# Supplementary material for: β-sheet Topology Prediction with High Precision and Recall for β and Mixed α/β Proteins
Source: PubMed Central journal article supplement (PMC3302896; doi:10.1371/journal.pone.0032461), 2012-03-09

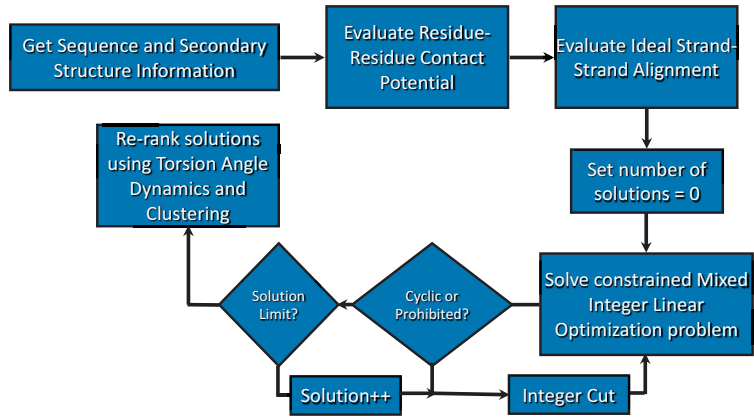

Supplement: pone.0032461.s001.pdf [file pone.0032461.s001.pdf]
