# Supplementary material for: β-sheet Topology Prediction with High Precision and Recall for β and Mixed α/β Proteins
Source: PubMed Central journal article supplement (PMC3302896; doi:10.1371/journal.pone.0032461), 2012-03-09
Supplement: pone.0032461.s003.pdf [file pone.0032461.s003.pdf]

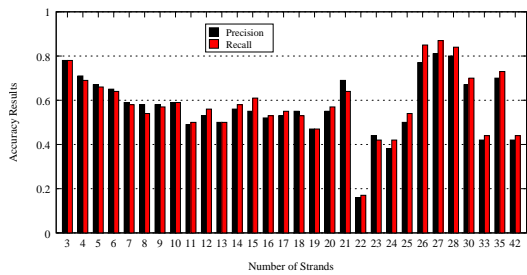

(a) Top 1 Solution

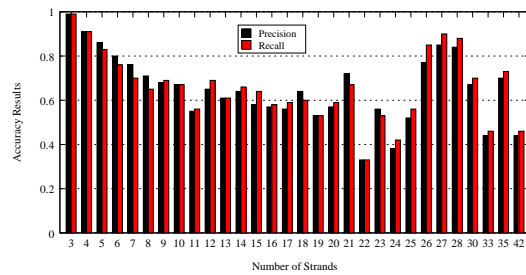

(b) Top 5 Solutions

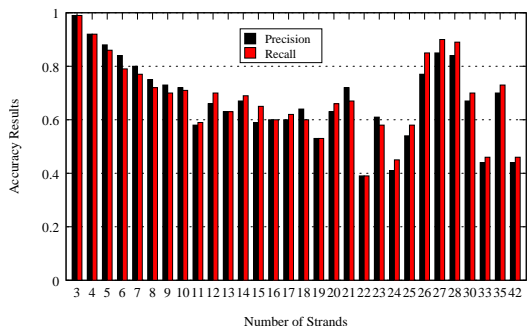

(c) Top 10 solutions

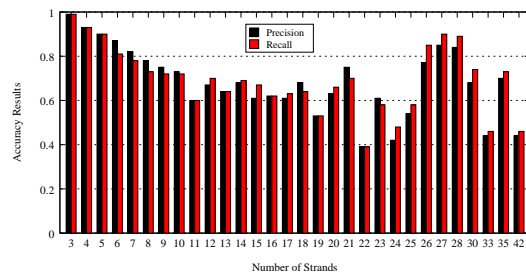

(d) Top 15 solutions

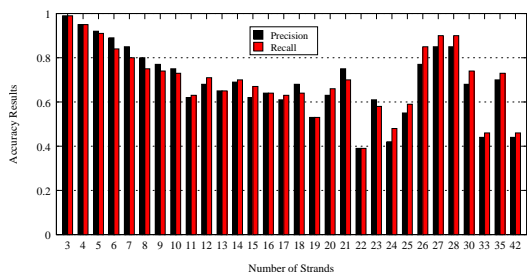

(e) Top 20 solutions

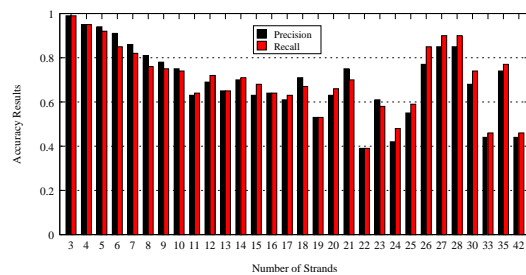

(f) Top 25 solutions
