# Supplementary material for: β-sheet Topology Prediction with High Precision and Recall for β and Mixed α/β Proteins
Source: PubMed Central journal article supplement (PMC3302896; doi:10.1371/journal.pone.0032461), 2012-03-09
Supplement: pone.0032461.s005.pdf [file pone.0032461.s005.pdf]

| Strands | Number of Motifs | Strands | Number of Motifs        |
|---------|------------------|---------|-------------------------|
| 2       | 2                | 3       | 12                      |
| 4       | 96               | 5       | 960                     |
| 6       | 11520            | 7       | 161280                  |
| 8       | 2580480          | 9       | 46448640                |
| 10      | 928972800        | 11      | $2.0437 \times 10^{10}$ |
