# Supplementary material for: β-sheet Topology Prediction with High Precision and Recall for β and Mixed α/β Proteins
Source: PubMed Central journal article supplement (PMC3302896; doi:10.1371/journal.pone.0032461), 2012-03-09
Supplement: pone.0032461.s006.pdf [file pone.0032461.s006.pdf]

| Protein | Strands | Top Solution |        |     | Top 5 solutions |        |     |
|---------|---------|--------------|--------|-----|-----------------|--------|-----|
|         |         | Precision    | Recall | MCC | Precision       | Recall | MCC |
| 3gcc    | 3       | 1.0          | 1.0    | 1.0 | 1.0             | 1.0    | 1.0 |
| 3ctr    | 3       | 1.0          | 1.0    | 1.0 | 1.0             | 1.0    | 1.0 |
| 3cjs    | 3       | 1.0          | 1.0    | 1.0 | 1.0             | 1.0    | 1.0 |
| 3cjs    | 3       | 1.0          | 1.0    | 1.0 | 1.0             | 1.0    | 1.0 |
| 2yx5    | 3       | 1.0          | 1.0    | 1.0 | 1.0             | 1.0    | 1.0 |
| 2yvr    | 3       | 1.0          | 1.0    | 1.0 | 1.0             | 1.0    | 1.0 |
| 2vb1    | 3       | 1.0          | 1.0    | 1.0 | 1.0             | 1.0    | 1.0 |
| 2ra4    | 3       | 1.0          | 1.0    | 1.0 | 1.0             | 1.0    | 1.0 |
| 2pxg    | 3       | 1.0          | 1.0    | 1.0 | 1.0             | 1.0    | 1.0 |
| 2p09    | 3       | 1.0          | 1.0    | 1.0 | 1.0             | 1.0    | 1.0 |
| 2ovg    | 3       | 1.0          | 1.0    | 1.0 | 1.0             | 1.0    | 1.0 |
| 2ooy    | 3       | 1.0          | 1.0    | 1.0 | 1.0             | 1.0    | 1.0 |
| 2odk    | 3       | 1.0          | 1.0    | 1.0 | 1.0             | 1.0    | 1.0 |
| 2ob9    | 3       | 1.0          | 1.0    | 1.0 | 1.0             | 1.0    | 1.0 |
| 2ns0    | 3       | 1.0          | 1.0    | 1.0 | 1.0             | 1.0    | 1.0 |
| 2k7i    | 3       | 1.0          | 1.0    | 1.0 | 1.0             | 1.0    | 1.0 |
| 2k4x    | 3       | 1.0          | 1.0    | 1.0 | 1.0             | 1.0    | 1.0 |
| 2k3i    | 3       | 1.0          | 1.0    | 1.0 | 1.0             | 1.0    | 1.0 |
| 2jrb    | 3       | 1.0          | 1.0    | 1.0 | 1.0             | 1.0    | 1.0 |
| 2jra    | 3       | 1.0          | 1.0    | 1.0 | 1.0             | 1.0    | 1.0 |
| 2jmp    | 3       | 1.0          | 1.0    | 1.0 | 1.0             | 1.0    | 1.0 |
| 2j7z    | 3       | 1.0          | 1.0    | 1.0 | 1.0             | 1.0    | 1.0 |
| 2iwl    | 3       | 1.0          | 1.0    | 1.0 | 1.0             | 1.0    | 1.0 |
| 2ho2    | 3       | 1.0          | 1.0    | 1.0 | 1.0             | 1.0    | 1.0 |

|      |   |     |     |     |     |     |     |
|------|---|-----|-----|-----|-----|-----|-----|
| 2hjj | 3 | 1.0 | 1.0 | 1.0 | 1.0 | 1.0 | 1.0 |
| 2hdl | 3 | 1.0 | 1.0 | 1.0 | 1.0 | 1.0 | 1.0 |
| 2hc5 | 3 | 1.0 | 1.0 | 1.0 | 1.0 | 1.0 | 1.0 |
| 2jtb | 3 | 1.0 | 1.0 | 1.0 | 1.0 | 1.0 | 1.0 |
| 2jyv | 3 | 1.0 | 1.0 | 1.0 | 1.0 | 1.0 | 1.0 |
| 2fv4 | 3 | 1.0 | 1.0 | 1.0 | 1.0 | 1.0 | 1.0 |
| 2fmr | 3 | 1.0 | 1.0 | 1.0 | 1.0 | 1.0 | 1.0 |
| 2fgg | 3 | 1.0 | 1.0 | 1.0 | 1.0 | 1.0 | 1.0 |
| 2f91 | 3 | 1.0 | 1.0 | 1.0 | 1.0 | 1.0 | 1.0 |
| 2el8 | 3 | 1.0 | 1.0 | 1.0 | 1.0 | 1.0 | 1.0 |
| 2e5r | 3 | 1.0 | 1.0 | 1.0 | 1.0 | 1.0 | 1.0 |
| 2dy8 | 3 | 1.0 | 1.0 | 1.0 | 1.0 | 1.0 | 1.0 |
| 2dsx | 3 | 1.0 | 1.0 | 1.0 | 1.0 | 1.0 | 1.0 |
| 2db2 | 3 | 1.0 | 1.0 | 1.0 | 1.0 | 1.0 | 1.0 |
| 2csk | 3 | 1.0 | 1.0 | 1.0 | 1.0 | 1.0 | 1.0 |
| 2cs7 | 3 | 1.0 | 1.0 | 1.0 | 1.0 | 1.0 | 1.0 |
| 2cou | 3 | 1.0 | 1.0 | 1.0 | 1.0 | 1.0 | 1.0 |
| 2cc6 | 3 | 1.0 | 1.0 | 1.0 | 1.0 | 1.0 | 1.0 |
| 2bh1 | 3 | 1.0 | 1.0 | 1.0 | 1.0 | 1.0 | 1.0 |
| 2b7t | 3 | 1.0 | 1.0 | 1.0 | 1.0 | 1.0 | 1.0 |
| 2ayj | 3 | 1.0 | 1.0 | 1.0 | 1.0 | 1.0 | 1.0 |
| 2aj6 | 3 | 1.0 | 1.0 | 1.0 | 1.0 | 1.0 | 1.0 |
| 1zzk | 3 | 1.0 | 1.0 | 1.0 | 1.0 | 1.0 | 1.0 |
| 1zmq | 3 | 1.0 | 1.0 | 1.0 | 1.0 | 1.0 | 1.0 |
| 1zmm | 3 | 1.0 | 1.0 | 1.0 | 1.0 | 1.0 | 1.0 |
| 1yyv | 3 | 1.0 | 1.0 | 1.0 | 1.0 | 1.0 | 1.0 |

|      |   |     |     |     |     |     |     |
|------|---|-----|-----|-----|-----|-----|-----|
| 1ywl | 3 | 1.0 | 1.0 | 1.0 | 1.0 | 1.0 | 1.0 |
| lytf | 3 | 1.0 | 1.0 | 1.0 | 1.0 | 1.0 | 1.0 |
| ly0n | 3 | 1.0 | 1.0 | 1.0 | 1.0 | 1.0 | 1.0 |
| lxs3 | 3 | 1.0 | 1.0 | 1.0 | 1.0 | 1.0 | 1.0 |
| lxjs | 3 | 1.0 | 1.0 | 1.0 | 1.0 | 1.0 | 1.0 |
| lxdx | 3 | 1.0 | 1.0 | 1.0 | 1.0 | 1.0 | 1.0 |
| lx4m | 3 | 1.0 | 1.0 | 1.0 | 1.0 | 1.0 | 1.0 |
| lx49 | 3 | 1.0 | 1.0 | 1.0 | 1.0 | 1.0 | 1.0 |
| lx48 | 3 | 1.0 | 1.0 | 1.0 | 1.0 | 1.0 | 1.0 |
| lwmv | 3 | 1.0 | 1.0 | 1.0 | 1.0 | 1.0 | 1.0 |
| lwlo | 3 | 1.0 | 1.0 | 1.0 | 1.0 | 1.0 | 1.0 |
| lwjw | 3 | 1.0 | 1.0 | 1.0 | 1.0 | 1.0 | 1.0 |
| lwhq | 3 | 1.0 | 1.0 | 1.0 | 1.0 | 1.0 | 1.0 |
| lvqo | 3 | 1.0 | 1.0 | 1.0 | 1.0 | 1.0 | 1.0 |
| luvg | 3 | 1.0 | 1.0 | 1.0 | 1.0 | 1.0 | 1.0 |
| lul4 | 3 | 1.0 | 1.0 | 1.0 | 1.0 | 1.0 | 1.0 |
| luhm | 3 | 1.0 | 1.0 | 1.0 | 1.0 | 1.0 | 1.0 |
| lub1 | 3 | 1.0 | 1.0 | 1.0 | 1.0 | 1.0 | 1.0 |
| lth5 | 3 | 1.0 | 1.0 | 1.0 | 1.0 | 1.0 | 1.0 |
| lt92 | 3 | 1.0 | 1.0 | 1.0 | 1.0 | 1.0 | 1.0 |
| lt4n | 3 | 1.0 | 1.0 | 1.0 | 1.0 | 1.0 | 1.0 |
| lsrq | 3 | 1.0 | 1.0 | 1.0 | 1.0 | 1.0 | 1.0 |
| lrod | 3 | 1.0 | 1.0 | 1.0 | 1.0 | 1.0 | 1.0 |
| lri9 | 3 | 1.0 | 1.0 | 1.0 | 1.0 | 1.0 | 1.0 |
| lr0r | 3 | 1.0 | 1.0 | 1.0 | 1.0 | 1.0 | 1.0 |
| lqkl | 3 | 1.0 | 1.0 | 1.0 | 1.0 | 1.0 | 1.0 |

|      |   |     |     |     |     |     |     |
|------|---|-----|-----|-----|-----|-----|-----|
| 1pug | 3 | 1.0 | 1.0 | 1.0 | 1.0 | 1.0 | 1.0 |
| 1ptq | 3 | 1.0 | 1.0 | 1.0 | 1.0 | 1.0 | 1.0 |
| 1pij | 3 | 1.0 | 1.0 | 1.0 | 1.0 | 1.0 | 1.0 |
| lovy | 3 | 1.0 | 1.0 | 1.0 | 1.0 | 1.0 | 1.0 |
| 1nh2 | 3 | 1.0 | 1.0 | 1.0 | 1.0 | 1.0 | 1.0 |
| 1ncs | 3 | 1.0 | 1.0 | 1.0 | 1.0 | 1.0 | 1.0 |
| 1mkn | 3 | 1.0 | 1.0 | 1.0 | 1.0 | 1.0 | 1.0 |
| 1ln0 | 3 | 1.0 | 1.0 | 1.0 | 1.0 | 1.0 | 1.0 |
| 1kjk | 3 | 1.0 | 1.0 | 1.0 | 1.0 | 1.0 | 1.0 |
| 1kbe | 3 | 1.0 | 1.0 | 1.0 | 1.0 | 1.0 | 1.0 |
| 1jkz | 3 | 1.0 | 1.0 | 1.0 | 1.0 | 1.0 | 1.0 |
| 1j27 | 3 | 1.0 | 1.0 | 1.0 | 1.0 | 1.0 | 1.0 |
| 1hy9 | 3 | 1.0 | 1.0 | 1.0 | 1.0 | 1.0 | 1.0 |
| 1gyx | 3 | 1.0 | 1.0 | 1.0 | 1.0 | 1.0 | 1.0 |
| 1g6z | 3 | 1.0 | 1.0 | 1.0 | 1.0 | 1.0 | 1.0 |
| 1g2r | 3 | 1.0 | 1.0 | 1.0 | 1.0 | 1.0 | 1.0 |
| 1glz | 3 | 1.0 | 1.0 | 1.0 | 1.0 | 1.0 | 1.0 |
| 1dtj | 3 | 1.0 | 1.0 | 1.0 | 1.0 | 1.0 | 1.0 |
| 1dp7 | 3 | 1.0 | 1.0 | 1.0 | 1.0 | 1.0 | 1.0 |
| 1dfn | 3 | 1.0 | 1.0 | 1.0 | 1.0 | 1.0 | 1.0 |
| 1dfe | 3 | 1.0 | 1.0 | 1.0 | 1.0 | 1.0 | 1.0 |
| 1co4 | 3 | 1.0 | 1.0 | 1.0 | 1.0 | 1.0 | 1.0 |
| 1c6w | 3 | 1.0 | 1.0 | 1.0 | 1.0 | 1.0 | 1.0 |
| 1bb8 | 3 | 1.0 | 1.0 | 1.0 | 1.0 | 1.0 | 1.0 |
| 1apf | 3 | 1.0 | 1.0 | 1.0 | 1.0 | 1.0 | 1.0 |
| 1ab7 | 3 | 1.0 | 1.0 | 1.0 | 1.0 | 1.0 | 1.0 |

|      |   |     |     |      |     |     |     |
|------|---|-----|-----|------|-----|-----|-----|
| 4sgb | 3 | 0.5 | 0.5 | -0.5 | 1.0 | 1.0 | 1.0 |
| 2p09 | 3 | 1.0 | 1.0 | 1.0  | 1.0 | 1.0 | 1.0 |
| 3egr | 3 | 0.5 | 0.5 | -0.5 | 1.0 | 1.0 | 1.0 |
| 3dpl | 3 | 0.5 | 0.5 | -0.5 | 1.0 | 1.0 | 1.0 |
| 3dom | 3 | 0.5 | 0.5 | -0.5 | 1.0 | 1.0 | 1.0 |
| 3dgp | 3 | 0.5 | 0.5 | -0.5 | 1.0 | 1.0 | 1.0 |
| 3ddt | 3 | 0.5 | 0.5 | -0.5 | 1.0 | 1.0 | 1.0 |
| 3bsu | 3 | 0.5 | 0.5 | 0    | 1.0 | 1.0 | 1.0 |
| 2vqc | 3 | 0.5 | 0.5 | -0.5 | 1.0 | 1.0 | 1.0 |
| 2v1n | 3 | 0.5 | 0.5 | -0.5 | 1.0 | 1.0 | 1.0 |
| 2qvo | 3 | 0.5 | 0.5 | -0.5 | 1.0 | 1.0 | 1.0 |
| 2pst | 3 | 0.5 | 0.5 | 0    | 1.0 | 1.0 | 1.0 |
| 2ppi | 3 | 0.5 | 0.5 | -0.5 | 1.0 | 1.0 | 1.0 |
| 2od5 | 3 | 0.5 | 0.5 | -0.5 | 1.0 | 1.0 | 1.0 |
| 2k2d | 3 | 0.5 | 0.5 | -0.5 | 1.0 | 1.0 | 1.0 |
| 2jtv | 3 | 0.5 | 0.5 | -0.5 | 1.0 | 1.0 | 1.0 |
| 2jt1 | 3 | 0.5 | 0.5 | -0.5 | 1.0 | 1.0 | 1.0 |
| 2jp6 | 3 | 0.5 | 0.5 | -0.5 | 1.0 | 1.0 | 1.0 |
| 2jnj | 3 | 0.5 | 0.5 | -0.5 | 1.0 | 1.0 | 1.0 |
| 2ikd | 3 | 0.5 | 0.5 | 0    | 1.0 | 1.0 | 1.0 |
| 2hvf | 3 | 0.5 | 0.5 | -0.5 | 1.0 | 1.0 | 1.0 |
| 2hh3 | 3 | 0.5 | 0.5 | 0    | 1.0 | 1.0 | 1.0 |
| 2hdp | 3 | 0.5 | 0.5 | -0.5 | 1.0 | 1.0 | 1.0 |
| 2guk | 3 | 0.5 | 0.5 | -0.5 | 1.0 | 1.0 | 1.0 |
| 2fqh | 3 | 0.5 | 0.5 | 0    | 1.0 | 1.0 | 1.0 |
| 2fma | 3 | 0.5 | 0.5 | -0.5 | 1.0 | 1.0 | 1.0 |

|      |   |     |     |      |     |     |     |
|------|---|-----|-----|------|-----|-----|-----|
| 2dy7 | 3 | 0.5 | 0.5 | 0    | 1.0 | 1.0 | 1.0 |
| 2dk5 | 3 | 0.5 | 0.5 | -0.5 | 1.0 | 1.0 | 1.0 |
| 2did | 3 | 0.5 | 0.5 | 0    | 1.0 | 1.0 | 1.0 |
| 2d8v | 3 | 0.5 | 0.5 | -0.5 | 1.0 | 1.0 | 1.0 |
| 2d7h | 3 | 0.5 | 0.5 | -0.5 | 1.0 | 1.0 | 1.0 |
| 2d28 | 3 | 0.5 | 0.5 | 0    | 1.0 | 1.0 | 1.0 |
| 2cpm | 3 | 0.5 | 0.5 | -0.5 | 1.0 | 1.0 | 1.0 |
| 2cka | 3 | 0.5 | 0.5 | 0    | 1.0 | 1.0 | 1.0 |
| 2bay | 3 | 0.5 | 0.5 | -0.5 | 1.0 | 1.0 | 1.0 |
| 1yd6 | 3 | 0.5 | 0.5 | -0.5 | 1.0 | 1.0 | 1.0 |
| 1xmk | 3 | 0.5 | 0.5 | -0.5 | 1.0 | 1.0 | 1.0 |
| 1xma | 3 | 0.5 | 0.5 | -0.5 | 1.0 | 1.0 | 1.0 |
| 1xhj | 3 | 0.5 | 0.5 | 0    | 1.0 | 1.0 | 1.0 |
| 1x5v | 3 | 0.5 | 0.5 | -0.5 | 1.0 | 1.0 | 1.0 |
| 1wi9 | 3 | 0.5 | 0.5 | -0.5 | 1.0 | 1.0 | 1.0 |
| 1wgm | 3 | 0.5 | 0.5 | -0.5 | 1.0 | 1.0 | 1.0 |
| 1wf9 | 3 | 0.5 | 0.5 | 0    | 1.0 | 1.0 | 1.0 |
| 1w6v | 3 | 0.5 | 0.5 | -0.5 | 1.0 | 1.0 | 1.0 |
| 1w1w | 3 | 0.5 | 0.5 | -0.5 | 1.0 | 1.0 | 1.0 |
| 1vnb | 3 | 0.5 | 0.5 | -0.5 | 1.0 | 1.0 | 1.0 |
| 1vbw | 3 | 0.5 | 0.5 | 0    | 1.0 | 1.0 | 1.0 |
| 1ufm | 3 | 0.5 | 0.5 | -0.5 | 1.0 | 1.0 | 1.0 |
| 1tv0 | 3 | 0.5 | 0.5 | -0.5 | 1.0 | 1.0 | 1.0 |
| 1tsk | 3 | 0.5 | 0.5 | -0.5 | 1.0 | 1.0 | 1.0 |
| 1ti5 | 3 | 0.5 | 0.5 | -0.5 | 1.0 | 1.0 | 1.0 |
| 1t2t | 3 | 0.5 | 0.5 | -0.5 | 1.0 | 1.0 | 1.0 |

|      |   |     |     |      |     |     |     |
|------|---|-----|-----|------|-----|-----|-----|
| 1t1h | 3 | 0.5 | 0.5 | -0.5 | 1.0 | 1.0 | 1.0 |
| 1smb | 3 | 0.5 | 0.5 | -0.5 | 1.0 | 1.0 | 1.0 |
| 1sis | 3 | 0.5 | 0.5 | -0.5 | 1.0 | 1.0 | 1.0 |
| 1sen | 3 | 0.5 | 0.5 | -0.5 | 1.0 | 1.0 | 1.0 |
| 1sb6 | 3 | 0.5 | 0.5 | -0.5 | 1.0 | 1.0 | 1.0 |
| 1r29 | 3 | 0.5 | 0.5 | -0.5 | 1.0 | 1.0 | 1.0 |
| 1pba | 3 | 0.5 | 0.5 | -0.5 | 1.0 | 1.0 | 1.0 |
| 1pav | 3 | 0.5 | 0.5 | -0.5 | 1.0 | 1.0 | 1.0 |
| 1p9g | 3 | 0.5 | 0.5 | -0.5 | 1.0 | 1.0 | 1.0 |
| 1p8b | 3 | 0.5 | 0.5 | -0.5 | 1.0 | 1.0 | 1.0 |
| 1p0a | 3 | 0.5 | 0.5 | -0.5 | 1.0 | 1.0 | 1.0 |
| 1ocy | 3 | 0.5 | 0.5 | -0.5 | 1.0 | 1.0 | 1.0 |
| 1ny8 | 3 | 0.5 | 0.5 | 0    | 1.0 | 1.0 | 1.0 |
| 1n4n | 3 | 0.5 | 0.5 | -0.5 | 1.0 | 1.0 | 1.0 |
| 1msz | 3 | 0.5 | 0.5 | -0.5 | 1.0 | 1.0 | 1.0 |
| 1lr0 | 3 | 0.5 | 0.5 | -0.5 | 1.0 | 1.0 | 1.0 |
| 1kvd | 3 | 0.5 | 0.5 | -0.5 | 1.0 | 1.0 | 1.0 |
| 1kqh | 3 | 0.5 | 0.5 | -0.5 | 1.0 | 1.0 | 1.0 |
| 1kj5 | 3 | 0.5 | 0.5 | -0.5 | 1.0 | 1.0 | 1.0 |
| 1jxs | 3 | 0.5 | 0.5 | -0.5 | 1.0 | 1.0 | 1.0 |
| 1jid | 3 | 0.5 | 0.5 | -0.5 | 1.0 | 1.0 | 1.0 |
| 1j75 | 3 | 0.5 | 0.5 | -0.5 | 1.0 | 1.0 | 1.0 |
| 1ix9 | 3 | 0.5 | 0.5 | -0.5 | 1.0 | 1.0 | 1.0 |
| 1iw4 | 3 | 0.5 | 0.5 | -0.5 | 1.0 | 1.0 | 1.0 |
| 1iuy | 3 | 0.5 | 0.5 | -0.5 | 1.0 | 1.0 | 1.0 |
| 1iua | 3 | 0.5 | 0.5 | -0.5 | 1.0 | 1.0 | 1.0 |

|      |   |     |     |      |     |      |      |
|------|---|-----|-----|------|-----|------|------|
| 1hx7 | 3 | 0.5 | 0.5 | -0.5 | 1.0 | 1.0  | 1.0  |
| 1g25 | 3 | 0.5 | 0.5 | 0    | 1.0 | 1.0  | 1.0  |
| 1ews | 3 | 0.5 | 0.5 | -0.5 | 1.0 | 1.0  | 1.0  |
| 1eod | 3 | 0.5 | 0.5 | -0.5 | 1.0 | 1.0  | 1.0  |
| 1dkc | 3 | 0.5 | 0.5 | -0.5 | 1.0 | 1.0  | 1.0  |
| 1cf7 | 3 | 0.5 | 0.5 | -0.5 | 1.0 | 1.0  | 1.0  |
| 1brz | 3 | 0.5 | 0.5 | -0.5 | 1.0 | 1.0  | 1.0  |
| 1boe | 3 | 0.5 | 0.5 | -0.5 | 1.0 | 1.0  | 1.0  |
| 3grx | 4 | 1.0 | 1.0 | 1.0  | 1.0 | 1.0  | 1.0  |
| 3ci0 | 4 | 1.0 | 1.0 | 1.0  | 1.0 | 1.0  | 1.0  |
| 3ca7 | 4 | 1.0 | 1.0 | 1.0  | 1.0 | 1.0  | 1.0  |
| 3c9b | 4 | 1.0 | 1.0 | 1.0  | 1.0 | 1.0  | 1.0  |
| 3b47 | 4 | 1.0 | 1.0 | 1.0  | 1.0 | 1.0  | 1.0  |
| 2z6o | 4 | 1.0 | 1.0 | 1.0  | 1.0 | 1.0  | 1.0  |
| 2yxy | 4 | 1.0 | 1.0 | 1.0  | 1.0 | 1.0  | 1.0  |
| 2ywq | 4 | 1.0 | 1.0 | 1.0  | 1.0 | 0.67 | 0.71 |
| 2s0y | 4 | 1.0 | 1.0 | 1.0  | 1.0 | 1.0  | 1.0  |
| 2s04 | 4 | 1.0 | 1.0 | 1.0  | 1.0 | 1.0  | 1.0  |
| 2qsk | 4 | 1.0 | 1.0 | 1.0  | 1.0 | 1.0  | 1.0  |
| 2qkh | 4 | 1.0 | 1.0 | 1.0  | 1.0 | 1.0  | 1.0  |
| 2k5c | 4 | 1.0 | 1.0 | 1.0  | 1.0 | 1.0  | 1.0  |
| 2k2w | 4 | 1.0 | 1.0 | 1.0  | 1.0 | 1.0  | 1.0  |
| 2k1h | 4 | 1.0 | 1.0 | 1.0  | 1.0 | 1.0  | 1.0  |
| 2jv8 | 4 | 1.0 | 1.0 | 1.0  | 1.0 | 1.0  | 1.0  |
| 2jrj | 4 | 1.0 | 1.0 | 1.0  | 1.0 | 1.0  | 1.0  |
| 2jor | 4 | 1.0 | 1.0 | 1.0  | 1.0 | 1.0  | 1.0  |



|      |   |     |     |     |     |     |     |
|------|---|-----|-----|-----|-----|-----|-----|
| 2jod | 4 | 1.0 | 1.0 | 1.0 | 1.0 | 1.0 | 1.0 |
| 2j3r | 4 | 1.0 | 1.0 | 1.0 | 1.0 | 1.0 | 1.0 |
| 2j03 | 4 | 1.0 | 1.0 | 1.0 | 1.0 | 1.0 | 1.0 |
| 2iy2 | 4 | 1.0 | 1.0 | 1.0 | 1.0 | 1.0 | 1.0 |
| 2hx2 | 4 | 1.0 | 1.0 | 1.0 | 1.0 | 1.0 | 1.0 |
| 2hgc | 4 | 1.0 | 1.0 | 1.0 | 1.0 | 1.0 | 1.0 |
| 2hbp | 4 | 1.0 | 1.0 | 1.0 | 1.0 | 1.0 | 1.0 |
| 2ftx | 4 | 1.0 | 1.0 | 1.0 | 1.0 | 1.0 | 1.0 |
| 2fm7 | 4 | 1.0 | 1.0 | 1.0 | 1.0 | 1.0 | 1.0 |
| 2ffg | 4 | 1.0 | 1.0 | 1.0 | 1.0 | 1.0 | 1.0 |
| 2fdn | 4 | 1.0 | 1.0 | 1.0 | 1.0 | 1.0 | 1.0 |
| 2f4w | 4 | 1.0 | 1.0 | 1.0 | 1.0 | 1.0 | 1.0 |
| 2ex5 | 4 | 1.0 | 1.0 | 1.0 | 1.0 | 1.0 | 1.0 |
| 2eky | 4 | 1.0 | 1.0 | 1.0 | 1.0 | 1.0 | 1.0 |
| 2dko | 4 | 1.0 | 1.0 | 1.0 | 1.0 | 1.0 | 1.0 |
| 2dko | 4 | 1.0 | 1.0 | 1.0 | 1.0 | 1.0 | 1.0 |
| 2d5r | 4 | 1.0 | 1.0 | 1.0 | 1.0 | 1.0 | 1.0 |
| 2cw1 | 4 | 1.0 | 1.0 | 1.0 | 1.0 | 1.0 | 1.0 |
| 2ct7 | 4 | 1.0 | 1.0 | 1.0 | 1.0 | 1.0 | 1.0 |
| 2cjs | 4 | 1.0 | 1.0 | 1.0 | 1.0 | 1.0 | 1.0 |
| 2bx9 | 4 | 1.0 | 1.0 | 1.0 | 1.0 | 1.0 | 1.0 |
| 2bhm | 4 | 1.0 | 1.0 | 1.0 | 1.0 | 1.0 | 1.0 |
| 2ask | 4 | 1.0 | 1.0 | 1.0 | 1.0 | 1.0 | 1.0 |
| 1zk6 | 4 | 1.0 | 1.0 | 1.0 | 1.0 | 1.0 | 1.0 |
| 1zgu | 4 | 1.0 | 1.0 | 1.0 | 1.0 | 1.0 | 1.0 |
| 1z9w | 4 | 1.0 | 1.0 | 1.0 | 1.0 | 1.0 | 1.0 |

|      |   |     |      |      |     |     |     |
|------|---|-----|------|------|-----|-----|-----|
| 1z8m | 4 | 1.0 | 1.0  | 1.0  | 1.0 | 1.0 | 1.0 |
| 1z2u | 4 | 1.0 | 1.0  | 1.0  | 1.0 | 1.0 | 1.0 |
| 1xpv | 4 | 1.0 | 0.67 | 0.71 | 1.0 | 1.0 | 1.0 |
| 1xee | 4 | 1.0 | 1.0  | 1.0  | 1.0 | 1.0 | 1.0 |
| 1x6e | 4 | 1.0 | 1.0  | 1.0  | 1.0 | 1.0 | 1.0 |
| 1x4s | 4 | 1.0 | 1.0  | 1.0  | 1.0 | 1.0 | 1.0 |
| 1x4l | 4 | 1.0 | 1.0  | 1.0  | 1.0 | 1.0 | 1.0 |
| 1wpu | 4 | 1.0 | 1.0  | 1.0  | 1.0 | 1.0 | 1.0 |
| 1wh2 | 4 | 1.0 | 1.0  | 1.0  | 1.0 | 1.0 | 1.0 |
| 1vfy | 4 | 1.0 | 1.0  | 1.0  | 1.0 | 1.0 | 1.0 |
| 1vaz | 4 | 1.0 | 1.0  | 1.0  | 1.0 | 1.0 | 1.0 |
| 1v5i | 4 | 1.0 | 1.0  | 1.0  | 1.0 | 1.0 | 1.0 |
| 1v14 | 4 | 1.0 | 1.0  | 1.0  | 1.0 | 1.0 | 1.0 |
| 1usm | 4 | 1.0 | 1.0  | 1.0  | 1.0 | 1.0 | 1.0 |
| 1twc | 4 | 1.0 | 1.0  | 1.0  | 1.0 | 1.0 | 1.0 |
| 1tfi | 4 | 1.0 | 1.0  | 1.0  | 1.0 | 1.0 | 1.0 |
| 1t9i | 4 | 1.0 | 1.0  | 1.0  | 1.0 | 1.0 | 1.0 |
| 1t6r | 4 | 1.0 | 1.0  | 1.0  | 1.0 | 1.0 | 1.0 |
| 1sro | 4 | 1.0 | 1.0  | 1.0  | 1.0 | 1.0 | 1.0 |
| 1shi | 4 | 1.0 | 1.0  | 1.0  | 1.0 | 1.0 | 1.0 |
| 1s0y | 4 | 1.0 | 1.0  | 1.0  | 1.0 | 1.0 | 1.0 |
| 1s04 | 4 | 1.0 | 1.0  | 1.0  | 1.0 | 1.0 | 1.0 |
| 1pyo | 4 | 1.0 | 1.0  | 1.0  | 1.0 | 1.0 | 1.0 |
| 1pcf | 4 | 1.0 | 1.0  | 1.0  | 1.0 | 1.0 | 1.0 |
| 1lmm | 4 | 1.0 | 1.0  | 1.0  | 1.0 | 1.0 | 1.0 |
| 1lkk | 4 | 1.0 | 1.0  | 1.0  | 1.0 | 1.0 | 1.0 |

|      |   |      |      |      |     |     |     |
|------|---|------|------|------|-----|-----|-----|
| 1kwi | 4 | 1.0  | 1.0  | 1.0  | 1.0 | 1.0 | 1.0 |
| 1kp6 | 4 | 1.0  | 1.0  | 1.0  | 1.0 | 1.0 | 1.0 |
| 1jrm | 4 | 1.0  | 1.0  | 1.0  | 1.0 | 1.0 | 1.0 |
| 1j2l | 4 | 1.0  | 1.0  | 1.0  | 1.0 | 1.0 | 1.0 |
| 1j27 | 4 | 1.0  | 1.0  | 1.0  | 1.0 | 1.0 | 1.0 |
| 1j0p | 4 | 1.0  | 1.0  | 1.0  | 1.0 | 1.0 | 1.0 |
| 1guo | 4 | 1.0  | 1.0  | 1.0  | 1.0 | 1.0 | 1.0 |
| 1g5v | 4 | 1.0  | 1.0  | 1.0  | 1.0 | 1.0 | 1.0 |
| 1fsh | 4 | 1.0  | 1.0  | 1.0  | 1.0 | 1.0 | 1.0 |
| 1fsb | 4 | 1.0  | 1.0  | 1.0  | 1.0 | 1.0 | 1.0 |
| 1faq | 4 | 1.0  | 1.0  | 1.0  | 1.0 | 1.0 | 1.0 |
| 1dec | 4 | 1.0  | 1.0  | 1.0  | 1.0 | 1.0 | 1.0 |
| 1bf9 | 4 | 1.0  | 1.0  | 1.0  | 1.0 | 1.0 | 1.0 |
| 1auu | 4 | 1.0  | 1.0  | 1.0  | 1.0 | 1.0 | 1.0 |
| 1x4l | 4 | 1.0  | 1.0  | 1.0  | 1.0 | 1.0 | 1.0 |
| 1apq | 4 | 1.0  | 1.0  | 1.0  | 1.0 | 1.0 | 1.0 |
| 3ci0 | 4 | 1.0  | 1.0  | 1.0  | 1.0 | 1.0 | 1.0 |
| 3grx | 4 | 1.0  | 1.0  | 1.0  | 1.0 | 1.0 | 1.0 |
| 1hx2 | 4 | 1.0  | 1.0  | 1.0  | 1.0 | 1.0 | 1.0 |
| 3dvv | 4 | 0.67 | 0.67 | 0.33 | 1.0 | 1.0 | 1.0 |
| 3dfe | 4 | 0.67 | 0.67 | 0.33 | 1.0 | 1.0 | 1.0 |
| 3df8 | 4 | 0.67 | 1.0  | 0.71 | 1.0 | 1.0 | 1.0 |
| 3ct6 | 4 | 0.67 | 0.67 | 0.33 | 1.0 | 1.0 | 1.0 |
| 3ccd | 4 | 0.67 | 0.67 | 0.33 | 1.0 | 1.0 | 1.0 |
| 3bv8 | 4 | 0.67 | 0.67 | 0.33 | 1.0 | 1.0 | 1.0 |
| 3b8o | 4 | 0.67 | 0.67 | 0.33 | 1.0 | 1.0 | 1.0 |

|      |   |      |      |      |      |      |      |
|------|---|------|------|------|------|------|------|
| 2yz0 | 4 | 0.67 | 0.67 | 0.42 | 1.0  | 1.0  | 1.0  |
| 2yre | 4 | 0.67 | 1.0  | 0.71 | 1.0  | 1.0  | 1.0  |
| 2vkc | 4 | 0.67 | 0.67 | 0.33 | 1.0  | 1.0  | 1.0  |
| 2vgh | 4 | 0.67 | 1.0  | 0.71 | 1.0  | 1.0  | 1.0  |
| 2va0 | 4 | 0.67 | 0.67 | 0.33 | 1.0  | 1.0  | 1.0  |
| 2v6v | 4 | 0.67 | 0.67 | 0.33 | 1.0  | 1.0  | 1.0  |
| 2rfk | 4 | 0.67 | 0.67 | 0.33 | 1.0  | 1.0  | 1.0  |
| 2qmt | 4 | 0.67 | 0.67 | 0.42 | 1.0  | 1.0  | 1.0  |
| 2qif | 4 | 0.67 | 0.67 | 0.33 | 1.0  | 1.0  | 1.0  |
| 2pv1 | 4 | 0.67 | 0.67 | 0.33 | 1.0  | 1.0  | 1.0  |
| 2pr3 | 4 | 0.67 | 1.0  | 0.71 | 1.0  | 1.0  | 1.0  |
| 2p6t | 4 | 0.67 | 0.67 | 0.33 | 1.0  | 1.0  | 1.0  |
| 2ov6 | 4 | 0.67 | 0.67 | 0.42 | 1.0  | 1.0  | 1.0  |
| 2osd | 4 | 0.67 | 0.67 | 0.33 | 1.0  | 1.0  | 1.0  |
| 2o1r | 4 | 0.67 | 0.67 | 0.33 | 1.0  | 1.0  | 1.0  |
| 2nuh | 4 | 0.67 | 0.67 | 0.33 | 0.67 | 0.67 | 0.33 |
| 2nto | 4 | 0.67 | 0.67 | 0.33 | 1.0  | 0.67 | 0.71 |
| 2jro | 4 | 0.67 | 0.67 | 0.42 | 1.0  | 1.0  | 1.0  |
| 2jq5 | 4 | 0.67 | 0.67 | 0.33 | 1.0  | 1.0  | 1.0  |
| 2iyb | 4 | 0.67 | 1.0  | 0.71 | 1.0  | 1.0  | 1.0  |
| 2ida | 4 | 0.67 | 0.67 | 0.42 | 1.0  | 1.0  | 1.0  |
| 2hx6 | 4 | 0.67 | 0.67 | 0.33 | 1.0  | 1.0  | 1.0  |
| 2ht9 | 4 | 0.67 | 0.67 | 0.33 | 1.0  | 1.0  | 1.0  |
| 2hj8 | 4 | 0.67 | 0.67 | 0.42 | 1.0  | 1.0  | 1.0  |
| 2hd0 | 4 | 0.67 | 0.67 | 0.33 | 0.67 | 0.67 | 0.33 |
| 2h0u | 4 | 0.67 | 0.67 | 0.42 | 1.0  | 1.0  | 1.0  |

|      |   |      |      |      |      |      |      |
|------|---|------|------|------|------|------|------|
| 2gi4 | 4 | 0.67 | 0.67 | 0.33 | 1.0  | 0.67 | 0.71 |
| 2g2q | 4 | 0.67 | 0.67 | 0.33 | 1.0  | 1.0  | 1.0  |
| 2fqm | 4 | 0.67 | 1.0  | 0.71 | 0.67 | 1.0  | 0.71 |
| 2fgx | 4 | 0.67 | 0.67 | 0.33 | 1.0  | 0.67 | 0.71 |
| 2fcw | 4 | 0.67 | 1.0  | 0.71 | 1.0  | 1.0  | 1.0  |
| 2ec4 | 4 | 0.67 | 0.67 | 0.33 | 1.0  | 0.67 | 0.71 |
| 2e0g | 4 | 0.67 | 0.67 | 0.33 | 0.67 | 0.67 | 0.33 |
| 2dmm | 4 | 0.67 | 0.67 | 0.42 | 0.67 | 0.67 | 0.33 |
| 2dao | 4 | 0.67 | 0.67 | 0.42 | 1.0  | 1.0  | 1.0  |
| 2d8m | 4 | 0.67 | 0.67 | 0.33 | 0.67 | 0.67 | 0.33 |
| 2cfx | 4 | 0.67 | 0.67 | 0.33 | 1.0  | 1.0  | 1.0  |
| 2bkn | 4 | 0.67 | 0.67 | 0.33 | 1.0  | 1.0  | 1.0  |
| 2b9k | 4 | 0.67 | 0.67 | 0.33 | 1.0  | 1.0  | 1.0  |
| 2b3w | 4 | 0.67 | 1.0  | 0.71 | 0.67 | 1.0  | 0.71 |
| 1z3e | 4 | 0.67 | 0.67 | 0.33 | 1.0  | 0.67 | 0.71 |
| 1xww | 4 | 0.67 | 0.67 | 0.33 | 1.0  | 0.67 | 0.71 |
| 1xpp | 4 | 0.67 | 0.67 | 0.33 | 1.0  | 0.67 | 0.71 |
| 1xi7 | 4 | 0.67 | 0.67 | 0.33 | 1.0  | 1.0  | 1.0  |
| 1xg8 | 4 | 0.67 | 0.67 | 0.33 | 1.0  | 0.67 | 0.71 |
| 1x9a | 4 | 0.67 | 0.67 | 0.42 | 0.67 | 0.67 | 0.33 |
| 1x8d | 4 | 0.67 | 0.67 | 0.33 | 1.0  | 1.0  | 1.0  |
| 1x7v | 4 | 0.67 | 0.67 | 0.33 | 1.0  | 0.67 | 0.71 |
| 1x60 | 4 | 0.67 | 0.67 | 0.33 | 1.0  | 1.0  | 1.0  |
| 1wxn | 4 | 0.67 | 0.67 | 0.33 | 1.0  | 1.0  | 1.0  |
| 1wwq | 4 | 0.67 | 0.67 | 0.33 | 1.0  | 1.0  | 1.0  |
| 1wpi | 4 | 0.67 | 0.67 | 0.33 | 1.0  | 0.67 | 0.71 |

|      |   |      |      |      |      |      |      |
|------|---|------|------|------|------|------|------|
| 1wju | 4 | 0.67 | 0.67 | 0.33 | 1.0  | 1.0  | 1.0  |
| 1wik | 4 | 0.67 | 0.67 | 0.33 | 1.0  | 0.67 | 0.71 |
| 1whx | 4 | 0.67 | 0.67 | 0.33 | 1.0  | 1.0  | 1.0  |
| 1v9x | 4 | 0.67 | 0.67 | 0.33 | 0.67 | 0.67 | 0.42 |
| 1uzx | 4 | 0.67 | 0.67 | 0.33 | 0.67 | 0.67 | 0.33 |
| 1unn | 4 | 0.67 | 0.67 | 0.33 | 1.0  | 0.67 | 0.71 |
| 1ul7 | 4 | 0.67 | 0.67 | 0.33 | 1.0  | 0.67 | 0.71 |
| 1u2f | 4 | 0.67 | 0.67 | 0.33 | 0.67 | 0.67 | 0.33 |
| 1txe | 4 | 0.67 | 0.67 | 0.33 | 1.0  | 1.0  | 1.0  |
| 1ti8 | 4 | 0.67 | 1.0  | 0.71 | 1.0  | 1.0  | 1.0  |
| 1te7 | 4 | 0.67 | 0.67 | 0.33 | 1.0  | 1.0  | 1.0  |
| 1t4z | 4 | 0.67 | 0.67 | 0.33 | 1.0  | 0.67 | 0.71 |
| 1t1v | 4 | 0.67 | 0.67 | 0.33 | 1.0  | 0.67 | 0.71 |
| 1t0h | 4 | 0.67 | 0.67 | 0.42 | 1.0  | 1.0  | 1.0  |
| 1sj1 | 4 | 0.67 | 1.0  | 0.71 | 0.67 | 1.0  | 0.71 |
| 1s3a | 4 | 0.67 | 0.67 | 0.42 | 0.67 | 0.67 | 0.33 |
| 1rw1 | 4 | 0.67 | 0.67 | 0.33 | 1.0  | 0.67 | 0.71 |
| 1rmd | 4 | 0.67 | 1.0  | 0.71 | 0.67 | 1.0  | 0.71 |
| 1rjj | 4 | 0.67 | 0.67 | 0.33 | 1.0  | 1.0  | 1.0  |
| 1r4w | 4 | 0.67 | 0.67 | 0.33 | 1.0  | 0.67 | 0.71 |
| 1qyn | 4 | 0.67 | 0.67 | 0.33 | 1.0  | 0.67 | 0.71 |
| 1qld | 4 | 0.67 | 1.0  | 0.71 | 1.0  | 1.0  | 1.0  |
| 1q5y | 4 | 0.67 | 0.67 | 0.33 | 1.0  | 0.67 | 0.71 |
| 1p9k | 4 | 0.67 | 0.67 | 0.42 | 0.67 | 0.67 | 0.42 |
| 1o2f | 4 | 0.67 | 0.67 | 0.33 | 1.0  | 1.0  | 1.0  |
| 1n88 | 4 | 0.67 | 0.67 | 0.42 | 1.0  | 1.0  | 1.0  |

|      |   |      |      |      |      |      |      |
|------|---|------|------|------|------|------|------|
| 1n32 | 4 | 0.67 | 1.0  | 0.71 | 0.67 | 1.0  | 0.71 |
| 1n32 | 4 | 0.67 | 1.0  | 0.71 | 0.67 | 1.0  | 0.71 |
| 1n32 | 4 | 0.67 | 1.0  | 0.71 | 0.67 | 1.0  | 0.71 |
| 1n32 | 4 | 0.67 | 1.0  | 0.71 | 0.67 | 1.0  | 0.71 |
| 1mvf | 4 | 0.67 | 1.0  | 0.71 | 0.67 | 1.0  | 0.71 |
| 1lxj | 4 | 0.67 | 0.67 | 0.33 | 1.0  | 1.0  | 1.0  |
| 1ka8 | 4 | 0.67 | 1.0  | 0.71 | 0.67 | 1.0  | 0.71 |
| 1k4u | 4 | 0.67 | 0.67 | 0.42 | 1.0  | 1.0  | 1.0  |
| 1jo0 | 4 | 0.67 | 0.67 | 0.33 | 1.0  | 1.0  | 1.0  |
| 1jf8 | 4 | 0.67 | 0.67 | 0.33 | 1.0  | 0.67 | 0.71 |
| 1j98 | 4 | 0.67 | 0.67 | 0.33 | 1.0  | 0.67 | 0.71 |
| lism | 4 | 0.67 | 0.67 | 0.42 | 0.67 | 0.67 | 0.33 |
| liqz | 4 | 0.67 | 1.0  | 0.71 | 0.67 | 1.0  | 0.71 |
| 1hz6 | 4 | 0.67 | 0.67 | 0.33 | 0.67 | 0.67 | 0.33 |
| 1h75 | 4 | 0.67 | 0.67 | 0.42 | 0.67 | 0.67 | 0.42 |
| 1gh9 | 4 | 0.67 | 0.67 | 0.33 | 1.0  | 1.0  | 1.0  |
| 1g7e | 4 | 0.67 | 0.67 | 0.33 | 0.67 | 0.67 | 0.42 |
| 1g47 | 4 | 0.67 | 1.0  | 0.71 | 1.0  | 1.0  | 1.0  |
| 1fxk | 4 | 0.67 | 1.0  | 0.71 | 0.67 | 1.0  | 0.71 |
| 1fo5 | 4 | 0.67 | 0.67 | 0.33 | 1.0  | 0.67 | 0.71 |
| 1emw | 4 | 0.67 | 0.67 | 0.33 | 1.0  | 1.0  | 1.0  |
| 1ed7 | 4 | 0.67 | 1.0  | 0.71 | 0.67 | 1.0  | 0.71 |
| 1eai | 4 | 0.67 | 1.0  | 0.71 | 0.67 | 1.0  | 0.71 |
| 1e8p | 4 | 0.67 | 0.67 | 0.33 | 1.0  | 1.0  | 1.0  |
| 1e44 | 4 | 0.67 | 0.67 | 0.33 | 1.0  | 1.0  | 1.0  |
| 1de1 | 4 | 0.67 | 0.67 | 0.33 | 1.0  | 0.67 | 0.71 |

|      |   |      |      |        |      |      |       |
|------|---|------|------|--------|------|------|-------|
| 1dcj | 4 | 0.67 | 0.67 | 0.33   | 0.67 | 0.67 | 0.42  |
| 1cxw | 4 | 0.67 | 1.0  | 0.71   | 1.0  | 1.0  | 1.0   |
| 1ccv | 4 | 0.67 | 1.0  | 0.71   | 1.0  | 1.0  | 1.0   |
| 1cc8 | 4 | 0.67 | 0.67 | 0.33   | 1.0  | 1.0  | 1.0   |
| 1bcr | 4 | 0.67 | 0.67 | 0.33   | 0.67 | 0.67 | 0.33  |
| 2ibl | 4 | 0.5  | 0.5  | 0.3    | 0.5  | 0.5  | 0.3   |
| 1cou | 4 | 0.5  | 0.5  | 0.3    | 1.0  | 1.0  | 1.0   |
| 3e8o | 4 | 0.33 | 0.33 | -0.33  | 1.0  | 1.0  | 1.0   |
| 3dex | 4 | 0.33 | 0.33 | -0.17  | 0.5  | 0.33 | 0.091 |
| 3d32 | 4 | 0.33 | 0.33 | -0.067 | 0.67 | 0.67 | 0.42  |
| 3bm7 | 4 | 0.33 | 0.33 | -0.33  | 1.0  | 1.0  | 1.0   |
| 2zbc | 4 | 0.33 | 0.33 | -0.33  | 1.0  | 1.0  | 1.0   |
| 2z30 | 4 | 0.33 | 0.33 | -0.33  | 1.0  | 1.0  | 1.0   |
| 2rgv | 4 | 0.33 | 0.5  | 0      | 0.5  | 0.5  | 0.3   |
| 2qt7 | 4 | 0.33 | 0.33 | -0.33  | 0.67 | 0.67 | 0.33  |
| 2qsw | 4 | 0.33 | 0.33 | -0.33  | 0.67 | 0.67 | 0.33  |
| 2obb | 4 | 0.33 | 0.33 | -0.33  | 0.67 | 0.67 | 0.42  |
| 2ibo | 4 | 0.33 | 0.33 | -0.33  | 0.67 | 0.67 | 0.33  |
| 2hyi | 4 | 0.33 | 0.33 | -0.33  | 0.67 | 0.67 | 0.33  |
| 2hfq | 4 | 0.33 | 0.33 | -0.33  | 0.67 | 0.67 | 0.33  |
| 2gle | 4 | 0.33 | 0.33 | -0.17  | 0.67 | 0.67 | 0.33  |
| 2g0j | 4 | 0.33 | 0.33 | -0.33  | 0.67 | 0.67 | 0.42  |
| 2g0c | 4 | 0.33 | 0.33 | -0.33  | 0.67 | 0.67 | 0.33  |
| 2f3j | 4 | 0.33 | 0.33 | -0.33  | 0.67 | 0.67 | 0.33  |
| 2eh1 | 4 | 0.33 | 0.33 | -0.33  | 0.67 | 0.67 | 0.33  |
| 2djk | 4 | 0.33 | 0.33 | -0.33  | 0.67 | 0.67 | 0.33  |



|      |   |      |      |        |      |      |       |
|------|---|------|------|--------|------|------|-------|
| 2cfa | 4 | 0.33 | 0.33 | -0.067 | 1.0  | 1.0  | 1.0   |
| 2caj | 4 | 0.33 | 0.33 | -0.33  | 0.67 | 0.67 | 0.33  |
| 2b0g | 4 | 0.33 | 0.33 | -0.33  | 0.67 | 0.67 | 0.33  |
| 2aze | 4 | 0.33 | 0.5  | 0      | 0.67 | 1.0  | 0.71  |
| 2aiz | 4 | 0.33 | 0.33 | -0.33  | 1.0  | 1.0  | 1.0   |
| 2a3j | 4 | 0.33 | 0.33 | -0.33  | 0.67 | 0.67 | 0.33  |
| 1yo3 | 4 | 0.33 | 0.33 | -0.33  | 0.67 | 0.67 | 0.42  |
| 1y9x | 4 | 0.33 | 0.33 | -0.33  | 0.67 | 0.67 | 0.33  |
| 1xbw | 4 | 0.33 | 0.33 | -0.33  | 0.67 | 0.67 | 0.33  |
| 1xax | 4 | 0.33 | 0.33 | -0.17  | 0.5  | 0.33 | 0.091 |
| 1x65 | 4 | 0.33 | 0.33 | -0.33  | 1.0  | 1.0  | 1.0   |
| 1x4f | 4 | 0.33 | 0.33 | -0.33  | 0.67 | 0.67 | 0.33  |
| 1x4e | 4 | 0.33 | 0.33 | -0.33  | 0.67 | 0.67 | 0.33  |
| 1wot | 4 | 0.33 | 0.33 | -0.17  | 1.0  | 0.67 | 0.71  |
| 1why | 4 | 0.33 | 0.33 | -0.33  | 0.67 | 0.67 | 0.33  |
| 1wg5 | 4 | 0.33 | 0.33 | -0.33  | 1.0  | 1.0  | 1.0   |
| 1wf6 | 4 | 0.33 | 0.33 | -0.067 | 0.33 | 0.33 | -0.33 |
| 1wex | 4 | 0.33 | 0.33 | -0.33  | 0.67 | 0.67 | 0.33  |
| 1vrv | 4 | 0.33 | 0.33 | -0.17  | 0.67 | 0.67 | 0.42  |
| 1vr4 | 4 | 0.33 | 0.33 | -0.33  | 0.67 | 0.67 | 0.33  |
| 1vqs | 4 | 0.33 | 0.33 | -0.33  | 1.0  | 1.0  | 1.0   |
| 1vmb | 4 | 0.33 | 0.33 | -0.33  | 0.67 | 0.67 | 0.33  |
| 1u3o | 4 | 0.33 | 0.5  | 0.091  | 0.5  | 0.5  | 0.3   |
| 1tz1 | 4 | 0.33 | 0.5  | 0      | 1.0  | 1.0  | 1.0   |
| lowx | 4 | 0.33 | 0.33 | -0.33  | 0.67 | 0.67 | 0.33  |
| lotg | 4 | 0.33 | 0.33 | -0.17  | 0.67 | 0.67 | 0.42  |

|      |   |      |      |        |      |      |      |
|------|---|------|------|--------|------|------|------|
| 1oq6 | 4 | 0.33 | 0.33 | -0.33  | 1.0  | 1.0  | 1.0  |
| 1nz0 | 4 | 0.33 | 0.33 | -0.33  | 1.0  | 1.0  | 1.0  |
| 1nsk | 4 | 0.33 | 0.33 | -0.33  | 1.0  | 1.0  | 1.0  |
| 1n6z | 4 | 0.33 | 0.33 | -0.17  | 1.0  | 1.0  | 1.0  |
| 1mg4 | 4 | 0.33 | 0.33 | -0.17  | 0.67 | 0.67 | 0.33 |
| 1lq9 | 4 | 0.33 | 0.33 | -0.33  | 1.0  | 1.0  | 1.0  |
| 1jru | 4 | 0.33 | 0.33 | -0.067 | 0.67 | 0.67 | 0.33 |
| 1jj4 | 4 | 0.33 | 0.33 | -0.33  | 0.67 | 0.67 | 0.33 |
| 1iuj | 4 | 0.33 | 0.33 | -0.33  | 0.67 | 0.67 | 0.33 |
| 1ip9 | 4 | 0.33 | 0.5  | 0.091  | 1.0  | 1.0  | 1.0  |
| 1d9a | 4 | 0.33 | 0.33 | -0.33  | 0.67 | 0.67 | 0.33 |
| 1cse | 4 | 0.33 | 0.33 | -0.17  | 0.67 | 0.67 | 0.42 |
| 1afp | 4 | 0.33 | 0.33 | -0.33  | 1.0  | 1.0  | 1.0  |
| 3d0f | 5 | 1.0  | 1.0  | 1.0    | 1.0  | 1.0  | 1.0  |
| 3b7c | 5 | 1.0  | 1.0  | 1.0    | 1.0  | 1.0  | 1.0  |
| 2v0u | 5 | 1.0  | 0.75 | 0.8    | 1.0  | 0.75 | 0.8  |
| 2p1j | 5 | 1.0  | 0.75 | 0.8    | 1.0  | 0.75 | 0.8  |
| 2p0q | 5 | 1.0  | 1.0  | 1.0    | 1.0  | 1.0  | 1.0  |
| 2ot2 | 5 | 1.0  | 0.8  | 0.82   | 1.0  | 0.8  | 0.82 |
| 2oik | 5 | 1.0  | 1.0  | 1.0    | 1.0  | 0.75 | 0.8  |
| 2oct | 5 | 1.0  | 1.0  | 1.0    | 1.0  | 1.0  | 1.0  |
| 2o9u | 5 | 1.0  | 1.0  | 1.0    | 1.0  | 1.0  | 1.0  |
| 2jvr | 5 | 1.0  | 1.0  | 1.0    | 1.0  | 1.0  | 1.0  |
| 2juf | 5 | 1.0  | 1.0  | 1.0    | 1.0  | 1.0  | 1.0  |
| 2j3t | 5 | 1.0  | 1.0  | 1.0    | 1.0  | 1.0  | 1.0  |
| 2j3t | 5 | 1.0  | 1.0  | 1.0    | 1.0  | 1.0  | 1.0  |

|      |   |     |     |     |     |      |     |
|------|---|-----|-----|-----|-----|------|-----|
| 2ia1 | 5 | 1.0 | 1.0 | 1.0 | 1.0 | 1.0  | 1.0 |
| 2hna | 5 | 1.0 | 1.0 | 1.0 | 1.0 | 1.0  | 1.0 |
| 2gw6 | 5 | 1.0 | 1.0 | 1.0 | 1.0 | 1.0  | 1.0 |
| 2glz | 5 | 1.0 | 1.0 | 1.0 | 1.0 | 1.0  | 1.0 |
| 2gju | 5 | 1.0 | 1.0 | 1.0 | 1.0 | 1.0  | 1.0 |
| 2gj3 | 5 | 1.0 | 1.0 | 1.0 | 1.0 | 0.75 | 0.8 |
| 2fm8 | 5 | 1.0 | 1.0 | 1.0 | 1.0 | 0.75 | 0.8 |
| 2drp | 5 | 1.0 | 1.0 | 1.0 | 1.0 | 1.0  | 1.0 |
| 2aoa | 5 | 1.0 | 1.0 | 1.0 | 1.0 | 1.0  | 1.0 |
| 1zno | 5 | 1.0 | 1.0 | 1.0 | 1.0 | 0.75 | 0.8 |
| 1y4o | 5 | 1.0 | 1.0 | 1.0 | 1.0 | 1.0  | 1.0 |
| 1xmt | 5 | 1.0 | 1.0 | 1.0 | 1.0 | 1.0  | 1.0 |
| 1x0o | 5 | 1.0 | 1.0 | 1.0 | 1.0 | 1.0  | 1.0 |
| 1v5r | 5 | 1.0 | 1.0 | 1.0 | 1.0 | 0.75 | 0.8 |
| 1vlj | 5 | 1.0 | 1.0 | 1.0 | 1.0 | 1.0  | 1.0 |
| 1uw0 | 5 | 1.0 | 1.0 | 1.0 | 1.0 | 1.0  | 1.0 |
| 1ugl | 5 | 1.0 | 1.0 | 1.0 | 1.0 | 0.75 | 0.8 |
| 1u5m | 5 | 1.0 | 1.0 | 1.0 | 1.0 | 1.0  | 1.0 |
| 1tot | 5 | 1.0 | 1.0 | 1.0 | 1.0 | 1.0  | 1.0 |
| 1t3g | 5 | 1.0 | 1.0 | 1.0 | 1.0 | 1.0  | 1.0 |
| 1sbx | 5 | 1.0 | 1.0 | 1.0 | 1.0 | 1.0  | 1.0 |
| 1s28 | 5 | 1.0 | 1.0 | 1.0 | 1.0 | 0.75 | 0.8 |
| 1rk8 | 5 | 1.0 | 1.0 | 1.0 | 1.0 | 1.0  | 1.0 |
| 1nwz | 5 | 1.0 | 1.0 | 1.0 | 1.0 | 0.75 | 0.8 |
| 1l8r | 5 | 1.0 | 1.0 | 1.0 | 1.0 | 1.0  | 1.0 |
| 1kq1 | 5 | 1.0 | 1.0 | 1.0 | 1.0 | 1.0  | 1.0 |

|      |   |      |      |      |      |      |      |
|------|---|------|------|------|------|------|------|
| 1jyo | 5 | 1.0  | 1.0  | 1.0  | 1.0  | 1.0  | 1.0  |
| 1jrm | 5 | 1.0  | 1.0  | 1.0  | 1.0  | 1.0  | 1.0  |
| 1jc7 | 5 | 1.0  | 0.6  | 0.65 | 1.0  | 0.6  | 0.65 |
| 1fgp | 5 | 1.0  | 1.0  | 1.0  | 1.0  | 1.0  | 1.0  |
| 1dqc | 5 | 1.0  | 1.0  | 1.0  | 1.0  | 1.0  | 1.0  |
| 1dch | 5 | 1.0  | 1.0  | 1.0  | 1.0  | 1.0  | 1.0  |
| 1d0q | 5 | 1.0  | 1.0  | 1.0  | 1.0  | 0.75 | 0.8  |
| 1c9o | 5 | 1.0  | 1.0  | 1.0  | 1.0  | 1.0  | 1.0  |
| 1bvy | 5 | 1.0  | 1.0  | 1.0  | 1.0  | 0.75 | 0.8  |
| 3eoi | 5 | 0.75 | 0.75 | 0.58 | 1.0  | 0.75 | 0.8  |
| 3dwm | 5 | 0.75 | 0.75 | 0.61 | 1.0  | 0.75 | 0.8  |
| 3do9 | 5 | 0.75 | 0.75 | 0.61 | 1.0  | 0.75 | 0.8  |
| 3dnx | 5 | 0.75 | 0.75 | 0.61 | 1.0  | 1.0  | 1.0  |
| 3c5k | 5 | 0.75 | 0.75 | 0.58 | 1.0  | 1.0  | 1.0  |
| 3c4s | 5 | 0.75 | 0.75 | 0.58 | 1.0  | 0.75 | 0.8  |
| 3bvp | 5 | 0.75 | 0.75 | 0.58 | 1.0  | 1.0  | 1.0  |
| 3bn8 | 5 | 0.75 | 0.75 | 0.58 | 1.0  | 1.0  | 1.0  |
| 3bjk | 5 | 0.75 | 0.75 | 0.58 | 1.0  | 1.0  | 1.0  |
| 3bdu | 5 | 0.75 | 1.0  | 0.8  | 1.0  | 1.0  | 1.0  |
| 2zej | 5 | 0.75 | 1.0  | 0.8  | 0.75 | 1.0  | 0.8  |
| 2z5v | 5 | 0.75 | 0.75 | 0.61 | 1.0  | 1.0  | 1.0  |
| 2vy8 | 5 | 0.75 | 1.0  | 0.8  | 1.0  | 1.0  | 1.0  |
| 2vxf | 5 | 0.75 | 0.75 | 0.58 | 0.75 | 0.75 | 0.58 |
| 2vlg | 5 | 0.75 | 0.75 | 0.58 | 1.0  | 1.0  | 1.0  |
| 2rjz | 5 | 0.75 | 0.75 | 0.58 | 1.0  | 1.0  | 1.0  |
| 2r2z | 5 | 0.75 | 0.75 | 0.58 | 1.0  | 1.0  | 1.0  |

|      |   |      |      |      |      |      |      |
|------|---|------|------|------|------|------|------|
| 2qv0 | 5 | 0.75 | 0.75 | 0.61 | 1.0  | 1.0  | 1.0  |
| 2qtx | 5 | 0.75 | 0.75 | 0.58 | 1.0  | 1.0  | 1.0  |
| 2qlv | 5 | 0.75 | 0.75 | 0.58 | 1.0  | 1.0  | 1.0  |
| 2qhk | 5 | 0.75 | 0.75 | 0.58 | 1.0  | 0.75 | 0.8  |
| 2qdy | 5 | 0.75 | 0.75 | 0.61 | 1.0  | 1.0  | 1.0  |
| 2q3v | 5 | 0.75 | 0.75 | 0.58 | 0.75 | 0.75 | 0.58 |
| 2pls | 5 | 0.75 | 0.75 | 0.58 | 1.0  | 1.0  | 1.0  |
| 2pfu | 5 | 0.75 | 0.75 | 0.61 | 1.0  | 0.75 | 0.8  |
| 2p92 | 5 | 0.75 | 0.75 | 0.58 | 0.75 | 0.75 | 0.58 |
| 2o9s | 5 | 0.75 | 0.75 | 0.58 | 1.0  | 0.75 | 0.8  |
| 2o90 | 5 | 0.75 | 0.75 | 0.61 | 0.75 | 0.75 | 0.61 |
| 2ns5 | 5 | 0.75 | 0.75 | 0.58 | 1.0  | 1.0  | 1.0  |
| 2nqw | 5 | 0.75 | 0.75 | 0.58 | 1.0  | 1.0  | 1.0  |
| 2k4v | 5 | 0.75 | 0.75 | 0.58 | 1.0  | 1.0  | 1.0  |
| 2k3d | 5 | 0.75 | 0.75 | 0.58 | 1.0  | 1.0  | 1.0  |
| 2jtm | 5 | 0.75 | 1.0  | 0.8  | 1.0  | 1.0  | 1.0  |
| 2jtf | 5 | 0.75 | 0.75 | 0.58 | 1.0  | 1.0  | 1.0  |
| 2jny | 5 | 0.75 | 0.75 | 0.58 | 1.0  | 0.75 | 0.8  |
| 2i5h | 5 | 0.75 | 0.75 | 0.58 | 1.0  | 1.0  | 1.0  |
| 2hvv | 5 | 0.75 | 0.75 | 0.58 | 1.0  | 0.75 | 0.8  |
| 2gyb | 5 | 0.75 | 0.75 | 0.61 | 1.0  | 0.75 | 0.8  |
| 2gkg | 5 | 0.75 | 0.75 | 0.61 | 0.75 | 0.61 | 0.75 |
| 2gcx | 5 | 0.75 | 0.75 | 0.58 | 1.0  | 1.0  | 1.0  |
| 2fz0 | 5 | 0.75 | 0.75 | 0.61 | 1.0  | 1.0  | 1.0  |
| 2fr5 | 5 | 0.75 | 0.75 | 0.61 | 1.0  | 0.75 | 0.8  |
| 2fpe | 5 | 0.75 | 0.75 | 0.58 | 1.0  | 0.75 | 0.8  |

|      |   |      |      |      |     |      |     |
|------|---|------|------|------|-----|------|-----|
| 2fio | 5 | 0.75 | 0.75 | 0.58 | 1.0 | 1.0  | 1.0 |
| 2fhz | 5 | 0.75 | 0.75 | 0.58 | 1.0 | 1.0  | 1.0 |
| 2fhz | 5 | 0.75 | 0.75 | 0.58 | 1.0 | 1.0  | 1.0 |
| 2f5k | 5 | 0.75 | 0.75 | 0.58 | 1.0 | 1.0  | 1.0 |
| 2equ | 5 | 0.75 | 0.75 | 0.58 | 1.0 | 1.0  | 1.0 |
| 2ejy | 5 | 0.75 | 0.75 | 0.58 | 1.0 | 1.0  | 1.0 |
| 2e70 | 5 | 0.75 | 0.75 | 0.58 | 1.0 | 1.0  | 1.0 |
| 2dtt | 5 | 0.75 | 0.75 | 0.58 | 1.0 | 1.0  | 1.0 |
| 2r2z | 5 | 0.75 | 0.75 | 0.58 | 1.0 | 1.0  | 1.0 |
| 2dig | 5 | 0.75 | 0.75 | 0.58 | 1.0 | 1.0  | 1.0 |
| 2d0p | 5 | 0.75 | 0.75 | 0.58 | 1.0 | 1.0  | 1.0 |
| 2czv | 5 | 0.75 | 0.75 | 0.58 | 1.0 | 1.0  | 1.0 |
| 2cw9 | 5 | 0.75 | 0.75 | 0.58 | 1.0 | 0.75 | 0.8 |
| 2c60 | 5 | 0.75 | 0.75 | 0.58 | 1.0 | 1.0  | 1.0 |
| 2bwf | 5 | 0.75 | 0.75 | 0.58 | 1.0 | 0.75 | 0.8 |
| 2bud | 5 | 0.75 | 0.75 | 0.58 | 1.0 | 1.0  | 1.0 |
| 2be3 | 5 | 0.75 | 0.75 | 0.61 | 1.0 | 0.75 | 0.8 |
| 2b8a | 5 | 0.75 | 0.75 | 0.58 | 1.0 | 1.0  | 1.0 |
| 2b7l | 5 | 0.75 | 0.75 | 0.58 | 1.0 | 0.75 | 0.8 |
| 2b4a | 5 | 0.75 | 0.75 | 0.61 | 1.0 | 1.0  | 1.0 |
| 2a7y | 5 | 0.75 | 0.75 | 0.58 | 1.0 | 1.0  | 1.0 |
| 1yop | 5 | 0.75 | 1.0  | 0.8  | 1.0 | 1.0  | 1.0 |
| 1y96 | 5 | 0.75 | 0.75 | 0.58 | 1.0 | 1.0  | 1.0 |
| 1y7l | 5 | 0.75 | 0.75 | 0.58 | 1.0 | 1.0  | 1.0 |
| 1xyi | 5 | 0.75 | 1.0  | 0.8  | 1.0 | 1.0  | 1.0 |
| 1ouz | 5 | 0.75 | 1.0  | 0.8  | 1.0 | 1.0  | 1.0 |

|       |   |      |      |      |      |      |      |
|-------|---|------|------|------|------|------|------|
| 1x69  | 5 | 0.75 | 0.75 | 0.61 | 1.0  | 1.0  | 1.0  |
| 1wmi  | 5 | 0.75 | 0.75 | 0.61 | 1.0  | 1.0  | 1.0  |
| 1wm3  | 5 | 0.75 | 0.75 | 0.58 | 1.0  | 1.0  | 1.0  |
| 1wjrr | 5 | 0.75 | 1.0  | 0.8  | 1.0  | 1.0  | 1.0  |
| 1vcc  | 5 | 0.75 | 0.75 | 0.61 | 1.0  | 1.0  | 1.0  |
| 1v9y  | 5 | 0.75 | 0.75 | 0.61 | 1.0  | 0.75 | 0.8  |
| 1v95  | 5 | 0.75 | 0.75 | 0.58 | 1.0  | 1.0  | 1.0  |
| 1uoy  | 5 | 0.75 | 1.0  | 0.8  | 1.0  | 1.0  | 1.0  |
| 1tpn  | 5 | 0.75 | 1.0  | 0.8  | 1.0  | 1.0  | 1.0  |
| 1th7  | 5 | 0.75 | 0.75 | 0.61 | 1.0  | 1.0  | 1.0  |
| 1t6s  | 5 | 0.75 | 1.0  | 0.8  | 0.75 | 1.0  | 0.8  |
| 1t62  | 5 | 0.75 | 0.75 | 0.58 | 1.0  | 1.0  | 1.0  |
| 1szv  | 5 | 0.75 | 0.75 | 0.58 | 1.0  | 0.75 | 0.8  |
| 1sjw  | 5 | 0.75 | 0.75 | 0.58 | 1.0  | 1.0  | 1.0  |
| 1s5u  | 5 | 0.75 | 0.75 | 0.58 | 0.75 | 0.75 | 0.58 |
| 1qmc  | 5 | 0.75 | 0.75 | 0.58 | 1.0  | 1.0  | 1.0  |
| 1ouz  | 5 | 0.75 | 1.0  | 0.8  | 1.0  | 1.0  | 1.0  |
| 1o50  | 5 | 0.75 | 1.0  | 0.8  | 1.0  | 1.0  | 1.0  |
| 1o26  | 5 | 0.75 | 0.75 | 0.61 | 1.0  | 1.0  | 1.0  |
| 1nz9  | 5 | 0.75 | 0.75 | 0.58 | 1.0  | 1.0  | 1.0  |
| 1nrv  | 5 | 0.75 | 0.75 | 0.58 | 0.75 | 0.75 | 0.61 |
| 1mwj  | 5 | 0.75 | 0.75 | 0.58 | 1.0  | 1.0  | 1.0  |
| 1muz  | 5 | 0.75 | 0.75 | 0.58 | 1.0  | 1.0  | 1.0  |
| 1m4j  | 5 | 0.75 | 0.75 | 0.61 | 1.0  | 1.0  | 1.0  |
| 1m2f  | 5 | 0.75 | 0.75 | 0.61 | 0.75 | 0.75 | 0.58 |
| 1m2d  | 5 | 0.75 | 0.75 | 0.61 | 0.75 | 0.75 | 0.61 |

|      |   |      |      |      |      |      |      |
|------|---|------|------|------|------|------|------|
| 1jwa | 5 | 0.75 | 0.75 | 0.61 | 0.75 | 0.75 | 0.58 |
| 1jl1 | 5 | 0.75 | 0.75 | 0.58 | 1.0  | 0.75 | 0.8  |
| 1jeo | 5 | 0.75 | 0.75 | 0.61 | 0.75 | 0.75 | 0.61 |
| 2gyb | 5 | 0.75 | 0.75 | 0.61 | 1.0  | 0.75 | 0.8  |
| 1jbe | 5 | 0.75 | 0.75 | 0.61 | 0.75 | 1.0  | 0.8  |
| liou | 5 | 0.75 | 0.75 | 0.58 | 1.0  | 0.75 | 0.8  |
| 1hxv | 5 | 0.75 | 0.75 | 0.58 | 1.0  | 1.0  | 1.0  |
| 1hkq | 5 | 0.75 | 1.0  | 0.8  | 0.75 | 1.0  | 0.8  |
| 1h4x | 5 | 0.75 | 0.75 | 0.61 | 0.75 | 0.75 | 0.58 |
| 1h3z | 5 | 0.75 | 0.75 | 0.58 | 0.75 | 0.75 | 0.58 |
| 1h3q | 5 | 0.75 | 0.75 | 0.58 | 1.0  | 0.75 | 0.8  |
| 1gxu | 5 | 0.75 | 0.75 | 0.58 | 0.75 | 0.75 | 0.58 |
| 1gh8 | 5 | 0.75 | 0.75 | 0.61 | 1.0  | 1.0  | 1.0  |
| 1g4f | 5 | 0.75 | 1.0  | 0.8  | 1.0  | 1.0  | 1.0  |
| 1f51 | 5 | 0.75 | 0.75 | 0.61 | 0.75 | 0.75 | 0.61 |
| 1def | 5 | 0.75 | 0.75 | 0.61 | 0.75 | 0.75 | 0.61 |
| 1cxq | 5 | 0.75 | 0.75 | 0.61 | 1.0  | 0.75 | 0.8  |
| 1bj8 | 5 | 0.75 | 1.0  | 0.8  | 1.0  | 1.0  | 1.0  |
| 1b1a | 5 | 0.75 | 0.75 | 0.58 | 1.0  | 1.0  | 1.0  |
| 1aps | 5 | 0.75 | 0.75 | 0.58 | 1.0  | 1.0  | 1.0  |
| 2w0n | 5 | 0.67 | 0.67 | 0.54 | 1.0  | 1.0  | 1.0  |
| 1vd4 | 5 | 0.67 | 0.67 | 0.52 | 1.0  | 1.0  | 1.0  |
| 1pco | 5 | 0.67 | 0.67 | 0.52 | 1.0  | 1.0  | 1.0  |
| 1oey | 5 | 0.67 | 0.5  | 0.39 | 1.0  | 1.0  | 1.0  |
| 1f71 | 5 | 0.67 | 0.5  | 0.36 | 1.0  | 0.75 | 0.8  |
| 3dkm | 5 | 0.5  | 0.5  | 0.17 | 1.0  | 1.0  | 1.0  |



|      |   |     |      |      |      |      |      |
|------|---|-----|------|------|------|------|------|
| 3dbo | 5 | 0.5 | 0.5  | 0.17 | 1.0  | 1.0  | 1.0  |
| 3cfy | 5 | 0.5 | 0.5  | 0.25 | 0.5  | 0.5  | 0.17 |
| 3bps | 5 | 0.5 | 0.5  | 0.17 | 0.75 | 0.75 | 0.58 |
| 2ze8 | 5 | 0.5 | 0.5  | 0.17 | 0.75 | 0.75 | 0.58 |
| 2yx6 | 5 | 0.5 | 0.5  | 0.21 | 0.67 | 0.5  | 0.39 |
| 2vil | 5 | 0.5 | 0.5  | 0.25 | 0.75 | 0.75 | 0.61 |
| 2uwq | 5 | 0.5 | 0.5  | 0.17 | 0.5  | 0.5  | 0.21 |
| 2qyb | 5 | 0.5 | 0.5  | 0.17 | 0.5  | 0.5  | 0.17 |
| 2qr3 | 5 | 0.5 | 0.5  | 0.25 | 0.5  | 0.5  | 0.21 |
| 2ql8 | 5 | 0.5 | 0.67 | 0.39 | 0.67 | 0.67 | 0.54 |
| 2ql6 | 5 | 0.5 | 0.5  | 0.17 | 0.75 | 0.75 | 0.58 |
| 2pg3 | 5 | 0.5 | 0.5  | 0.21 | 0.75 | 0.75 | 0.58 |
| 2oq3 | 5 | 0.5 | 0.5  | 0.17 | 0.67 | 0.5  | 0.39 |
| 2ooy | 5 | 0.5 | 0.5  | 0.21 | 1.0  | 1.0  | 1.0  |
| 2ogk | 5 | 0.5 | 0.5  | 0.17 | 1.0  | 1.0  | 1.0  |
| 2ogh | 5 | 0.5 | 0.5  | 0.17 | 1.0  | 0.75 | 0.8  |
| 2nlw | 5 | 0.5 | 0.5  | 0.17 | 0.5  | 0.5  | 0.21 |
| 2jyw | 5 | 0.5 | 0.5  | 0.25 | 0.5  | 0.5  | 0.21 |
| 2jvn | 5 | 0.5 | 0.67 | 0.36 | 1.0  | 1.0  | 1.0  |
| 2ju5 | 5 | 0.5 | 0.5  | 0.17 | 0.75 | 0.75 | 0.61 |
| 2jmk | 5 | 0.5 | 0.5  | 0.21 | 0.75 | 0.75 | 0.58 |
| 2jev | 5 | 0.5 | 0.5  | 0.25 | 0.75 | 0.75 | 0.61 |
| 2j8b | 5 | 0.5 | 0.67 | 0.36 | 0.75 | 1.0  | 0.8  |
| 2j8a | 5 | 0.5 | 0.5  | 0.17 | 1.0  | 1.0  | 1.0  |
| 2j6b | 5 | 0.5 | 0.5  | 0.17 | 0.5  | 0.5  | 0.21 |
| 2ipq | 5 | 0.5 | 0.5  | 0.17 | 1.0  | 1.0  | 1.0  |

|      |   |     |      |      |      |      |      |
|------|---|-----|------|------|------|------|------|
| 2inn | 5 | 0.5 | 0.5  | 0.21 | 0.75 | 0.75 | 0.61 |
| 2iim | 5 | 0.5 | 0.5  | 0.21 | 1.0  | 1.0  | 1.0  |
| 2i9s | 5 | 0.5 | 0.5  | 0.17 | 0.75 | 0.75 | 0.58 |
| 2i4a | 5 | 0.5 | 0.5  | 0.17 | 1.0  | 1.0  | 1.0  |
| 2hqo | 5 | 0.5 | 0.5  | 0.25 | 0.75 | 0.75 | 0.58 |
| 2hhr | 5 | 0.5 | 0.67 | 0.36 | 0.67 | 0.67 | 0.52 |
| 2hjq | 5 | 0.5 | 0.67 | 0.36 | 0.5  | 0.67 | 0.36 |
| 2hgv | 5 | 0.5 | 0.5  | 0.17 | 1.0  | 1.0  | 1.0  |
| 2hfn | 5 | 0.5 | 0.5  | 0.17 | 1.0  | 1.0  | 1.0  |
| 2hfd | 5 | 0.5 | 0.5  | 0.17 | 0.5  | 0.5  | 0.17 |
| 2heq | 5 | 0.5 | 0.5  | 0.21 | 0.75 | 0.75 | 0.61 |
| 2hd7 | 5 | 0.5 | 0.5  | 0.25 | 0.75 | 0.75 | 0.61 |
| 2grj | 5 | 0.5 | 0.5  | 0.17 | 0.75 | 0.75 | 0.58 |
| 2fps | 5 | 0.5 | 0.5  | 0.21 | 0.75 | 0.75 | 0.58 |
| 2fb6 | 5 | 0.5 | 0.5  | 0.17 | 0.75 | 0.75 | 0.61 |
| 2ers | 5 | 0.5 | 0.67 | 0.36 | 0.5  | 0.67 | 0.36 |
| 2ekh | 5 | 0.5 | 0.5  | 0.21 | 1.0  | 1.0  | 1.0  |
| 2egi | 5 | 0.5 | 0.5  | 0.17 | 1.0  | 1.0  | 1.0  |
| 2ege | 5 | 0.5 | 0.5  | 0.21 | 1.0  | 1.0  | 1.0  |
| 2e79 | 5 | 0.5 | 0.5  | 0.17 | 0.75 | 0.75 | 0.58 |
| 1mkk | 5 | 0.5 | 0.5  | 0.17 | 0.75 | 0.75 | 0.58 |
| 2e2z | 5 | 0.5 | 0.67 | 0.36 | 0.75 | 0.75 | 0.58 |
| 2dum | 5 | 0.5 | 0.5  | 0.21 | 0.75 | 0.75 | 0.58 |
| 2dgx | 5 | 0.5 | 0.5  | 0.17 | 1.0  | 1.0  | 1.0  |
| 2dbc | 5 | 0.5 | 0.5  | 0.25 | 0.5  | 0.5  | 0.17 |
| 2csq | 5 | 0.5 | 0.5  | 0.21 | 1.0  | 1.0  | 1.0  |

|      |   |     |      |       |      |      |      |
|------|---|-----|------|-------|------|------|------|
| 2byf | 5 | 0.5 | 0.5  | 0.17  | 0.5  | 0.5  | 0.21 |
| 2bye | 5 | 0.5 | 0.67 | 0.36  | 0.5  | 0.67 | 0.36 |
| 2btt | 5 | 0.5 | 0.5  | 0.21  | 1.0  | 1.0  | 1.0  |
| 2bsq | 5 | 0.5 | 0.5  | 0.25  | 0.67 | 0.5  | 0.39 |
| 2ayy | 5 | 0.5 | 0.5  | 0.25  | 0.5  | 0.5  | 0.25 |
| 2ayd | 5 | 0.5 | 0.5  | 0.21  | 0.75 | 0.75 | 0.58 |
| 2al3 | 5 | 0.5 | 0.5  | 0.25  | 1.0  | 1.0  | 1.0  |
| 2a6q | 5 | 0.5 | 0.5  | 0.17  | 1.0  | 1.0  | 1.0  |
| 2a6q | 5 | 0.5 | 0.5  | 0.17  | 1.0  | 1.0  | 1.0  |
| 1zuu | 5 | 0.5 | 0.67 | 0.36  | 1.0  | 1.0  | 1.0  |
| 1zma | 5 | 0.5 | 0.5  | 0.17  | 0.5  | 0.5  | 0.21 |
| 1zlh | 5 | 0.5 | 0.67 | 0.36  | 0.75 | 1.0  | 0.8  |
| 1z1d | 5 | 0.5 | 0.5  | 0.21  | 0.5  | 0.5  | 0.21 |
| 1z1d | 5 | 0.5 | 0.5  | 0.21  | 0.75 | 0.75 | 0.58 |
| 1x5p | 5 | 0.5 | 0.5  | 0.17  | 0.75 | 0.75 | 0.58 |
| 1wxv | 5 | 0.5 | 0.5  | 0.17  | 0.75 | 0.75 | 0.58 |
| 1wx7 | 5 | 0.5 | 0.5  | 0.25  | 0.75 | 0.75 | 0.58 |
| 1wvr | 5 | 0.5 | 0.5  | 0.21  | 0.67 | 0.5  | 0.39 |
| 1wmh | 5 | 0.5 | 0.5  | 0.21  | 0.75 | 0.75 | 0.61 |
| 1wmh | 5 | 0.5 | 0.5  | 0.21  | 0.75 | 0.75 | 0.61 |
| 1wjj | 5 | 0.5 | 0.4  | 0.069 | 0.75 | 0.6  | 0.45 |
| 1wif | 5 | 0.5 | 0.67 | 0.39  | 0.75 | 0.75 | 0.58 |
| 1wgl | 5 | 0.5 | 0.5  | 0.17  | 0.75 | 0.75 | 0.58 |
| 1we7 | 5 | 0.5 | 0.5  | 0.21  | 1.0  | 0.75 | 0.8  |
| 1vyc | 5 | 0.5 | 0.67 | 0.36  | 0.5  | 0.67 | 0.36 |
| 1v9w | 5 | 0.5 | 0.5  | 0.17  | 1.0  | 1.0  | 1.0  |

|      |   |     |      |      |      |      |      |
|------|---|-----|------|------|------|------|------|
| 1v6p | 5 | 0.5 | 0.67 | 0.36 | 1.0  | 1.0  | 1.0  |
| 1v1c | 5 | 0.5 | 0.5  | 0.21 | 1.0  | 1.0  | 1.0  |
| 1uhc | 5 | 0.5 | 0.5  | 0.21 | 1.0  | 1.0  | 1.0  |
| 1u5s | 5 | 0.5 | 0.5  | 0.21 | 1.0  | 1.0  | 1.0  |
| 1u07 | 5 | 0.5 | 0.67 | 0.36 | 0.5  | 0.67 | 0.36 |
| 1ttn | 5 | 0.5 | 0.5  | 0.25 | 0.75 | 0.75 | 0.58 |
| 1to0 | 5 | 0.5 | 0.5  | 0.17 | 0.5  | 0.5  | 0.17 |
| 1t3o | 5 | 0.5 | 0.67 | 0.39 | 0.75 | 1.0  | 0.8  |
| 1t0g | 5 | 0.5 | 0.5  | 0.17 | 0.5  | 0.5  | 0.17 |
| 1spk | 5 | 0.5 | 0.5  | 0.21 | 1.0  | 1.0  | 1.0  |
| 1sn8 | 5 | 0.5 | 0.4  | 0    | 1.0  | 0.8  | 0.82 |
| 1s60 | 5 | 0.5 | 0.5  | 0.25 | 1.0  | 1.0  | 1.0  |
| 1ryl | 5 | 0.5 | 0.5  | 0.25 | 1.0  | 1.0  | 1.0  |
| 1rdu | 5 | 0.5 | 0.5  | 0.21 | 0.67 | 0.5  | 0.39 |
| 1qp3 | 5 | 0.5 | 0.5  | 0.21 | 1.0  | 1.0  | 1.0  |
| 1tev | 5 | 0.5 | 0.5  | 0.21 | 0.67 | 0.5  | 0.39 |
| 1qmp | 5 | 0.5 | 0.5  | 0.17 | 0.67 | 0.5  | 0.39 |
| 1qgv | 5 | 0.5 | 0.5  | 0.21 | 0.5  | 0.5  | 0.17 |
| 1pz4 | 5 | 0.5 | 0.5  | 0.25 | 0.75 | 0.75 | 0.58 |
| 1p6o | 5 | 0.5 | 0.5  | 0.21 | 0.67 | 0.5  | 0.39 |
| 1p5z | 5 | 0.5 | 0.5  | 0.17 | 0.5  | 0.5  | 0.17 |
| 1ovq | 5 | 0.5 | 0.5  | 0.21 | 0.5  | 0.5  | 0.21 |
| 1oft | 5 | 0.5 | 0.5  | 0.21 | 0.75 | 0.75 | 0.61 |
| 1o6b | 5 | 0.5 | 0.5  | 0.21 | 0.75 | 0.75 | 0.61 |
| 1n62 | 5 | 0.5 | 0.5  | 0.17 | 0.75 | 0.75 | 0.58 |
| 1n62 | 5 | 0.5 | 0.5  | 0.17 | 1.0  | 1.0  | 1.0  |

|      |   |      |      |       |      |      |      |
|------|---|------|------|-------|------|------|------|
| 1n5l | 5 | 0.5  | 0.5  | 0.17  | 0.5  | 0.5  | 0.17 |
| 1kuf | 5 | 0.5  | 0.5  | 0.17  | 0.75 | 0.75 | 0.58 |
| 1ktu | 5 | 0.5  | 0.5  | 0.17  | 0.75 | 0.75 | 0.58 |
| 1kq6 | 5 | 0.5  | 0.5  | 0.17  | 1.0  | 1.0  | 1.0  |
| 1kg1 | 5 | 0.5  | 0.67 | 0.36  | 0.67 | 0.67 | 0.52 |
| 1jx7 | 5 | 0.5  | 0.5  | 0.21  | 0.67 | 0.5  | 0.36 |
| 1jt8 | 5 | 0.5  | 0.4  | 0     | 1.0  | 1.0  | 1.0  |
| 1imt | 5 | 0.5  | 0.67 | 0.36  | 0.5  | 0.67 | 0.36 |
| 1igu | 5 | 0.5  | 0.5  | 0.21  | 0.75 | 0.75 | 0.61 |
| 1i35 | 5 | 0.5  | 0.5  | 0.17  | 0.67 | 0.5  | 0.36 |
| 1h8c | 5 | 0.5  | 0.5  | 0.21  | 0.75 | 0.75 | 0.61 |
| 1gh2 | 5 | 0.5  | 0.5  | 0.17  | 0.75 | 0.75 | 0.58 |
| 1fq1 | 5 | 0.5  | 0.5  | 0.17  | 0.75 | 0.75 | 0.58 |
| 1ewi | 5 | 0.5  | 0.67 | 0.36  | 1.0  | 1.0  | 1.0  |
| 1es9 | 5 | 0.5  | 0.5  | 0.21  | 0.75 | 0.75 | 0.58 |
| 1es7 | 5 | 0.5  | 0.67 | 0.36  | 0.67 | 0.67 | 0.52 |
| 1e9m | 5 | 0.5  | 0.5  | 0.17  | 0.5  | 0.5  | 0.21 |
| 1dtd | 5 | 0.5  | 0.5  | 0.17  | 1.0  | 1.0  | 1.0  |
| 1def | 5 | 0.5  | 0.67 | 0.36  | 1.0  | 1.0  | 1.0  |
| 1d4b | 5 | 0.5  | 0.67 | 0.36  | 0.5  | 0.67 | 0.39 |
| 1cuj | 5 | 0.5  | 0.5  | 0.21  | 0.75 | 0.75 | 0.58 |
| 1c7k | 5 | 0.5  | 0.5  | 0.17  | 1.0  | 1.0  | 1.0  |
| 1c05 | 5 | 0.5  | 0.5  | 0.21  | 1.0  | 1.0  | 1.0  |
| 1bym | 5 | 0.5  | 0.5  | 0.21  | 1.0  | 1.0  | 1.0  |
| 1aiw | 5 | 0.5  | 0.67 | 0.36  | 1.0  | 1.0  | 1.0  |
| 1bhu | 5 | 0.33 | 0.33 | 0.048 | 0.67 | 0.67 | 0.52 |

|      |   |      |      |        |      |      |        |
|------|---|------|------|--------|------|------|--------|
| 3cg6 | 5 | 0.25 | 0.25 | -0.25  | 0.5  | 0.5  | 0.17   |
| 2yra | 5 | 0.25 | 0.33 | -0.089 | 0.5  | 0.67 | 0.36   |
| 2jx9 | 5 | 0.25 | 0.33 | -0.089 | 0.5  | 0.67 | 0.36   |
| 2hw0 | 5 | 0.25 | 0.25 | -0.25  | 1.0  | 1.0  | 1.0    |
| 2fc7 | 5 | 0.25 | 0.33 | -0.089 | 1.0  | 1.0  | 1.0    |
| 2dmz | 5 | 0.25 | 0.33 | -0.039 | 0.75 | 1.0  | 0.8    |
| 2ccg | 5 | 0.25 | 0.25 | -0.18  | 0.5  | 0.5  | 0.17   |
| 2bop | 5 | 0.25 | 0.25 | -0.18  | 0.5  | 0.5  | 0.17   |
| 2b3n | 5 | 0.25 | 0.25 | -0.25  | 0.5  | 0.5  | 0.17   |
| 2a8c | 5 | 0.25 | 0.25 | -0.18  | 0.67 | 0.5  | 0.39   |
| 1yzs | 5 | 0.25 | 0.25 | -0.25  | 0.5  | 0.5  | 0.21   |
| 1wrm | 5 | 0.25 | 0.25 | -0.18  | 0.5  | 0.5  | 0.21   |
| 1wn2 | 5 | 0.25 | 0.25 | -0.18  | 0.5  | 0.5  | 0.21   |
| 1tz0 | 5 | 0.25 | 0.25 | -0.25  | 0.5  | 0.5  | 0.17   |
| 1tq1 | 5 | 0.25 | 0.25 | -0.18  | 0.5  | 0.5  | 0.21   |
| 1ssk | 5 | 0.25 | 0.25 | -0.25  | 0.5  | 0.5  | 0.17   |
| 1rh6 | 5 | 0.25 | 0.33 | -0.089 | 0.5  | 0.67 | 0.36   |
| 1q7l | 5 | 0.25 | 0.25 | -0.18  | 0.67 | 0.67 | 0.54   |
| 1pux | 5 | 0.25 | 0.33 | -0.089 | 0.67 | 0.67 | 0.54   |
| 1prt | 5 | 0.25 | 0.2  | -0.41  | 0.67 | 0.4  | 0.26   |
| 1n13 | 5 | 0.25 | 0.33 | -0.089 | 0.5  | 0.67 | 0.36   |
| 1lls | 5 | 0.25 | 0.25 | -0.18  | 0.33 | 0.25 | -0.039 |
| 1fzt | 5 | 0.25 | 0.25 | -0.25  | 0.5  | 0.5  | 0.17   |
| 1f08 | 5 | 0.25 | 0.25 | -0.25  | 0.5  | 0.5  | 0.17   |
| 1a0r | 5 | 0.25 | 0.25 | -0.18  | 0.5  | 0.5  | 0.25   |
| 3edo | 6 | 1.0  | 1.0  | 1.0    | 1.0  | 1.0  | 1.0    |

|      |   |     |      |      |     |      |      |
|------|---|-----|------|------|-----|------|------|
| 2row | 6 | 1.0 | 1.0  | 1.0  | 1.0 | 1.0  | 1.0  |
| 2rng | 6 | 1.0 | 1.0  | 1.0  | 1.0 | 1.0  | 1.0  |
| 2qzf | 6 | 1.0 | 1.0  | 1.0  | 1.0 | 1.0  | 1.0  |
| 2qgx | 6 | 1.0 | 1.0  | 1.0  | 1.0 | 1.0  | 1.0  |
| 3ddv | 6 | 1.0 | 0.8  | 0.85 | 1.0 | 0.8  | 0.85 |
| 2p19 | 6 | 1.0 | 0.8  | 0.85 | 1.0 | 0.8  | 0.85 |
| 2ogg | 6 | 1.0 | 0.8  | 0.85 | 1.0 | 0.8  | 0.85 |
| 2ijr | 6 | 1.0 | 0.8  | 0.85 | 1.0 | 0.8  | 0.85 |
| 2ia9 | 6 | 1.0 | 1.0  | 1.0  | 1.0 | 1.0  | 1.0  |
| 2ht6 | 6 | 1.0 | 0.8  | 0.85 | 1.0 | 0.8  | 0.85 |
| 2hh8 | 6 | 1.0 | 0.8  | 0.85 | 1.0 | 0.8  | 0.85 |
| 2ewc | 6 | 1.0 | 0.8  | 0.85 | 1.0 | 0.8  | 0.85 |
| 2bho | 6 | 1.0 | 1.0  | 1.0  | 1.0 | 1.0  | 1.0  |
| 1ywu | 6 | 1.0 | 0.83 | 0.87 | 1.0 | 0.67 | 0.74 |
| 1xn5 | 6 | 1.0 | 1.0  | 1.0  | 1.0 | 1.0  | 1.0  |
| 1v61 | 6 | 1.0 | 1.0  | 1.0  | 1.0 | 1.0  | 1.0  |
| 1tt8 | 6 | 1.0 | 0.8  | 0.85 | 1.0 | 1.0  | 1.0  |
| 1qw2 | 6 | 1.0 | 1.0  | 1.0  | 1.0 | 1.0  | 1.0  |
| 1of5 | 6 | 1.0 | 0.8  | 0.85 | 1.0 | 0.8  | 0.85 |
| 1of5 | 6 | 1.0 | 0.8  | 0.85 | 1.0 | 0.8  | 0.85 |
| 1ly7 | 6 | 1.0 | 1.0  | 1.0  | 1.0 | 0.8  | 0.85 |
| 1kaf | 6 | 1.0 | 1.0  | 1.0  | 1.0 | 1.0  | 1.0  |
| 1hl6 | 6 | 1.0 | 0.8  | 0.85 | 1.0 | 0.8  | 0.85 |
| 1h5p | 6 | 1.0 | 0.8  | 0.85 | 1.0 | 0.6  | 0.71 |
| 1ew4 | 6 | 1.0 | 0.8  | 0.85 | 1.0 | 0.8  | 0.85 |
| 1d4o | 6 | 1.0 | 0.8  | 0.85 | 1.0 | 0.8  | 0.85 |

|      |   |     |      |      |     |      |      |
|------|---|-----|------|------|-----|------|------|
| 1bxn | 6 | 1.0 | 1.0  | 1.0  | 1.0 | 1.0  | 1.0  |
| 1buj | 6 | 1.0 | 1.0  | 1.0  | 1.0 | 1.0  | 1.0  |
| 3dxo | 6 | 0.8 | 0.8  | 0.7  | 1.0 | 1.0  | 1.0  |
| 3chb | 6 | 0.8 | 0.8  | 0.7  | 1.0 | 0.8  | 0.85 |
| 2zpl | 6 | 0.8 | 1.0  | 0.85 | 1.0 | 1.0  | 1.0  |
| 2z13 | 6 | 0.8 | 0.8  | 0.7  | 0.8 | 0.8  | 0.7  |
| 2vc8 | 6 | 0.8 | 0.8  | 0.7  | 0.8 | 0.8  | 0.7  |
| 2qs9 | 6 | 0.8 | 0.8  | 0.71 | 0.8 | 0.8  | 0.7  |
| 2ppn | 6 | 0.8 | 0.8  | 0.7  | 0.8 | 0.8  | 0.7  |
| 2p04 | 6 | 0.8 | 0.8  | 0.7  | 1.0 | 0.8  | 0.85 |
| 2ozx | 6 | 0.8 | 0.8  | 0.7  | 0.8 | 0.8  | 0.7  |
| 2nwi | 6 | 0.8 | 0.8  | 0.7  | 1.0 | 0.8  | 0.85 |
| 2nup | 6 | 0.8 | 0.8  | 0.7  | 0.8 | 0.8  | 0.7  |
| 2k31 | 6 | 0.8 | 0.8  | 0.71 | 1.0 | 1.0  | 1.0  |
| 2jso | 6 | 0.8 | 0.8  | 0.7  | 1.0 | 1.0  | 1.0  |
| 2i6v | 6 | 0.8 | 0.8  | 0.7  | 1.0 | 0.8  | 0.85 |
| 1q6w | 6 | 0.8 | 0.8  | 0.7  | 1.0 | 0.8  | 0.85 |
| 2h28 | 6 | 0.8 | 0.8  | 0.7  | 1.0 | 1.0  | 1.0  |
| 2eey | 6 | 0.8 | 0.8  | 0.7  | 0.8 | 0.8  | 0.7  |
| 2dog | 6 | 0.8 | 0.67 | 0.58 | 0.8 | 0.67 | 0.58 |
| 2czq | 6 | 0.8 | 0.8  | 0.71 | 0.8 | 0.8  | 0.7  |
| 2bny | 6 | 0.8 | 0.8  | 0.7  | 0.8 | 0.8  | 0.7  |
| 2bmo | 6 | 0.8 | 0.8  | 0.7  | 0.8 | 0.8  | 0.7  |
| 2axi | 6 | 0.8 | 1.0  | 0.85 | 0.8 | 1.0  | 0.85 |
| 1yua | 6 | 0.8 | 1.0  | 0.85 | 0.8 | 1.0  | 0.85 |
| 1yr1 | 6 | 0.8 | 0.8  | 0.7  | 1.0 | 1.0  | 1.0  |



|      |   |      |      |      |      |     |      |
|------|---|------|------|------|------|-----|------|
| 1xs0 | 6 | 0.8  | 0.8  | 0.71 | 1.0  | 1.0 | 1.0  |
| 1wxc | 6 | 0.8  | 1.0  | 0.85 | 1.0  | 1.0 | 1.0  |
| 1vhm | 6 | 0.8  | 0.8  | 0.71 | 1.0  | 0.8 | 0.85 |
| 1tii | 6 | 0.8  | 0.8  | 0.7  | 0.8  | 0.8 | 0.7  |
| 1pfs | 6 | 0.8  | 0.8  | 0.7  | 1.0  | 1.0 | 1.0  |
| 1nso | 6 | 0.8  | 1.0  | 0.85 | 1.0  | 1.0 | 1.0  |
| 1nrj | 6 | 0.8  | 0.8  | 0.71 | 1.0  | 0.8 | 0.85 |
| 1hkx | 6 | 0.8  | 0.8  | 0.7  | 1.0  | 1.0 | 1.0  |
| 1ghj | 6 | 0.8  | 0.8  | 0.7  | 0.8  | 0.8 | 0.7  |
| 1mf7 | 6 | 0.8  | 0.8  | 0.71 | 1.0  | 1.0 | 1.0  |
| 1ll8 | 6 | 0.8  | 0.8  | 0.7  | 1.0  | 1.0 | 1.0  |
| 1l3g | 6 | 0.8  | 1.0  | 0.85 | 0.8  | 1.0 | 0.85 |
| 1is7 | 6 | 0.8  | 0.8  | 0.7  | 1.0  | 0.8 | 0.85 |
| 1fe8 | 6 | 0.8  | 0.8  | 0.71 | 1.0  | 1.0 | 1.0  |
| 3dkz | 6 | 0.75 | 0.6  | 0.53 | 1.0  | 0.8 | 0.85 |
| 3b64 | 6 | 0.75 | 0.75 | 0.66 | 1.0  | 1.0 | 1.0  |
| 2qiy | 6 | 0.75 | 0.6  | 0.53 | 1.0  | 0.8 | 0.85 |
| 2p11 | 6 | 0.6  | 0.75 | 0.53 | 1.0  | 0.8 | 0.85 |
| 2j5x | 6 | 0.75 | 0.6  | 0.53 | 1.0  | 0.8 | 0.85 |
| 2imj | 6 | 0.75 | 0.6  | 0.53 | 0.75 | 0.6 | 0.53 |
| 2grg | 6 | 0.75 | 0.6  | 0.53 | 1.0  | 0.8 | 0.85 |
| 2ghf | 6 | 0.75 | 0.75 | 0.66 | 1.0  | 1.0 | 1.0  |
| 1x5r | 6 | 0.75 | 1.0  | 0.83 | 0.75 | 1.0 | 0.83 |
| 1wql | 6 | 0.75 | 0.6  | 0.54 | 0.75 | 0.6 | 0.54 |
| 1vrq | 6 | 0.75 | 0.75 | 0.66 | 1.0  | 1.0 | 1.0  |
| 1vh9 | 6 | 0.75 | 0.6  | 0.53 | 1.0  | 0.8 | 0.85 |

|      |   |      |      |      |      |      |      |
|------|---|------|------|------|------|------|------|
| 1tsf | 6 | 0.75 | 0.6  | 0.53 | 1.0  | 0.8  | 0.85 |
| 1psu | 6 | 0.75 | 0.6  | 0.53 | 1.0  | 0.8  | 0.85 |
| 1oqj | 6 | 0.75 | 0.75 | 0.66 | 1.0  | 0.75 | 0.83 |
| 1mby | 6 | 0.75 | 0.75 | 0.66 | 1.0  | 1.0  | 1.0  |
| 1m6k | 6 | 0.75 | 0.6  | 0.53 | 1.0  | 1.0  | 1.0  |
| 1hfo | 6 | 0.75 | 0.75 | 0.66 | 1.0  | 0.75 | 0.83 |
| 1fl9 | 6 | 0.75 | 0.6  | 0.53 | 1.0  | 0.8  | 0.85 |
| 1a7i | 6 | 0.75 | 1.0  | 0.83 | 1.0  | 1.0  | 1.0  |
| 3er7 | 6 | 0.6  | 0.6  | 0.4  | 1.0  | 1.0  | 1.0  |
| 3ef8 | 6 | 0.6  | 0.6  | 0.4  | 0.6  | 0.6  | 0.4  |
| 3e4g | 6 | 0.6  | 0.6  | 0.42 | 0.75 | 0.6  | 0.54 |
| 3e29 | 6 | 0.6  | 0.6  | 0.4  | 1.0  | 1.0  | 1.0  |
| 2re2 | 6 | 0.6  | 0.6  | 0.42 | 1.0  | 1.0  | 1.0  |
| 2q3g | 6 | 0.6  | 0.75 | 0.54 | 1.0  | 1.0  | 1.0  |
| 2pqj | 6 | 0.6  | 0.6  | 0.43 | 0.75 | 0.6  | 0.53 |
| 2pfi | 6 | 0.6  | 0.75 | 0.54 | 0.6  | 0.75 | 0.53 |
| 2os6 | 6 | 0.6  | 0.75 | 0.54 | 0.8  | 1.0  | 0.85 |
| 2okh | 6 | 0.6  | 0.6  | 0.4  | 0.75 | 0.6  | 0.53 |
| 2ocs | 6 | 0.6  | 0.75 | 0.53 | 0.8  | 1.0  | 0.85 |
| 2k2o | 6 | 0.6  | 0.6  | 0.4  | 0.8  | 0.8  | 0.7  |
| 2k0m | 6 | 0.6  | 0.75 | 0.53 | 0.8  | 1.0  | 0.85 |
| 2iec | 6 | 0.6  | 0.75 | 0.53 | 1.0  | 1.0  | 1.0  |
| 2i9y | 6 | 0.6  | 0.6  | 0.42 | 1.0  | 1.0  | 1.0  |
| 2h41 | 6 | 0.6  | 0.75 | 0.53 | 0.6  | 0.75 | 0.53 |
| 2h3l | 6 | 0.6  | 0.6  | 0.42 | 0.8  | 0.8  | 0.7  |
| 2gzv | 6 | 0.6  | 0.6  | 0.42 | 0.8  | 0.8  | 0.7  |

|      |   |     |      |      |      |      |      |
|------|---|-----|------|------|------|------|------|
| 2g1u | 6 | 0.6 | 0.6  | 0.4  | 0.6  | 0.6  | 0.4  |
| 2emq | 6 | 0.6 | 0.75 | 0.53 | 0.8  | 1.0  | 0.85 |
| 2ehg | 6 | 0.6 | 0.6  | 0.4  | 1.0  | 1.0  | 1.0  |
| 1t3y | 6 | 0.6 | 0.6  | 0.4  | 1.0  | 1.0  | 1.0  |
| 2ehb | 6 | 0.6 | 0.6  | 0.4  | 1.0  | 1.0  | 1.0  |
| 2e12 | 6 | 0.6 | 0.6  | 0.42 | 0.8  | 0.8  | 0.7  |
| 2dtc | 6 | 0.6 | 0.6  | 0.42 | 1.0  | 1.0  | 1.0  |
| 2daz | 6 | 0.6 | 0.75 | 0.53 | 1.0  | 1.0  | 1.0  |
| 2bw2 | 6 | 0.6 | 0.75 | 0.53 | 0.6  | 0.75 | 0.53 |
| 2bjo | 6 | 0.6 | 0.75 | 0.54 | 0.6  | 0.75 | 0.53 |
| 2ahm | 6 | 0.6 | 0.6  | 0.43 | 1.0  | 1.0  | 1.0  |
| 2ab5 | 6 | 0.6 | 0.75 | 0.53 | 0.6  | 0.75 | 0.53 |
| 1zbf | 6 | 0.6 | 0.6  | 0.42 | 0.75 | 0.6  | 0.53 |
| 1xqs | 6 | 0.6 | 0.75 | 0.53 | 0.6  | 0.75 | 0.53 |
| 1xo1 | 6 | 0.6 | 0.6  | 0.4  | 0.75 | 0.6  | 0.53 |
| 1xd3 | 6 | 0.6 | 0.6  | 0.4  | 0.6  | 0.6  | 0.4  |
| 1x45 | 6 | 0.6 | 0.75 | 0.53 | 0.75 | 0.75 | 0.66 |
| 1vr7 | 6 | 0.6 | 0.6  | 0.4  | 1.0  | 0.8  | 0.85 |
| 1ujv | 6 | 0.6 | 0.75 | 0.54 | 0.8  | 1.0  | 0.85 |
| 1sqr | 6 | 0.6 | 0.6  | 0.4  | 0.8  | 0.8  | 0.7  |
| 1sgo | 6 | 0.6 | 0.6  | 0.4  | 0.8  | 0.8  | 0.7  |
| 1s3c | 6 | 0.6 | 0.75 | 0.53 | 0.75 | 0.75 | 0.66 |
| 1ry9 | 6 | 0.6 | 0.6  | 0.4  | 0.6  | 0.6  | 0.4  |
| 1rgx | 6 | 0.6 | 0.75 | 0.53 | 0.75 | 0.75 | 0.66 |
| 1r6j | 6 | 0.6 | 0.75 | 0.54 | 0.8  | 1.0  | 0.85 |
| 1qu9 | 6 | 0.6 | 0.6  | 0.4  | 0.8  | 0.8  | 0.71 |

|      |   |     |      |      |      |      |      |
|------|---|-----|------|------|------|------|------|
| 1qst | 6 | 0.6 | 0.6  | 0.43 | 0.8  | 0.8  | 0.7  |
| 1o7c | 6 | 0.6 | 0.6  | 0.4  | 0.6  | 0.6  | 0.4  |
| 1o08 | 6 | 0.6 | 0.6  | 0.43 | 0.6  | 0.6  | 0.43 |
| 1m5z | 6 | 0.6 | 0.75 | 0.54 | 0.8  | 1.0  | 0.85 |
| 1l0o | 6 | 0.6 | 0.6  | 0.4  | 0.8  | 0.8  | 0.7  |
| 1kpt | 6 | 0.6 | 0.75 | 0.53 | 1.0  | 1.0  | 1.0  |
| 1kld | 6 | 0.6 | 1.0  | 0.71 | 1.0  | 1.0  | 1.0  |
| 1k3e | 6 | 0.6 | 0.75 | 0.53 | 0.8  | 1.0  | 0.85 |
| 1i18 | 6 | 0.6 | 0.5  | 0.29 | 1.0  | 0.83 | 0.87 |
| 1g66 | 6 | 0.6 | 0.6  | 0.43 | 0.6  | 0.6  | 0.4  |
| 1f7  | 6 | 0.6 | 1.0  | 0.71 | 0.6  | 1.0  | 0.71 |
| 1dkg | 6 | 0.6 | 0.75 | 0.53 | 0.6  | 0.75 | 0.53 |
| 1aje | 6 | 0.6 | 0.6  | 0.4  | 1.0  | 0.8  | 0.85 |
| 3d9r | 6 | 0.5 | 0.4  | 0.21 | 0.75 | 0.75 | 0.66 |
| 2ywk | 6 | 0.5 | 0.5  | 0.32 | 0.75 | 0.75 | 0.66 |
| 2prx | 6 | 0.5 | 0.4  | 0.21 | 0.8  | 0.8  | 0.7  |
| 2peh | 6 | 0.5 | 0.5  | 0.32 | 0.75 | 0.75 | 0.67 |
| 2o16 | 6 | 0.5 | 0.5  | 0.32 | 0.75 | 0.75 | 0.67 |
| 2j9c | 6 | 0.5 | 0.5  | 0.32 | 1.0  | 1.0  | 1.0  |
| 2iwr | 6 | 0.5 | 0.4  | 0.23 | 0.75 | 0.6  | 0.54 |
| 2h8e | 6 | 0.5 | 0.5  | 0.32 | 0.75 | 0.75 | 0.67 |
| 2ec2 | 6 | 0.5 | 0.5  | 0.32 | 1.0  | 1.0  | 1.0  |
| 2dmc | 6 | 0.5 | 0.5  | 0.32 | 0.5  | 0.5  | 0.32 |
| 2div | 6 | 0.5 | 0.5  | 0.32 | 1.0  | 1.0  | 1.0  |
| 2dit | 6 | 0.5 | 0.5  | 0.32 | 1.0  | 1.0  | 1.0  |
| 2aua | 6 | 0.5 | 0.5  | 0.32 | 1.0  | 1.0  | 1.0  |

|      |   |     |      |      |      |      |      |
|------|---|-----|------|------|------|------|------|
| 2arf | 6 | 0.5 | 0.4  | 0.23 | 0.75 | 0.6  | 0.54 |
| 1wwh | 6 | 0.5 | 0.5  | 0.32 | 1.0  | 1.0  | 1.0  |
| 1wey | 6 | 0.5 | 0.5  | 0.32 | 0.75 | 0.75 | 0.66 |
| 1v30 | 6 | 0.5 | 0.5  | 0.32 | 0.75 | 0.75 | 0.66 |
| 1tp6 | 6 | 0.5 | 0.4  | 0.21 | 0.6  | 0.6  | 0.4  |
| 1q0p | 6 | 0.5 | 0.4  | 0.25 | 0.75 | 0.75 | 0.66 |
| 2k87 | 6 | 0.5 | 0.5  | 0.32 | 0.5  | 0.5  | 0.32 |
| 1pdg | 6 | 0.5 | 0.67 | 0.45 | 0.75 | 1.0  | 0.83 |
| 1gy7 | 6 | 0.5 | 0.4  | 0.21 | 1.0  | 0.8  | 0.85 |
| 1f53 | 6 | 0.5 | 0.5  | 0.32 | 0.75 | 0.75 | 0.66 |
| 4ull | 6 | 0.4 | 0.5  | 0.21 | 0.6  | 0.75 | 0.53 |
| 3vtk | 6 | 0.4 | 0.4  | 0.1  | 0.6  | 0.6  | 0.4  |
| 3eze | 6 | 0.4 | 0.4  | 0.1  | 0.6  | 0.75 | 0.54 |
| 3edh | 6 | 0.4 | 0.5  | 0.23 | 0.6  | 0.75 | 0.54 |
| 3da5 | 6 | 0.4 | 0.4  | 0.13 | 0.8  | 0.8  | 0.7  |
| 3ctu | 6 | 0.4 | 0.5  | 0.21 | 0.8  | 1.0  | 0.85 |
| 3by7 | 6 | 0.4 | 0.4  | 0.1  | 0.6  | 0.6  | 0.4  |
| 3b8f | 6 | 0.4 | 0.4  | 0.13 | 0.6  | 0.6  | 0.42 |
| 2zef | 6 | 0.4 | 0.4  | 0.13 | 0.5  | 0.4  | 0.23 |
| 2z8o | 6 | 0.4 | 0.4  | 0.1  | 0.6  | 0.6  | 0.4  |
| 2v9v | 6 | 0.4 | 0.5  | 0.21 | 0.6  | 0.75 | 0.53 |
| 2uv4 | 6 | 0.4 | 0.5  | 0.23 | 0.5  | 0.5  | 0.32 |
| 2rnk | 6 | 0.4 | 0.5  | 0.21 | 0.6  | 0.75 | 0.53 |
| 2qwz | 6 | 0.4 | 0.4  | 0.1  | 0.8  | 0.8  | 0.7  |
| 2pqx | 6 | 0.4 | 0.5  | 0.21 | 0.8  | 0.8  | 0.7  |
| 2p4v | 6 | 0.4 | 0.5  | 0.21 | 0.4  | 0.5  | 0.21 |

|      |   |     |     |      |     |      |      |
|------|---|-----|-----|------|-----|------|------|
| 2oya | 6 | 0.4 | 0.5 | 0.21 | 0.4 | 0.5  | 0.21 |
| 2o03 | 6 | 0.4 | 0.5 | 0.21 | 0.4 | 0.5  | 0.21 |
| 2k5q | 6 | 0.4 | 0.5 | 0.21 | 0.6 | 0.75 | 0.53 |
| 2jzr | 6 | 0.4 | 0.4 | 0.13 | 0.4 | 0.4  | 0.1  |
| 2hxm | 6 | 0.4 | 0.5 | 0.21 | 1.0 | 1.0  | 1.0  |
| 2hpa | 6 | 0.4 | 0.4 | 0.13 | 0.4 | 0.4  | 0.13 |
| 2hp7 | 6 | 0.4 | 0.4 | 0.1  | 1.0 | 0.8  | 0.85 |
| 2e5o | 6 | 0.4 | 0.4 | 0.13 | 0.6 | 0.6  | 0.42 |
| 2dyt | 6 | 0.4 | 0.4 | 0.15 | 0.6 | 0.6  | 0.43 |
| 2bfw | 6 | 0.4 | 0.4 | 0.15 | 0.4 | 0.4  | 0.13 |
| 2b5x | 6 | 0.4 | 0.4 | 0.13 | 0.6 | 0.6  | 0.4  |
| 2b3d | 6 | 0.4 | 0.4 | 0.13 | 0.5 | 0.4  | 0.21 |
| 1z6i | 6 | 0.4 | 0.4 | 0.1  | 0.6 | 0.6  | 0.4  |
| 1z5f | 6 | 0.4 | 0.5 | 0.21 | 0.5 | 0.5  | 0.32 |
| 1yzv | 6 | 0.4 | 0.4 | 0.13 | 0.6 | 0.6  | 0.43 |
| 1yb0 | 6 | 0.4 | 0.4 | 0.13 | 0.4 | 0.4  | 0.1  |
| 1y5h | 6 | 0.4 | 0.5 | 0.25 | 0.5 | 0.5  | 0.32 |
| 1win | 6 | 0.4 | 0.5 | 0.21 | 0.4 | 0.5  | 0.21 |
| 1ujx | 6 | 0.4 | 0.5 | 0.23 | 0.6 | 0.75 | 0.53 |
| 1t82 | 6 | 0.4 | 0.4 | 0.1  | 0.8 | 0.8  | 0.7  |
| 1s7i | 6 | 0.4 | 0.5 | 0.21 | 0.8 | 1.0  | 0.85 |
| 1pqw | 6 | 0.4 | 0.4 | 0.13 | 0.4 | 0.4  | 0.15 |
| 1ok0 | 6 | 0.4 | 0.5 | 0.21 | 0.4 | 0.5  | 0.21 |
| 1nww | 6 | 0.4 | 0.4 | 0.1  | 0.4 | 0.4  | 0.13 |
| 1nus | 6 | 0.4 | 0.4 | 0.17 | 0.4 | 0.4  | 0.13 |
| 1nf9 | 6 | 0.4 | 0.4 | 0.15 | 0.4 | 0.4  | 0.13 |

|      |   |      |      |        |      |      |      |
|------|---|------|------|--------|------|------|------|
| 1mxi | 6 | 0.4  | 0.4  | 0.13   | 0.5  | 0.4  | 0.21 |
| 1ml8 | 6 | 0.4  | 0.5  | 0.23   | 0.5  | 0.5  | 0.33 |
| 1lkn | 6 | 0.4  | 0.4  | 0.1    | 0.8  | 0.8  | 0.7  |
| 1k8h | 6 | 0.4  | 0.5  | 0.21   | 0.6  | 0.75 | 0.53 |
| 1j22 | 6 | 0.4  | 0.4  | 0.13   | 0.6  | 0.6  | 0.4  |
| 1g10 | 6 | 0.4  | 0.5  | 0.21   | 0.4  | 0.5  | 0.21 |
| 1cjm | 6 | 0.4  | 0.5  | 0.23   | 0.5  | 0.5  | 0.33 |
| 3eli | 6 | 0.25 | 0.25 | -0.023 | 0.5  | 0.5  | 0.32 |
| 2ctt | 6 | 0.25 | 0.33 | 0.075  | 0.5  | 0.67 | 0.45 |
| 1wgp | 6 | 0.25 | 0.25 | -0.023 | 0.75 | 0.75 | 0.66 |
| 1pbu | 6 | 0.25 | 0.2  | -0.078 | 0.5  | 0.4  | 0.21 |
| 1o51 | 6 | 0.25 | 0.25 | 0      | 0.75 | 0.75 | 0.67 |
| 1mhd | 6 | 0.25 | 0.33 | 0.075  | 0.5  | 0.67 | 0.45 |
| 1f94 | 6 | 0.25 | 0.25 | -0.023 | 0.5  | 0.5  | 0.32 |
| 2jvb | 6 | 0.2  | 0.25 | -0.11  | 0.4  | 0.5  | 0.21 |
| 2ii7 | 6 | 0.2  | 0.2  | -0.13  | 0.6  | 0.6  | 0.4  |
| 3d00 | 7 | 1.0  | 1.0  | 1.0    | 1.0  | 1.0  | 1.0  |
| 2vgl | 7 | 1.0  | 1.0  | 1.0    | 1.0  | 0.8  | 0.87 |
| 2v76 | 7 | 1.0  | 0.83 | 0.88   | 1.0  | 0.83 | 0.88 |
| 2rov | 7 | 1.0  | 1.0  | 1.0    | 1.0  | 1.0  | 1.0  |
| 2rnr | 7 | 1.0  | 0.83 | 0.88   | 1.0  | 0.83 | 0.88 |
| 2r9a | 7 | 1.0  | 1.0  | 1.0    | 1.0  | 1.0  | 1.0  |
| 2j97 | 7 | 1.0  | 0.83 | 0.88   | 1.0  | 0.83 | 0.88 |
| 2ivw | 7 | 1.0  | 1.0  | 1.0    | 1.0  | 1.0  | 1.0  |
| 2hti | 7 | 1.0  | 0.83 | 0.88   | 1.0  | 1.0  | 1.0  |
| 2htd | 7 | 1.0  | 0.83 | 0.88   | 1.0  | 0.83 | 0.88 |

|      |   |      |      |      |      |      |      |
|------|---|------|------|------|------|------|------|
| 2ffs | 7 | 1.0  | 0.83 | 0.88 | 1.0  | 0.83 | 0.88 |
| 2cy9 | 7 | 1.0  | 1.0  | 1.0  | 1.0  | 1.0  | 1.0  |
| 2cof | 7 | 1.0  | 0.83 | 0.88 | 1.0  | 0.83 | 0.88 |
| 2bog | 7 | 1.0  | 0.83 | 0.88 | 1.0  | 0.83 | 0.88 |
| 2b79 | 7 | 1.0  | 0.83 | 0.88 | 1.0  | 0.83 | 0.88 |
| 2asf | 7 | 1.0  | 1.0  | 1.0  | 1.0  | 1.0  | 1.0  |
| 1zyi | 7 | 1.0  | 0.83 | 0.88 | 1.0  | 0.83 | 0.88 |
| 1y5o | 7 | 1.0  | 1.0  | 1.0  | 1.0  | 1.0  | 1.0  |
| 1vmh | 7 | 1.0  | 1.0  | 1.0  | 1.0  | 1.0  | 1.0  |
| 1rfe | 7 | 1.0  | 0.83 | 0.88 | 1.0  | 0.83 | 0.88 |
| 1pls | 7 | 1.0  | 0.83 | 0.88 | 1.0  | 0.83 | 0.88 |
| 1ox9 | 7 | 1.0  | 1.0  | 1.0  | 1.0  | 1.0  | 1.0  |
| 1jfm | 7 | 1.0  | 0.83 | 0.88 | 1.0  | 0.83 | 0.88 |
| 1i0v | 7 | 1.0  | 1.0  | 1.0  | 1.0  | 1.0  | 1.0  |
| 1g6e | 7 | 1.0  | 0.83 | 0.88 | 1.0  | 0.83 | 0.88 |
| 1euv | 7 | 1.0  | 1.0  | 1.0  | 1.0  | 1.0  | 1.0  |
| 1ae9 | 7 | 1.0  | 1.0  | 1.0  | 1.0  | 1.0  | 1.0  |
| 2k0q | 7 | 0.83 | 1.0  | 0.88 | 1.0  | 1.0  | 1.0  |
| 2d9r | 7 | 0.83 | 0.83 | 0.77 | 1.0  | 1.0  | 1.0  |
| 2a15 | 7 | 0.83 | 0.83 | 0.77 | 0.83 | 0.83 | 0.77 |
| 1twc | 7 | 0.83 | 1.0  | 0.88 | 1.0  | 1.0  | 1.0  |
| 3dfz | 7 | 0.8  | 0.8  | 0.74 | 0.8  | 0.8  | 0.74 |
| 3db0 | 7 | 0.8  | 0.67 | 0.64 | 1.0  | 1.0  | 1.0  |
| 2z33 | 7 | 0.8  | 0.8  | 0.74 | 1.0  | 1.0  | 1.0  |
| 2vgr | 7 | 0.8  | 0.67 | 0.64 | 1.0  | 0.83 | 0.88 |
| 2v7s | 7 | 0.8  | 0.8  | 0.74 | 1.0  | 1.0  | 1.0  |



|      |   |     |      |      |     |      |      |
|------|---|-----|------|------|-----|------|------|
| 2qkm | 7 | 0.8 | 0.67 | 0.64 | 1.0 | 1.0  | 1.0  |
| 2q7b | 7 | 0.8 | 0.67 | 0.64 | 0.8 | 0.67 | 0.64 |
| 2pth | 7 | 0.8 | 0.67 | 0.64 | 0.8 | 0.67 | 0.64 |
| 2prf | 7 | 0.8 | 0.8  | 0.74 | 1.0 | 0.8  | 0.87 |
| 2plw | 7 | 0.8 | 0.67 | 0.64 | 1.0 | 0.83 | 0.88 |
| 2pkp | 7 | 0.8 | 0.67 | 0.64 | 1.0 | 0.83 | 0.88 |
| 2p14 | 7 | 0.8 | 0.8  | 0.74 | 0.8 | 0.8  | 0.74 |
| 2oqb | 7 | 0.8 | 0.67 | 0.64 | 1.0 | 0.83 | 0.88 |
| 2o99 | 7 | 0.8 | 0.8  | 0.74 | 1.0 | 0.83 | 0.88 |
| 2o30 | 7 | 0.8 | 0.8  | 0.74 | 0.8 | 0.8  | 0.74 |
| 2k49 | 7 | 0.8 | 0.8  | 0.74 | 0.8 | 0.8  | 0.74 |
| 2jpe | 7 | 0.8 | 1.0  | 0.87 | 1.0 | 1.0  | 1.0  |
| 2jop | 7 | 0.8 | 1.0  | 0.87 | 0.8 | 1.0  | 0.87 |
| 2jn9 | 7 | 0.8 | 0.8  | 0.74 | 0.8 | 0.8  | 0.74 |
| 2j8m | 7 | 0.8 | 0.67 | 0.64 | 0.8 | 0.67 | 0.64 |
| 2i5f | 7 | 0.8 | 0.67 | 0.64 | 0.8 | 0.67 | 0.64 |
| 2hpu | 7 | 0.8 | 0.8  | 0.74 | 0.8 | 0.8  | 0.74 |
| 2g35 | 7 | 0.8 | 0.8  | 0.74 | 1.0 | 1.0  | 1.0  |
| 2g0b | 7 | 0.8 | 0.67 | 0.64 | 1.0 | 1.0  | 1.0  |
| 2fhi | 7 | 0.8 | 0.8  | 0.74 | 1.0 | 1.0  | 1.0  |
| 2ela | 7 | 0.8 | 0.67 | 0.64 | 1.0 | 1.0  | 1.0  |
| 2ec1 | 7 | 0.8 | 0.67 | 0.64 | 0.8 | 0.67 | 0.64 |
| 2e6u | 7 | 0.8 | 0.8  | 0.74 | 1.0 | 0.8  | 0.87 |
| 2dkq | 7 | 0.8 | 0.67 | 0.64 | 1.0 | 0.8  | 0.87 |
| 2dg2 | 7 | 0.8 | 0.67 | 0.64 | 0.8 | 0.67 | 0.64 |
| 2da0 | 7 | 0.8 | 0.67 | 0.64 | 0.8 | 0.67 | 0.64 |

|      |   |      |      |      |      |      |      |
|------|---|------|------|------|------|------|------|
| 2bse | 7 | 0.8  | 0.67 | 0.64 | 0.8  | 0.67 | 0.64 |
| 2apn | 7 | 0.8  | 0.8  | 0.74 | 1.0  | 1.0  | 1.0  |
| 2akk | 7 | 0.8  | 0.8  | 0.74 | 1.0  | 1.0  | 1.0  |
| 2aiv | 7 | 0.8  | 0.8  | 0.74 | 1.0  | 1.0  | 1.0  |
| 2adz | 7 | 0.8  | 0.8  | 0.74 | 1.0  | 1.0  | 1.0  |
| 1zr5 | 7 | 0.8  | 0.67 | 0.64 | 1.0  | 1.0  | 1.0  |
| 1yub | 7 | 0.8  | 0.67 | 0.64 | 1.0  | 0.83 | 0.88 |
| 1xke | 7 | 0.8  | 0.67 | 0.64 | 1.0  | 1.0  | 1.0  |
| 1wgv | 7 | 0.8  | 0.8  | 0.74 | 1.0  | 1.0  | 1.0  |
| 1wgu | 7 | 0.8  | 0.67 | 0.64 | 1.0  | 0.83 | 0.88 |
| 1wft | 7 | 0.8  | 0.8  | 0.74 | 1.0  | 0.83 | 0.88 |
| 1upq | 7 | 0.8  | 0.67 | 0.64 | 1.0  | 0.83 | 0.88 |
| 1unq | 7 | 0.8  | 0.67 | 0.64 | 0.8  | 0.67 | 0.64 |
| 1u6l | 7 | 0.8  | 0.8  | 0.74 | 1.0  | 0.83 | 0.88 |
| 1tqz | 7 | 0.8  | 0.67 | 0.64 | 1.0  | 0.83 | 0.88 |
| 1t23 | 7 | 0.8  | 1.0  | 0.87 | 1.0  | 1.0  | 1.0  |
| 1t17 | 7 | 0.8  | 0.67 | 0.64 | 1.0  | 0.83 | 0.88 |
| 1qle | 7 | 0.8  | 1.0  | 0.87 | 0.8  | 1.0  | 0.87 |
| 1q67 | 7 | 0.8  | 0.67 | 0.64 | 1.0  | 0.83 | 0.88 |
| 1m7e | 7 | 0.8  | 0.67 | 0.64 | 1.0  | 0.83 | 0.88 |
| livz | 7 | 0.8  | 0.8  | 0.74 | 1.0  | 1.0  | 1.0  |
| lidp | 7 | 0.8  | 0.67 | 0.64 | 1.0  | 0.83 | 0.88 |
| lgme | 7 | 0.8  | 0.8  | 0.74 | 1.0  | 1.0  | 1.0  |
| 1fwq | 7 | 0.8  | 0.67 | 0.64 | 1.0  | 0.83 | 0.88 |
| 1bsh | 7 | 0.8  | 0.8  | 0.74 | 0.8  | 0.8  | 0.74 |
| 3ci6 | 7 | 0.67 | 0.67 | 0.54 | 0.83 | 0.83 | 0.77 |

|      |   |      |      |      |      |      |      |
|------|---|------|------|------|------|------|------|
| 3bnw | 7 | 0.67 | 0.67 | 0.53 | 1.0  | 0.83 | 0.88 |
| 2v1l | 7 | 0.67 | 0.67 | 0.53 | 1.0  | 0.83 | 0.88 |
| 2jne | 7 | 0.67 | 0.8  | 0.64 | 1.0  | 1.0  | 1.0  |
| 2ge9 | 7 | 0.67 | 0.8  | 0.64 | 0.8  | 0.8  | 0.74 |
| 2car | 7 | 0.67 | 0.67 | 0.54 | 0.83 | 0.83 | 0.77 |
| 2c6u | 7 | 0.67 | 0.67 | 0.53 | 0.83 | 0.83 | 0.77 |
| 1z1s | 7 | 0.67 | 0.67 | 0.54 | 0.8  | 0.67 | 0.64 |
| 1xzq | 7 | 0.67 | 0.67 | 0.53 | 1.0  | 0.83 | 0.88 |
| 1wgq | 7 | 0.67 | 0.67 | 0.53 | 1.0  | 0.83 | 0.88 |
| 1vk0 | 7 | 0.67 | 0.67 | 0.53 | 0.8  | 0.67 | 0.64 |
| 1k85 | 7 | 0.67 | 0.8  | 0.64 | 0.8  | 0.8  | 0.74 |
| 1ipi | 7 | 0.67 | 0.8  | 0.64 | 0.8  | 0.8  | 0.74 |
| 1exc | 7 | 0.67 | 0.67 | 0.54 | 0.8  | 0.67 | 0.64 |
| 3vub | 7 | 0.6  | 0.5  | 0.39 | 0.6  | 0.5  | 0.39 |
| 3e0x | 7 | 0.6  | 0.5  | 0.39 | 0.6  | 0.5  | 0.39 |
| 3dsb | 7 | 0.6  | 0.6  | 0.47 | 0.8  | 0.67 | 0.64 |
| 3dh0 | 7 | 0.6  | 0.5  | 0.39 | 0.8  | 0.67 | 0.64 |
| 3d3s | 7 | 0.6  | 0.5  | 0.39 | 0.8  | 0.67 | 0.64 |
| 3cgy | 7 | 0.6  | 0.6  | 0.47 | 0.8  | 0.8  | 0.74 |
| 3bq8 | 7 | 0.6  | 0.6  | 0.48 | 0.8  | 0.8  | 0.74 |
| 3bf2 | 7 | 0.6  | 0.6  | 0.47 | 0.8  | 0.8  | 0.74 |
| 2ys3 | 7 | 0.6  | 0.6  | 0.47 | 0.75 | 0.6  | 0.58 |
| 2vq8 | 7 | 0.6  | 0.6  | 0.47 | 0.8  | 0.8  | 0.74 |
| 2ron | 7 | 0.6  | 0.5  | 0.39 | 0.8  | 0.67 | 0.64 |
| 2qjl | 7 | 0.6  | 0.6  | 0.49 | 0.75 | 0.6  | 0.59 |
| 2qim | 7 | 0.6  | 0.5  | 0.39 | 0.8  | 0.67 | 0.64 |

|      |   |     |      |      |      |      |      |
|------|---|-----|------|------|------|------|------|
| 2pc1 | 7 | 0.6 | 0.5  | 0.4  | 0.8  | 0.67 | 0.64 |
| 2p7h | 7 | 0.6 | 0.5  | 0.4  | 0.8  | 0.67 | 0.64 |
| 2ore | 7 | 0.6 | 0.5  | 0.39 | 0.8  | 0.67 | 0.64 |
| 2jdc | 7 | 0.6 | 0.5  | 0.4  | 0.8  | 0.67 | 0.64 |
| 2i8g | 7 | 0.6 | 0.5  | 0.39 | 1.0  | 1.0  | 1.0  |
| 2i02 | 7 | 0.6 | 0.6  | 0.48 | 1.0  | 1.0  | 1.0  |
| 2h1d | 7 | 0.6 | 0.5  | 0.4  | 0.6  | 0.5  | 0.39 |
| 2h00 | 7 | 0.6 | 0.5  | 0.4  | 0.8  | 0.67 | 0.64 |
| 2g7j | 7 | 0.6 | 0.6  | 0.47 | 0.8  | 0.8  | 0.74 |
| 2flh | 7 | 0.6 | 0.5  | 0.39 | 0.8  | 0.67 | 0.64 |
| 2fjl | 7 | 0.6 | 0.6  | 0.47 | 0.6  | 0.6  | 0.47 |
| 2ee3 | 7 | 0.6 | 0.6  | 0.47 | 0.75 | 0.6  | 0.58 |
| 2di7 | 7 | 0.6 | 0.75 | 0.58 | 0.8  | 1.0  | 0.87 |
| 2d2a | 7 | 0.6 | 0.6  | 0.47 | 0.8  | 0.8  | 0.74 |
| 2ccv | 7 | 0.6 | 0.6  | 0.47 | 0.8  | 0.8  | 0.74 |
| 2ae6 | 7 | 0.6 | 0.5  | 0.4  | 0.6  | 0.5  | 0.4  |
| 1zvp | 7 | 0.6 | 0.6  | 0.47 | 0.8  | 0.8  | 0.74 |
| 1ys5 | 7 | 0.6 | 0.5  | 0.39 | 0.67 | 0.67 | 0.53 |
| 1wqu | 7 | 0.6 | 0.6  | 0.48 | 0.75 | 0.6  | 0.58 |
| 1whm | 7 | 0.6 | 0.6  | 0.48 | 0.8  | 0.8  | 0.74 |
| 1wek | 7 | 0.6 | 0.5  | 0.4  | 0.8  | 0.8  | 0.74 |
| 1usv | 7 | 0.6 | 0.6  | 0.47 | 0.67 | 0.8  | 0.64 |
| 1ub4 | 7 | 0.6 | 0.5  | 0.39 | 0.8  | 0.8  | 0.74 |
| 1sg5 | 7 | 0.6 | 0.6  | 0.47 | 0.8  | 0.8  | 0.74 |
| 1o5f | 7 | 0.6 | 0.6  | 0.47 | 0.6  | 0.6  | 0.47 |
| 1nub | 7 | 0.6 | 0.75 | 0.58 | 0.8  | 1.0  | 0.87 |

|       |   |     |      |      |      |      |      |
|-------|---|-----|------|------|------|------|------|
| 11le  | 7 | 0.6 | 0.5  | 0.39 | 0.8  | 0.67 | 0.64 |
| 1k7c  | 7 | 0.6 | 0.6  | 0.48 | 0.6  | 0.6  | 0.48 |
| 1jnz  | 7 | 0.6 | 0.75 | 0.58 | 0.6  | 0.75 | 0.58 |
| 1g84  | 7 | 0.6 | 0.6  | 0.47 | 0.8  | 0.8  | 0.74 |
| 1equ  | 7 | 0.6 | 0.5  | 0.41 | 0.6  | 0.5  | 0.4  |
| 1egx  | 7 | 0.6 | 0.5  | 0.39 | 1.0  | 1.0  | 1.0  |
| 1e6v  | 7 | 0.6 | 0.6  | 0.47 | 1.0  | 1.0  | 1.0  |
| 1dy5  | 7 | 0.6 | 0.6  | 0.47 | 0.6  | 0.6  | 0.47 |
| 1d1n  | 7 | 0.6 | 0.6  | 0.47 | 0.8  | 0.8  | 0.74 |
| 1c01  | 7 | 0.6 | 0.6  | 0.47 | 0.8  | 0.8  | 0.74 |
| 1bx d | 7 | 0.6 | 0.6  | 0.47 | 0.8  | 0.8  | 0.74 |
| 1aqz  | 7 | 0.6 | 0.6  | 0.48 | 0.8  | 0.8  | 0.74 |
| 2v3m  | 7 | 0.5 | 0.5  | 0.3  | 0.67 | 0.67 | 0.53 |
| 2ple  | 7 | 0.5 | 0.4  | 0.3  | 0.67 | 0.67 | 0.53 |
| 2o15  | 7 | 0.5 | 0.5  | 0.3  | 0.83 | 0.83 | 0.77 |
| 2if4  | 7 | 0.5 | 0.5  | 0.3  | 0.67 | 0.67 | 0.53 |
| 2gax  | 7 | 0.5 | 0.5  | 0.38 | 0.6  | 0.75 | 0.59 |
| 1zk4  | 7 | 0.5 | 0.5  | 0.32 | 0.67 | 0.67 | 0.54 |
| 1yx0  | 7 | 0.5 | 0.6  | 0.41 | 0.6  | 0.6  | 0.49 |
| 1yhn  | 7 | 0.5 | 0.5  | 0.32 | 0.67 | 0.67 | 0.54 |
| 1yel  | 7 | 0.5 | 0.5  | 0.3  | 0.67 | 0.67 | 0.53 |
| 1ybj  | 7 | 0.5 | 0.5  | 0.3  | 0.67 | 0.67 | 0.53 |
| 1ut4  | 7 | 0.5 | 0.5  | 0.3  | 0.67 | 0.67 | 0.53 |
| 1u5d  | 7 | 0.5 | 0.5  | 0.3  | 0.8  | 0.67 | 0.64 |
| 1o8x  | 7 | 0.5 | 0.5  | 0.3  | 0.6  | 0.5  | 0.39 |
| 1flm  | 7 | 0.5 | 0.5  | 0.3  | 0.67 | 0.67 | 0.54 |

|      |   |      |      |       |     |      |      |
|------|---|------|------|-------|-----|------|------|
| 3ejg | 7 | 0.4  | 0.33 | 0.14  | 0.6 | 0.5  | 0.39 |
| 2qvt | 7 | 0.4  | 0.4  | 0.21  | 0.6 | 0.5  | 0.39 |
| 2pu3 | 7 | 0.4  | 0.5  | 0.31  | 0.4 | 0.5  | 0.31 |
| 2p28 | 7 | 0.4  | 0.5  | 0.3   | 0.5 | 0.5  | 0.38 |
| 2ouc | 7 | 0.4  | 0.4  | 0.21  | 0.4 | 0.4  | 0.22 |
| 2nwu | 7 | 0.4  | 0.5  | 0.31  | 0.4 | 0.5  | 0.31 |
| 2jgb | 7 | 0.4  | 0.33 | 0.14  | 0.6 | 0.5  | 0.39 |
| 2cb9 | 7 | 0.4  | 0.33 | 0.15  | 0.6 | 0.5  | 0.39 |
| 2c71 | 7 | 0.4  | 0.4  | 0.23  | 0.6 | 0.6  | 0.48 |
| 1y93 | 7 | 0.4  | 0.4  | 0.23  | 0.4 | 0.4  | 0.23 |
| 1xiw | 7 | 0.4  | 0.4  | 0.21  | 0.4 | 0.4  | 0.21 |
| 1xer | 7 | 0.4  | 0.4  | 0.21  | 0.6 | 0.6  | 0.47 |
| 1wkt | 7 | 0.4  | 0.4  | 0.21  | 0.6 | 0.6  | 0.47 |
| 1uc6 | 7 | 0.4  | 0.4  | 0.21  | 0.6 | 0.6  | 0.47 |
| 1rki | 7 | 0.4  | 0.4  | 0.21  | 0.6 | 0.6  | 0.47 |
| 1ot4 | 7 | 0.4  | 0.4  | 0.21  | 0.4 | 0.4  | 0.21 |
| 1oa9 | 7 | 0.4  | 0.29 | 0.095 | 0.6 | 0.43 | 0.32 |
| 1mkb | 7 | 0.4  | 0.33 | 0.14  | 0.4 | 0.33 | 0.14 |
| 1lo7 | 7 | 0.4  | 0.33 | 0.15  | 0.8 | 0.67 | 0.64 |
| 1jq7 | 7 | 0.4  | 0.33 | 0.14  | 0.6 | 0.5  | 0.39 |
| 1i1j | 7 | 0.4  | 0.33 | 0.15  | 0.6 | 0.5  | 0.4  |
| 1gn1 | 7 | 0.4  | 0.4  | 0.21  | 0.6 | 0.6  | 0.47 |
| 1gmx | 7 | 0.4  | 0.4  | 0.21  | 0.5 | 0.4  | 0.3  |
| 1egg | 7 | 0.4  | 0.33 | 0.15  | 0.6 | 0.5  | 0.4  |
| 1ckv | 7 | 0.4  | 0.4  | 0.21  | 0.6 | 0.6  | 0.47 |
| 3ceu | 7 | 0.33 | 0.4  | 0.15  | 0.5 | 0.6  | 0.41 |

|      |   |      |      |       |      |      |       |
|------|---|------|------|-------|------|------|-------|
| 2ij9 | 7 | 0.33 | 0.33 | 0.098 | 0.33 | 0.33 | 0.083 |
| 2fvv | 7 | 0.33 | 0.4  | 0.14  | 0.5  | 0.6  | 0.39  |
| 2c8t | 7 | 0.33 | 0.33 | 0.098 | 0.33 | 0.33 | 0.083 |
| 1zce | 7 | 0.33 | 0.33 | 0.083 | 0.33 | 0.33 | 0.083 |
| 1uex | 7 | 0.33 | 0.4  | 0.14  | 0.5  | 0.6  | 0.39  |
| 1rku | 7 | 0.33 | 0.33 | 0.098 | 0.33 | 0.33 | 0.12  |
| 3dl3 | 7 | 0.2  | 0.2  | -0.05 | 0.4  | 0.4  | 0.21  |
| 2j8j | 7 | 0.2  | 0.2  | -0.05 | 0.4  | 0.4  | 0.21  |
| 2hgf | 7 | 0.2  | 0.2  | -0.05 | 0.4  | 0.4  | 0.21  |
| 3d4e | 8 | 1.0  | 0.86 | 0.9   | 1.0  | 0.86 | 0.9   |
| 3c9q | 8 | 1.0  | 1.0  | 1.0   | 1.0  | 1.0  | 1.0   |
| 3b4u | 8 | 1.0  | 0.75 | 0.83  | 1.0  | 0.75 | 0.83  |
| 2r2y | 8 | 1.0  | 0.86 | 0.9   | 1.0  | 0.86 | 0.9   |
| 2qcf | 8 | 1.0  | 0.75 | 0.83  | 1.0  | 0.75 | 0.83  |
| 2okf | 8 | 1.0  | 1.0  | 1.0   | 1.0  | 0.83 | 0.89  |
| 2nvn | 8 | 1.0  | 1.0  | 1.0   | 1.0  | 1.0  | 1.0   |
| 2dch | 8 | 1.0  | 1.0  | 1.0   | 1.0  | 1.0  | 1.0   |
| 1xxm | 8 | 1.0  | 0.86 | 0.9   | 1.0  | 1.0  | 1.0   |
| 1wjm | 8 | 1.0  | 0.86 | 0.9   | 1.0  | 0.86 | 0.9   |
| 1smp | 8 | 1.0  | 0.75 | 0.83  | 1.0  | 0.75 | 0.83  |
| 1sfs | 8 | 1.0  | 0.75 | 0.83  | 1.0  | 0.75 | 0.83  |
| 1npo | 8 | 1.0  | 1.0  | 1.0   | 1.0  | 1.0  | 1.0   |
| 1hjq | 8 | 1.0  | 0.75 | 0.83  | 1.0  | 0.75 | 0.83  |
| 3edp | 8 | 0.83 | 0.83 | 0.79  | 1.0  | 1.0  | 1.0   |
| 3dep | 8 | 0.83 | 1.0  | 0.89  | 1.0  | 1.0  | 1.0   |
| 3cjp | 8 | 0.83 | 0.71 | 0.71  | 0.83 | 0.71 | 0.7   |

|      |   |      |      |      |      |      |      |
|------|---|------|------|------|------|------|------|
| 3c70 | 8 | 0.83 | 0.83 | 0.79 | 0.83 | 0.83 | 0.79 |
| 3brn | 8 | 0.83 | 0.62 | 0.63 | 0.83 | 0.62 | 0.63 |
| 2rgq | 8 | 0.83 | 0.71 | 0.71 | 0.83 | 0.71 | 0.71 |
| 2r3e | 8 | 0.83 | 0.71 | 0.7  | 0.83 | 0.71 | 0.7  |
| 2qid | 8 | 0.83 | 1.0  | 0.89 | 0.83 | 1.0  | 0.89 |
| 2jw1 | 8 | 0.83 | 0.71 | 0.7  | 0.83 | 0.71 | 0.7  |
| 2jp2 | 8 | 0.83 | 0.71 | 0.7  | 0.83 | 0.71 | 0.7  |
| 2hq7 | 8 | 0.83 | 0.83 | 0.79 | 1.0  | 1.0  | 1.0  |
| 2f01 | 8 | 0.83 | 0.62 | 0.63 | 0.83 | 0.62 | 0.63 |
| 2esr | 8 | 0.83 | 0.71 | 0.71 | 0.83 | 0.71 | 0.7  |
| 2cm9 | 8 | 0.83 | 0.62 | 0.63 | 1.0  | 1.0  | 1.0  |
| 2ciu | 8 | 0.83 | 0.83 | 0.79 | 1.0  | 1.0  | 1.0  |
| 2bt9 | 8 | 0.83 | 0.83 | 0.79 | 0.83 | 0.83 | 0.79 |
| 2axw | 8 | 0.83 | 0.62 | 0.63 | 0.83 | 0.62 | 0.63 |
| 1wfj | 8 | 0.83 | 0.71 | 0.7  | 0.83 | 0.71 | 0.7  |
| 1vkk | 8 | 0.83 | 0.83 | 0.79 | 1.0  | 1.0  | 1.0  |
| 1pb0 | 8 | 0.83 | 0.71 | 0.71 | 0.83 | 0.71 | 0.71 |
| 1p4l | 8 | 0.83 | 0.83 | 0.79 | 0.83 | 0.83 | 0.79 |
| 1n55 | 8 | 0.83 | 0.62 | 0.64 | 0.83 | 0.62 | 0.64 |
| 1mm5 | 8 | 0.83 | 0.62 | 0.63 | 0.83 | 0.62 | 0.63 |
| 1l8j | 8 | 0.83 | 0.71 | 0.7  | 1.0  | 1.0  | 1.0  |
| 1g90 | 8 | 0.83 | 0.62 | 0.63 | 1.0  | 0.75 | 0.83 |
| 1duj | 8 | 0.83 | 0.83 | 0.79 | 0.83 | 0.83 | 0.79 |
| 1whk | 8 | 0.8  | 0.67 | 0.67 | 0.8  | 0.67 | 0.67 |
| 1pp0 | 8 | 0.8  | 0.67 | 0.67 | 0.83 | 0.83 | 0.79 |
| 3duw | 8 | 0.67 | 0.57 | 0.51 | 0.67 | 0.57 | 0.5  |



|      |   |      |      |      |      |      |      |
|------|---|------|------|------|------|------|------|
| 3d1m | 8 | 0.67 | 0.67 | 0.58 | 0.67 | 0.67 | 0.58 |
| 3c8i | 8 | 0.67 | 0.67 | 0.58 | 0.83 | 0.83 | 0.79 |
| 3ba3 | 8 | 0.67 | 0.57 | 0.5  | 0.67 | 0.57 | 0.5  |
| 2yw4 | 8 | 0.67 | 0.57 | 0.51 | 0.67 | 0.57 | 0.51 |
| 2vuv | 8 | 0.67 | 0.67 | 0.58 | 0.67 | 0.67 | 0.58 |
| 2vpt | 8 | 0.67 | 0.67 | 0.58 | 0.67 | 0.67 | 0.58 |
| 2vne | 8 | 0.67 | 0.57 | 0.5  | 0.83 | 0.71 | 0.7  |
| 2vf2 | 8 | 0.67 | 0.57 | 0.51 | 0.67 | 0.57 | 0.5  |
| 2v36 | 8 | 0.67 | 0.8  | 0.67 | 0.67 | 0.8  | 0.67 |
| 2rk9 | 8 | 0.67 | 0.57 | 0.5  | 0.83 | 0.71 | 0.7  |
| 2rb8 | 8 | 0.67 | 0.67 | 0.58 | 0.67 | 0.67 | 0.58 |
| 2r6u | 8 | 0.67 | 0.57 | 0.5  | 0.67 | 0.57 | 0.5  |
| 2qyz | 8 | 0.67 | 0.67 | 0.58 | 0.83 | 0.83 | 0.79 |
| 2qnt | 8 | 0.67 | 0.67 | 0.58 | 0.67 | 0.67 | 0.58 |
| 2ou4 | 8 | 0.67 | 0.5  | 0.45 | 0.67 | 0.5  | 0.45 |
| 2oq8 | 8 | 0.67 | 0.57 | 0.5  | 0.67 | 0.57 | 0.5  |
| 2isv | 8 | 0.67 | 0.5  | 0.45 | 0.67 | 0.5  | 0.45 |
| 2iml | 8 | 0.67 | 0.57 | 0.5  | 0.83 | 0.71 | 0.7  |
| 2gm2 | 8 | 0.67 | 0.67 | 0.58 | 0.83 | 0.83 | 0.79 |
| 2glu | 8 | 0.67 | 0.57 | 0.5  | 0.67 | 0.57 | 0.5  |
| 2fk9 | 8 | 0.67 | 0.67 | 0.58 | 0.83 | 0.83 | 0.79 |
| 2fck | 8 | 0.67 | 0.57 | 0.51 | 0.67 | 0.57 | 0.5  |
| 2f6x | 8 | 0.67 | 0.5  | 0.45 | 0.67 | 0.5  | 0.45 |
| 2e3v | 8 | 0.67 | 0.67 | 0.58 | 0.83 | 0.83 | 0.79 |
| 2c8j | 8 | 0.67 | 0.67 | 0.58 | 0.83 | 0.83 | 0.79 |
| 2bhh | 8 | 0.67 | 0.67 | 0.58 | 0.83 | 0.83 | 0.79 |

|      |   |      |      |      |      |      |      |
|------|---|------|------|------|------|------|------|
| 2ayt | 8 | 0.67 | 0.57 | 0.5  | 0.83 | 0.71 | 0.7  |
| 1wmy | 8 | 0.67 | 0.57 | 0.5  | 0.67 | 0.57 | 0.5  |
| 1wfu | 8 | 0.67 | 0.67 | 0.58 | 0.67 | 0.67 | 0.58 |
| 1vrr | 8 | 0.67 | 0.67 | 0.58 | 0.67 | 0.67 | 0.58 |
| 1vkw | 8 | 0.67 | 0.67 | 0.58 | 0.67 | 0.67 | 0.58 |
| 1ufo | 8 | 0.67 | 0.57 | 0.5  | 0.67 | 0.57 | 0.5  |
| 1ucd | 8 | 0.67 | 0.67 | 0.58 | 0.67 | 0.67 | 0.58 |
| 1u8s | 8 | 0.67 | 0.67 | 0.58 | 0.67 | 0.67 | 0.58 |
| 1tqj | 8 | 0.67 | 0.57 | 0.51 | 0.67 | 0.57 | 0.5  |
| 1sj5 | 8 | 0.67 | 0.57 | 0.51 | 0.83 | 0.71 | 0.7  |
| 1s20 | 8 | 0.67 | 0.67 | 0.58 | 0.67 | 0.67 | 0.58 |
| 1rz2 | 8 | 0.67 | 0.5  | 0.45 | 0.83 | 0.62 | 0.63 |
| 1rtt | 8 | 0.67 | 0.67 | 0.58 | 0.83 | 0.83 | 0.79 |
| 1r77 | 8 | 0.67 | 0.67 | 0.58 | 1.0  | 1.0  | 1.0  |
| 1ql0 | 8 | 0.67 | 0.67 | 0.58 | 1.0  | 1.0  | 1.0  |
| 1qdd | 8 | 0.67 | 0.57 | 0.5  | 1.0  | 0.86 | 0.9  |
| 1q0z | 8 | 0.67 | 0.57 | 0.51 | 0.67 | 0.57 | 0.5  |
| 1nki | 8 | 0.67 | 0.67 | 0.58 | 0.83 | 0.83 | 0.79 |
| 1mj5 | 8 | 0.67 | 0.57 | 0.5  | 0.67 | 0.57 | 0.5  |
| 1im3 | 8 | 0.67 | 0.67 | 0.58 | 1.0  | 1.0  | 1.0  |
| 1hlg | 8 | 0.67 | 0.57 | 0.51 | 0.67 | 0.57 | 0.5  |
| 1h56 | 8 | 0.67 | 0.8  | 0.67 | 0.67 | 0.8  | 0.67 |
| 1g5q | 8 | 0.67 | 0.67 | 0.58 | 0.67 | 0.67 | 0.58 |
| 1fro | 8 | 0.67 | 0.67 | 0.58 | 0.83 | 0.83 | 0.79 |
| 1ecs | 8 | 0.67 | 0.67 | 0.58 | 0.67 | 0.67 | 0.58 |
| 1dqz | 8 | 0.67 | 0.57 | 0.5  | 0.67 | 0.57 | 0.5  |

|      |   |      |      |      |      |      |      |
|------|---|------|------|------|------|------|------|
| 1ddw | 8 | 0.67 | 0.57 | 0.5  | 0.83 | 0.71 | 0.7  |
| 1914 | 8 | 0.67 | 0.57 | 0.5  | 0.83 | 0.71 | 0.7  |
| 1s40 | 8 | 0.6  | 0.5  | 0.44 | 0.83 | 0.83 | 0.79 |
| 3d6j | 8 | 0.5  | 0.5  | 0.38 | 0.5  | 0.5  | 0.37 |
| 3d1l | 8 | 0.5  | 0.5  | 0.37 | 0.67 | 0.67 | 0.58 |
| 3bii | 8 | 0.5  | 0.5  | 0.36 | 0.5  | 0.5  | 0.36 |
| 3bdw | 8 | 0.5  | 0.5  | 0.36 | 0.67 | 0.67 | 0.58 |
| 2z6w | 8 | 0.5  | 0.43 | 0.31 | 0.67 | 0.57 | 0.5  |
| 2z2s | 8 | 0.5  | 0.5  | 0.36 | 0.83 | 0.83 | 0.79 |
| 2vg4 | 8 | 0.5  | 0.5  | 0.37 | 0.6  | 0.5  | 0.44 |
| 2sns | 8 | 0.5  | 0.6  | 0.44 | 0.67 | 0.8  | 0.67 |
| 2rla | 8 | 0.5  | 0.43 | 0.31 | 0.5  | 0.43 | 0.3  |
| 2qru | 8 | 0.5  | 0.43 | 0.31 | 0.67 | 0.57 | 0.51 |
| 2qmo | 8 | 0.5  | 0.5  | 0.37 | 0.5  | 0.5  | 0.37 |
| 2q5c | 8 | 0.5  | 0.5  | 0.38 | 0.5  | 0.5  | 0.37 |
| 2q04 | 8 | 0.5  | 0.43 | 0.32 | 0.67 | 0.57 | 0.51 |
| 2pcs | 8 | 0.5  | 0.43 | 0.3  | 0.67 | 0.57 | 0.5  |
| 2nv4 | 8 | 0.5  | 0.43 | 0.31 | 0.5  | 0.43 | 0.3  |
| 2jwy | 8 | 0.5  | 0.5  | 0.36 | 0.67 | 0.67 | 0.58 |
| 2hth | 8 | 0.5  | 0.43 | 0.31 | 0.67 | 0.57 | 0.51 |
| 2fbv | 8 | 0.5  | 0.5  | 0.37 | 0.83 | 0.83 | 0.79 |
| 2dwx | 8 | 0.5  | 0.5  | 0.36 | 0.67 | 0.67 | 0.58 |
| 2cov | 8 | 0.5  | 0.5  | 0.36 | 0.67 | 0.67 | 0.58 |
| 2chh | 8 | 0.5  | 0.43 | 0.3  | 0.67 | 0.57 | 0.5  |
| 2bwq | 8 | 0.5  | 0.5  | 0.36 | 0.67 | 0.67 | 0.58 |
| 2aca | 8 | 0.5  | 0.43 | 0.3  | 0.5  | 0.43 | 0.3  |

|      |   |     |      |      |      |      |      |
|------|---|-----|------|------|------|------|------|
| 1zhv | 8 | 0.5 | 0.43 | 0.3  | 0.5  | 0.43 | 0.3  |
| 1z6h | 8 | 0.5 | 0.5  | 0.36 | 0.5  | 0.5  | 0.36 |
| 1z0n | 8 | 0.5 | 0.5  | 0.36 | 0.67 | 0.67 | 0.58 |
| 1y12 | 8 | 0.5 | 0.43 | 0.3  | 0.83 | 0.71 | 0.7  |
| 1xvl | 8 | 0.5 | 0.6  | 0.44 | 0.67 | 0.8  | 0.67 |
| 1xq4 | 8 | 0.5 | 0.5  | 0.36 | 0.67 | 0.67 | 0.58 |
| 1xm0 | 8 | 0.5 | 0.6  | 0.44 | 0.67 | 0.8  | 0.67 |
| 1x5x | 8 | 0.5 | 0.5  | 0.36 | 0.67 | 0.67 | 0.58 |
| 1vyn | 8 | 0.5 | 0.5  | 0.36 | 0.83 | 0.83 | 0.79 |
| 1vrl | 8 | 0.5 | 0.5  | 0.36 | 0.5  | 0.5  | 0.36 |
| 1vhh | 8 | 0.5 | 0.5  | 0.36 | 0.67 | 0.67 | 0.58 |
| 1uow | 8 | 0.5 | 0.5  | 0.36 | 0.67 | 0.67 | 0.58 |
| 1u83 | 8 | 0.5 | 0.43 | 0.32 | 0.67 | 0.57 | 0.51 |
| 1u69 | 8 | 0.5 | 0.5  | 0.36 | 0.5  | 0.5  | 0.36 |
| 1tvq | 8 | 0.5 | 0.43 | 0.3  | 0.67 | 0.57 | 0.5  |
| 1q3t | 8 | 0.5 | 0.5  | 0.36 | 0.5  | 0.5  | 0.37 |
| 1q2y | 8 | 0.5 | 0.43 | 0.32 | 0.67 | 0.57 | 0.51 |
| 1osy | 8 | 0.5 | 0.5  | 0.36 | 0.83 | 0.83 | 0.79 |
| 1on4 | 8 | 0.5 | 0.5  | 0.37 | 0.83 | 0.83 | 0.79 |
| 1lg7 | 8 | 0.5 | 0.5  | 0.36 | 0.67 | 0.67 | 0.58 |
| 1jc5 | 8 | 0.5 | 0.43 | 0.31 | 0.67 | 0.57 | 0.5  |
| 1i4w | 8 | 0.5 | 0.43 | 0.31 | 0.67 | 0.57 | 0.51 |
| 1i4v | 8 | 0.5 | 0.6  | 0.44 | 0.5  | 0.6  | 0.44 |
| 1fm5 | 8 | 0.5 | 0.43 | 0.31 | 0.67 | 0.57 | 0.5  |
| 1f9y | 8 | 0.5 | 0.5  | 0.37 | 0.5  | 0.5  | 0.37 |
| 1cl3 | 8 | 0.5 | 0.5  | 0.37 | 0.67 | 0.67 | 0.58 |

|      |   |      |      |       |      |      |      |
|------|---|------|------|-------|------|------|------|
| 1cjk | 8 | 0.5  | 0.43 | 0.3   | 0.5  | 0.43 | 0.3  |
| 1bow | 8 | 0.5  | 0.43 | 0.3   | 0.67 | 0.57 | 0.5  |
| 1b98 | 8 | 0.5  | 0.6  | 0.44  | 0.83 | 0.71 | 0.7  |
| 1avq | 8 | 0.5  | 0.5  | 0.36  | 0.5  | 0.5  | 0.36 |
| 3dn7 | 8 | 0.33 | 0.33 | 0.15  | 0.33 | 0.33 | 0.15 |
| 3bfq | 8 | 0.33 | 0.33 | 0.15  | 0.33 | 0.33 | 0.15 |
| 2vsd | 8 | 0.33 | 0.33 | 0.15  | 0.67 | 0.67 | 0.58 |
| 2v72 | 8 | 0.33 | 0.33 | 0.15  | 0.5  | 0.5  | 0.36 |
| 2v33 | 8 | 0.33 | 0.33 | 0.15  | 0.5  | 0.5  | 0.36 |
| 2tps | 8 | 0.33 | 0.25 | 0.092 | 0.5  | 0.38 | 0.26 |
| 2r8e | 8 | 0.33 | 0.33 | 0.17  | 0.5  | 0.5  | 0.38 |
| 2qaz | 8 | 0.33 | 0.33 | 0.16  | 0.5  | 0.5  | 0.36 |
| 2p7o | 8 | 0.33 | 0.33 | 0.15  | 0.5  | 0.5  | 0.36 |
| 2nnf | 8 | 0.33 | 0.33 | 0.15  | 0.33 | 0.33 | 0.15 |
| 2c2i | 8 | 0.33 | 0.33 | 0.15  | 0.33 | 0.33 | 0.15 |
| 1y7x | 8 | 0.33 | 0.4  | 0.21  | 0.33 | 0.4  | 0.21 |
| 1xbd | 8 | 0.33 | 0.33 | 0.15  | 0.5  | 0.5  | 0.36 |
| 1wb4 | 8 | 0.33 | 0.29 | 0.12  | 0.33 | 0.29 | 0.11 |
| 1vi3 | 8 | 0.33 | 0.33 | 0.15  | 0.5  | 0.5  | 0.36 |
| 1vgg | 8 | 0.33 | 0.33 | 0.15  | 0.33 | 0.33 | 0.15 |
| 1u7e | 8 | 0.33 | 0.33 | 0.15  | 0.5  | 0.5  | 0.36 |
| 1tvj | 8 | 0.33 | 0.29 | 0.1   | 0.67 | 0.67 | 0.58 |
| 1tlj | 8 | 0.33 | 0.33 | 0.15  | 0.5  | 0.5  | 0.36 |
| 1ro7 | 8 | 0.33 | 0.33 | 0.16  | 0.5  | 0.5  | 0.37 |
| 1rkj | 8 | 0.33 | 0.33 | 0.15  | 0.5  | 0.5  | 0.36 |
| 1oh0 | 8 | 0.33 | 0.29 | 0.1   | 0.5  | 0.43 | 0.3  |

|      |   |      |      |      |      |      |      |
|------|---|------|------|------|------|------|------|
| 1m4l | 8 | 0.33 | 0.29 | 0.11 | 0.67 | 0.57 | 0.5  |
| 1ls1 | 8 | 0.33 | 0.29 | 0.11 | 0.5  | 0.43 | 0.3  |
| 1g2l | 8 | 0.33 | 0.29 | 0.11 | 0.33 | 0.29 | 0.11 |
| 1adw | 8 | 0.33 | 0.33 | 0.16 | 0.5  | 0.5  | 0.36 |
| 1a6x | 8 | 0.33 | 0.33 | 0.15 | 0.5  | 0.5  | 0.36 |
| 2ret | 9 | 1.0  | 1.0  | 1.0  | 1.0  | 1.0  | 1.0  |
| 2bo9 | 9 | 1.0  | 1.0  | 1.0  | 1.0  | 1.0  | 1.0  |
| 1vju | 9 | 1.0  | 1.0  | 1.0  | 1.0  | 0.86 | 0.91 |
| 2v3g | 9 | 0.86 | 0.75 | 0.75 | 0.86 | 0.75 | 0.75 |
| 2p0y | 9 | 0.86 | 0.86 | 0.82 | 0.86 | 0.86 | 0.82 |
| 2ovi | 9 | 0.86 | 0.86 | 0.82 | 1.0  | 1.0  | 1.0  |
| 2nn5 | 9 | 0.86 | 0.86 | 0.82 | 1.0  | 1.0  | 1.0  |
| 2jkg | 9 | 0.86 | 0.86 | 0.82 | 0.86 | 0.86 | 0.82 |
| 1wk0 | 9 | 0.86 | 1.0  | 0.91 | 0.86 | 1.0  | 0.91 |
| 1wlh | 9 | 0.86 | 0.75 | 0.75 | 1.0  | 0.88 | 0.92 |
| 1kt6 | 9 | 0.86 | 0.67 | 0.69 | 1.0  | 0.78 | 0.85 |
| 1jzu | 9 | 0.86 | 0.67 | 0.69 | 1.0  | 1.0  | 1.0  |
| 1ilw | 9 | 0.86 | 0.67 | 0.69 | 0.86 | 0.67 | 0.69 |
| 1epb | 9 | 0.86 | 0.67 | 0.69 | 0.86 | 0.67 | 0.69 |
| 1njh | 9 | 0.83 | 0.83 | 0.8  | 1.0  | 1.0  | 1.0  |
| 3e5d | 9 | 0.71 | 0.71 | 0.65 | 0.71 | 0.71 | 0.65 |
| 3d8l | 9 | 0.71 | 0.71 | 0.65 | 0.71 | 0.71 | 0.65 |
| 3cyg | 9 | 0.71 | 0.71 | 0.65 | 0.83 | 0.71 | 0.72 |
| 3by9 | 9 | 0.71 | 0.71 | 0.65 | 0.71 | 0.71 | 0.65 |
| 3bhy | 9 | 0.71 | 0.83 | 0.72 | 0.86 | 0.86 | 0.82 |
| 3bgd | 9 | 0.71 | 0.62 | 0.58 | 0.86 | 0.75 | 0.75 |

|      |   |      |      |      |      |      |      |
|------|---|------|------|------|------|------|------|
| 2zex | 9 | 0.71 | 0.62 | 0.58 | 0.86 | 0.75 | 0.75 |
| 2z4d | 9 | 0.71 | 0.83 | 0.72 | 0.71 | 0.83 | 0.72 |
| 2vdu | 9 | 0.71 | 0.71 | 0.65 | 0.71 | 0.71 | 0.65 |
| 2r11 | 9 | 0.71 | 0.62 | 0.58 | 0.86 | 0.75 | 0.75 |
| 2qv8 | 9 | 0.71 | 0.71 | 0.65 | 0.86 | 0.86 | 0.82 |
| 2qol | 9 | 0.71 | 0.83 | 0.72 | 0.71 | 0.83 | 0.72 |
| 2q3w | 9 | 0.71 | 0.83 | 0.72 | 0.71 | 0.83 | 0.72 |
| 2q03 | 9 | 0.71 | 0.56 | 0.53 | 0.71 | 0.56 | 0.53 |
| 2otd | 9 | 0.71 | 0.62 | 0.58 | 0.71 | 0.62 | 0.58 |
| 2o6m | 9 | 0.71 | 1.0  | 0.82 | 0.71 | 1.0  | 0.82 |
| 2hj9 | 9 | 0.71 | 0.71 | 0.65 | 0.86 | 0.86 | 0.82 |
| 2hd9 | 9 | 0.71 | 0.71 | 0.65 | 0.86 | 0.86 | 0.82 |
| 2h1i | 9 | 0.71 | 0.71 | 0.65 | 0.71 | 0.71 | 0.65 |
| 2gkp | 9 | 0.71 | 0.71 | 0.65 | 0.71 | 0.71 | 0.65 |
| 2foo | 9 | 0.71 | 0.71 | 0.65 | 0.71 | 0.71 | 0.65 |
| 2fbl | 9 | 0.71 | 0.62 | 0.58 | 0.86 | 0.75 | 0.75 |
| 2ex4 | 9 | 0.71 | 0.71 | 0.65 | 0.71 | 0.71 | 0.65 |
| 2efy | 9 | 0.71 | 0.71 | 0.65 | 0.71 | 0.71 | 0.65 |
| 2e9h | 9 | 0.71 | 0.83 | 0.72 | 0.71 | 0.83 | 0.72 |
| 2cry | 9 | 0.71 | 0.71 | 0.65 | 0.71 | 0.71 | 0.65 |
| 2au7 | 9 | 0.71 | 0.62 | 0.58 | 0.71 | 0.62 | 0.58 |
| 1wdw | 9 | 0.71 | 0.62 | 0.58 | 0.71 | 0.62 | 0.58 |
| 1t9g | 9 | 0.71 | 0.83 | 0.72 | 0.71 | 0.83 | 0.72 |
| 1q3i | 9 | 0.71 | 0.62 | 0.58 | 0.86 | 0.75 | 0.75 |
| 1ngl | 9 | 0.71 | 0.56 | 0.53 | 0.86 | 0.67 | 0.69 |
| 1m40 | 9 | 0.71 | 0.83 | 0.72 | 0.71 | 0.83 | 0.72 |

|      |   |      |      |      |      |      |      |
|------|---|------|------|------|------|------|------|
| 1hcf | 9 | 0.71 | 0.71 | 0.65 | 0.71 | 0.71 | 0.65 |
| 1cl6 | 9 | 0.71 | 0.71 | 0.65 | 0.71 | 0.71 | 0.65 |
| 2dy0 | 9 | 0.67 | 0.67 | 0.6  | 0.71 | 0.83 | 0.72 |
| 1vae | 9 | 0.6  | 0.6  | 0.54 | 0.6  | 0.6  | 0.54 |
| 2rlq | 9 | 0.57 | 0.67 | 0.53 | 0.57 | 0.67 | 0.53 |
| 2rli | 9 | 0.57 | 0.57 | 0.47 | 0.71 | 0.71 | 0.65 |
| 2q2i | 9 | 0.57 | 0.67 | 0.53 | 0.71 | 0.83 | 0.72 |
| 2php | 9 | 0.57 | 0.67 | 0.53 | 0.71 | 0.83 | 0.72 |
| 2ofq | 9 | 0.57 | 0.57 | 0.47 | 0.57 | 0.57 | 0.47 |
| 2o6p | 9 | 0.57 | 0.5  | 0.41 | 0.71 | 0.62 | 0.58 |
| 2jsy | 9 | 0.57 | 0.67 | 0.54 | 0.57 | 0.67 | 0.54 |
| 2jqf | 9 | 0.57 | 0.57 | 0.47 | 0.71 | 0.71 | 0.65 |
| 2jnz | 9 | 0.57 | 0.57 | 0.47 | 0.57 | 0.57 | 0.47 |
| 2jeu | 9 | 0.57 | 0.57 | 0.47 | 1.0  | 0.71 | 0.82 |
| 2hzs | 9 | 0.57 | 0.44 | 0.37 | 0.71 | 0.56 | 0.53 |
| 2gov | 9 | 0.57 | 0.5  | 0.41 | 0.57 | 0.5  | 0.41 |
| 2fgs | 9 | 0.57 | 0.57 | 0.47 | 0.83 | 0.71 | 0.72 |
| 2cdm | 9 | 0.57 | 0.67 | 0.53 | 0.71 | 0.83 | 0.72 |
| 2c47 | 9 | 0.57 | 0.67 | 0.53 | 0.71 | 0.83 | 0.72 |
| 1zof | 9 | 0.57 | 0.57 | 0.47 | 0.67 | 0.57 | 0.54 |
| 1wc4 | 9 | 0.57 | 0.57 | 0.47 | 0.71 | 0.71 | 0.65 |
| 1vhw | 9 | 0.57 | 0.44 | 0.36 | 0.71 | 0.56 | 0.53 |
| 1r0b | 9 | 0.57 | 0.67 | 0.54 | 0.71 | 0.83 | 0.72 |
| 1qtw | 9 | 0.57 | 0.57 | 0.47 | 0.57 | 0.57 | 0.47 |
| 1mwp | 9 | 0.57 | 0.67 | 0.54 | 0.71 | 0.83 | 0.72 |
| 1kg0 | 9 | 0.57 | 0.67 | 0.53 | 0.67 | 0.67 | 0.6  |



|      |   |      |      |      |      |      |      |
|------|---|------|------|------|------|------|------|
| 1k5n | 9 | 0.57 | 0.57 | 0.47 | 0.57 | 0.57 | 0.47 |
| 1k3b | 9 | 0.57 | 0.4  | 0.33 | 0.86 | 0.6  | 0.64 |
| 1jsg | 9 | 0.57 | 0.44 | 0.36 | 0.86 | 0.67 | 0.69 |
| 1hfh | 9 | 0.57 | 0.67 | 0.53 | 0.57 | 0.67 | 0.53 |
| 1gci | 9 | 0.57 | 0.57 | 0.47 | 0.57 | 0.57 | 0.47 |
| 1fx4 | 9 | 0.57 | 0.57 | 0.47 | 0.71 | 0.71 | 0.65 |
| 1eso | 9 | 0.57 | 0.57 | 0.47 | 0.57 | 0.57 | 0.47 |
| 1cr4 | 9 | 0.57 | 0.5  | 0.41 | 0.71 | 0.62 | 0.58 |
| 1c4t | 9 | 0.57 | 0.57 | 0.47 | 0.71 | 0.71 | 0.65 |
| 1byl | 9 | 0.57 | 0.57 | 0.47 | 0.57 | 0.57 | 0.47 |
| 1ozv | 9 | 0.5  | 0.6  | 0.47 | 0.5  | 0.6  | 0.47 |
| 1gxy | 9 | 0.5  | 0.5  | 0.4  | 0.67 | 0.67 | 0.6  |
| 3d5n | 9 | 0.43 | 0.43 | 0.29 | 0.43 | 0.43 | 0.29 |
| 3bf7 | 9 | 0.43 | 0.43 | 0.3  | 0.5  | 0.43 | 0.35 |
| 3b9g | 9 | 0.43 | 0.38 | 0.25 | 0.57 | 0.5  | 0.42 |
| 2z0u | 9 | 0.43 | 0.43 | 0.29 | 0.57 | 0.57 | 0.47 |
| 2yrb | 9 | 0.43 | 0.43 | 0.29 | 0.43 | 0.43 | 0.29 |
| 2qvv | 9 | 0.43 | 0.43 | 0.3  | 0.43 | 0.43 | 0.3  |
| 2qh9 | 9 | 0.43 | 0.43 | 0.29 | 0.71 | 0.71 | 0.65 |
| 2q6m | 9 | 0.43 | 0.5  | 0.35 | 0.43 | 0.5  | 0.35 |
| 2puk | 9 | 0.43 | 0.5  | 0.35 | 0.83 | 0.83 | 0.8  |
| 2pof | 9 | 0.43 | 0.43 | 0.29 | 0.57 | 0.57 | 0.47 |
| 2pk9 | 9 | 0.43 | 0.5  | 0.35 | 0.67 | 0.67 | 0.6  |
| 2p2e | 9 | 0.43 | 0.43 | 0.29 | 0.43 | 0.43 | 0.29 |
| 2p1d | 9 | 0.43 | 0.43 | 0.29 | 0.57 | 0.57 | 0.47 |
| 2j9l | 9 | 0.43 | 0.5  | 0.35 | 0.57 | 0.67 | 0.54 |

|      |   |      |      |      |      |      |      |
|------|---|------|------|------|------|------|------|
| 2izv | 9 | 0.43 | 0.5  | 0.35 | 0.57 | 0.67 | 0.54 |
| 2isb | 9 | 0.43 | 0.38 | 0.26 | 0.57 | 0.5  | 0.42 |
| 2ia5 | 9 | 0.43 | 0.43 | 0.3  | 0.57 | 0.57 | 0.47 |
| 2gzq | 9 | 0.43 | 0.43 | 0.3  | 0.71 | 0.71 | 0.65 |
| 2gzo | 9 | 0.43 | 0.5  | 0.35 | 0.57 | 0.67 | 0.53 |
| 2gu9 | 9 | 0.43 | 0.43 | 0.29 | 0.43 | 0.43 | 0.29 |
| 2fsd | 9 | 0.43 | 0.38 | 0.25 | 0.57 | 0.5  | 0.42 |
| 2f7c | 9 | 0.43 | 0.38 | 0.24 | 0.43 | 0.38 | 0.24 |
| 2f3i | 9 | 0.43 | 0.38 | 0.24 | 0.57 | 0.5  | 0.41 |
| 2dvk | 9 | 0.43 | 0.43 | 0.29 | 0.57 | 0.57 | 0.47 |
| 2djm | 9 | 0.43 | 0.43 | 0.29 | 0.71 | 0.71 | 0.65 |
| 2d13 | 9 | 0.43 | 0.43 | 0.3  | 0.57 | 0.57 | 0.47 |
| 2cjt | 9 | 0.43 | 0.43 | 0.29 | 0.57 | 0.57 | 0.47 |
| 1ztp | 9 | 0.43 | 0.38 | 0.24 | 0.57 | 0.5  | 0.41 |
| 1yyc | 9 | 0.43 | 0.5  | 0.35 | 0.57 | 0.67 | 0.53 |
| 1ypq | 9 | 0.43 | 0.38 | 0.25 | 0.57 | 0.5  | 0.41 |
| 1y9q | 9 | 0.43 | 0.43 | 0.3  | 0.57 | 0.57 | 0.47 |
| 1y30 | 9 | 0.43 | 0.43 | 0.29 | 0.43 | 0.43 | 0.29 |
| 1xhu | 9 | 0.43 | 0.43 | 0.29 | 0.57 | 0.57 | 0.47 |
| 1wui | 9 | 0.43 | 0.5  | 0.35 | 0.5  | 0.5  | 0.4  |
| 1wfm | 9 | 0.43 | 0.43 | 0.29 | 0.57 | 0.57 | 0.47 |
| 1vsq | 9 | 0.43 | 0.43 | 0.29 | 0.43 | 0.43 | 0.29 |
| 1vh3 | 9 | 0.43 | 0.43 | 0.29 | 0.57 | 0.57 | 0.47 |
| 1v70 | 9 | 0.43 | 0.43 | 0.29 | 0.43 | 0.43 | 0.29 |
| 1t9z | 9 | 0.43 | 0.5  | 0.35 | 0.43 | 0.5  | 0.35 |
| 1n3j | 9 | 0.43 | 0.5  | 0.35 | 0.43 | 0.5  | 0.35 |

|      |    |      |      |       |      |      |       |
|------|----|------|------|-------|------|------|-------|
| 1mfm | 9  | 0.43 | 0.43 | 0.3   | 0.57 | 0.57 | 0.47  |
| 1l0a | 9  | 0.43 | 0.43 | 0.3   | 0.57 | 0.57 | 0.47  |
| 1k5j | 9  | 0.43 | 0.43 | 0.29  | 0.43 | 0.43 | 0.29  |
| 1edy | 9  | 0.43 | 0.43 | 0.29  | 0.43 | 0.43 | 0.29  |
| 1cvj | 9  | 0.43 | 0.5  | 0.35  | 0.5  | 0.5  | 0.4   |
| 1xdm | 9  | 0.33 | 0.29 | 0.18  | 0.33 | 0.29 | 0.17  |
| 2vpv | 9  | 0.29 | 0.29 | 0.11  | 0.43 | 0.43 | 0.29  |
| 2vp1 | 9  | 0.29 | 0.25 | 0.075 | 0.29 | 0.25 | 0.075 |
| 2q7o | 9  | 0.29 | 0.22 | 0.041 | 0.43 | 0.43 | 0.29  |
| 2p73 | 9  | 0.29 | 0.29 | 0.11  | 0.43 | 0.43 | 0.29  |
| 2jyb | 9  | 0.29 | 0.25 | 0.082 | 0.43 | 0.38 | 0.25  |
| 2dpl | 9  | 0.29 | 0.29 | 0.13  | 0.29 | 0.29 | 0.13  |
| 2b82 | 9  | 0.29 | 0.29 | 0.12  | 0.43 | 0.43 | 0.3   |
| 1z3r | 9  | 0.29 | 0.33 | 0.16  | 0.43 | 0.43 | 0.3   |
| 1r75 | 9  | 0.29 | 0.29 | 0.11  | 0.43 | 0.43 | 0.29  |
| 1qc9 | 9  | 0.29 | 0.33 | 0.17  | 0.43 | 0.5  | 0.35  |
| 1k7j | 9  | 0.29 | 0.29 | 0.11  | 0.43 | 0.43 | 0.29  |
| 2jzj | 10 | 1.0  | 1.0  | 1.0   | 1.0  | 1.0  | 1.0   |
| 1x8q | 10 | 1.0  | 0.8  | 0.87  | 1.0  | 0.8  | 0.87  |
| 1vay | 10 | 1.0  | 0.88 | 0.92  | 1.0  | 0.88 | 0.92  |
| 2q4n | 10 | 0.88 | 0.7  | 0.73  | 1.0  | 0.8  | 0.87  |
| 2hhi | 10 | 0.88 | 0.88 | 0.85  | 0.88 | 0.88 | 0.85  |
| 2g7b | 10 | 0.88 | 0.78 | 0.79  | 1.0  | 0.89 | 0.93  |
| 2anu | 10 | 0.88 | 0.78 | 0.78  | 0.88 | 0.78 | 0.78  |
| 1us0 | 10 | 0.88 | 0.88 | 0.85  | 0.88 | 0.88 | 0.85  |
| 1tnr | 10 | 0.86 | 1.0  | 0.91  | 0.86 | 1.0  | 0.91  |

|      |    |      |      |      |      |      |      |
|------|----|------|------|------|------|------|------|
| 1tba | 10 | 0.88 | 0.78 | 0.78 | 0.88 | 0.78 | 0.78 |
| 1rfv | 10 | 0.88 | 0.78 | 0.79 | 1.0  | 0.89 | 0.93 |
| 1mdc | 10 | 0.88 | 0.78 | 0.78 | 0.88 | 0.78 | 0.78 |
| 1jhs | 10 | 0.88 | 0.88 | 0.85 | 0.88 | 0.88 | 0.85 |
| 1ifc | 10 | 0.88 | 0.78 | 0.79 | 1.0  | 0.89 | 0.93 |
| 1gwe | 10 | 0.88 | 0.7  | 0.73 | 0.88 | 0.7  | 0.73 |
| 3bs1 | 10 | 0.86 | 0.86 | 0.83 | 0.86 | 0.86 | 0.83 |
| 2rdk | 10 | 0.86 | 1.0  | 0.91 | 0.86 | 1.0  | 0.91 |
| 2jzl | 10 | 0.86 | 1    | 0.91 | 0.86 | 1.0  | 0.91 |
| 3bp1 | 10 | 0.75 | 0.75 | 0.7  | 0.75 | 0.75 | 0.7  |
| 2h9a | 10 | 0.75 | 0.75 | 0.7  | 0.75 | 0.75 | 0.7  |
| 2g3r | 10 | 0.75 | 0.75 | 0.7  | 0.88 | 0.88 | 0.85 |
| 2cg7 | 10 | 0.75 | 1.0  | 0.84 | 0.75 | 1.0  | 0.84 |
| 2bkd | 10 | 0.75 | 0.75 | 0.7  | 0.75 | 0.75 | 0.7  |
| 2b7u | 10 | 0.75 | 0.86 | 0.76 | 0.88 | 0.86 | 0.82 |
| 1ydo | 10 | 0.75 | 0.67 | 0.64 | 0.75 | 0.67 | 0.64 |
| 1wv4 | 10 | 0.75 | 0.67 | 0.64 | 0.88 | 0.78 | 0.78 |
| 1lf7 | 10 | 0.75 | 0.6  | 0.59 | 0.88 | 0.7  | 0.73 |
| 1ag4 | 10 | 0.75 | 0.6  | 0.59 | 0.88 | 0.7  | 0.73 |
| 2a0m | 10 | 0.71 | 0.62 | 0.6  | 0.71 | 0.62 | 0.6  |
| 1obo | 10 | 0.71 | 0.62 | 0.6  | 0.71 | 0.62 | 0.6  |
| 7a3h | 10 | 0.62 | 0.56 | 0.5  | 0.62 | 0.56 | 0.5  |
| 3c0y | 10 | 0.62 | 0.62 | 0.55 | 0.75 | 0.86 | 0.76 |
| 3bwh | 10 | 0.62 | 0.71 | 0.6  | 0.75 | 0.86 | 0.76 |
| 2z5c | 10 | 0.62 | 0.62 | 0.54 | 0.62 | 0.62 | 0.54 |
| 2z5c | 10 | 0.62 | 0.62 | 0.54 | 0.62 | 0.62 | 0.54 |

|      |    |      |      |      |      |      |      |
|------|----|------|------|------|------|------|------|
| 2z5c | 10 | 0.62 | 0.62 | 0.54 | 0.62 | 0.62 | 0.54 |
| 1euw | 10 | 0.62 | 0.62 | 0.54 | 0.62 | 0.62 | 0.54 |
| 2ra6 | 10 | 0.62 | 0.56 | 0.49 | 0.62 | 0.56 | 0.49 |
| 2ovs | 10 | 0.62 | 0.5  | 0.45 | 0.62 | 0.5  | 0.45 |
| 2nwf | 10 | 0.62 | 0.71 | 0.6  | 0.75 | 0.86 | 0.76 |
| 2nrh | 10 | 0.62 | 0.62 | 0.55 | 0.62 | 0.62 | 0.55 |
| 2i3b | 10 | 0.62 | 0.56 | 0.49 | 0.62 | 0.56 | 0.49 |
| 2g8o | 10 | 0.62 | 0.71 | 0.61 | 0.75 | 0.86 | 0.76 |
| 2cwp | 10 | 0.62 | 0.71 | 0.6  | 0.71 | 0.71 | 0.66 |
| 1zhi | 10 | 0.62 | 0.56 | 0.5  | 0.62 | 0.56 | 0.5  |
| 1zcu | 10 | 0.62 | 0.5  | 0.46 | 0.75 | 0.6  | 0.59 |
| 1x3w | 10 | 0.62 | 0.71 | 0.6  | 0.62 | 0.71 | 0.6  |
| 1vqt | 10 | 0.62 | 0.56 | 0.5  | 0.71 | 0.56 | 0.56 |
| 1vli | 10 | 0.62 | 0.71 | 0.6  | 0.62 | 0.71 | 0.6  |
| 1v2b | 10 | 0.62 | 0.62 | 0.54 | 0.88 | 0.88 | 0.85 |
| 1t15 | 10 | 0.62 | 0.71 | 0.6  | 0.88 | 0.88 | 0.85 |
| 1rzn | 10 | 0.62 | 0.71 | 0.6  | 0.62 | 0.71 | 0.6  |
| 1rz0 | 10 | 0.62 | 0.71 | 0.6  | 0.62 | 0.71 | 0.6  |
| 1rg8 | 10 | 0.62 | 0.71 | 0.6  | 0.62 | 0.71 | 0.6  |
| 1qlw | 10 | 0.62 | 0.62 | 0.55 | 0.62 | 0.62 | 0.54 |
| 1p1x | 10 | 0.62 | 0.62 | 0.55 | 0.62 | 0.62 | 0.55 |
| 1m15 | 10 | 0.62 | 0.62 | 0.54 | 0.88 | 0.88 | 0.85 |
| 1jls | 10 | 0.62 | 0.62 | 0.54 | 0.62 | 0.62 | 0.54 |
| 1jd2 | 10 | 0.62 | 0.62 | 0.54 | 0.88 | 0.88 | 0.85 |
| 1ix5 | 10 | 0.62 | 0.83 | 0.67 | 0.62 | 0.83 | 0.67 |
| 1hux | 10 | 0.62 | 0.62 | 0.54 | 0.62 | 0.62 | 0.55 |

|      |    |      |      |      |      |      |      |
|------|----|------|------|------|------|------|------|
| 1dzk | 10 | 0.62 | 0.56 | 0.49 | 0.62 | 0.56 | 0.49 |
| 1dv9 | 10 | 0.62 | 0.56 | 0.49 | 0.62 | 0.56 | 0.49 |
| 2opl | 10 | 0.57 | 0.67 | 0.55 | 0.71 | 0.83 | 0.73 |
| 3djm | 10 | 0.5  | 0.57 | 0.44 | 0.5  | 0.57 | 0.44 |
| 3bb1 | 10 | 0.5  | 0.57 | 0.44 | 0.71 | 0.71 | 0.66 |
| 2z64 | 10 | 0.5  | 0.5  | 0.39 | 0.5  | 0.5  | 0.39 |
| 2r5o | 10 | 0.5  | 0.5  | 0.39 | 0.5  | 0.5  | 0.39 |
| 2qfd | 10 | 0.5  | 0.57 | 0.44 | 0.75 | 0.86 | 0.76 |
| 2ite | 10 | 0.5  | 0.5  | 0.39 | 0.62 | 0.62 | 0.54 |
| 2idc | 10 | 0.5  | 0.5  | 0.39 | 0.62 | 0.62 | 0.54 |
| 2fj8 | 10 | 0.5  | 0.67 | 0.5  | 0.62 | 0.83 | 0.67 |
| 2e7d | 10 | 0.5  | 0.5  | 0.39 | 0.88 | 0.88 | 0.85 |
| 2dkt | 10 | 0.5  | 0.67 | 0.5  | 0.57 | 0.67 | 0.55 |
| 2ckk | 10 | 0.5  | 0.5  | 0.39 | 0.62 | 0.62 | 0.54 |
| 2b06 | 10 | 0.5  | 0.5  | 0.39 | 0.5  | 0.5  | 0.39 |
| 1vch | 10 | 0.5  | 0.57 | 0.45 | 0.5  | 0.57 | 0.44 |
| 1r8y | 10 | 0.5  | 0.5  | 0.39 | 0.62 | 0.62 | 0.54 |
| 1dqn | 10 | 0.5  | 0.5  | 0.39 | 0.62 | 0.62 | 0.54 |
| 1qfe | 10 | 0.5  | 0.5  | 0.4  | 0.5  | 0.5  | 0.4  |
| 1ofq | 10 | 0.5  | 0.44 | 0.36 | 0.5  | 0.44 | 0.36 |
| 1o4t | 10 | 0.5  | 0.5  | 0.39 | 0.5  | 0.5  | 0.39 |
| 1ko6 | 10 | 0.5  | 0.57 | 0.44 | 0.62 | 0.62 | 0.54 |
| 1k3x | 10 | 0.5  | 0.57 | 0.44 | 0.5  | 0.57 | 0.44 |
| 1hdo | 10 | 0.5  | 0.5  | 0.39 | 0.5  | 0.5  | 0.39 |
| 1h9r | 10 | 0.5  | 0.5  | 0.39 | 0.5  | 0.5  | 0.39 |
| 1c28 | 10 | 0.5  | 0.5  | 0.39 | 0.62 | 0.62 | 0.54 |

|      |    |      |      |      |      |      |      |
|------|----|------|------|------|------|------|------|
| 1byi | 10 | 0.5  | 0.57 | 0.44 | 0.62 | 0.71 | 0.6  |
| 1bpr | 10 | 0.5  | 0.67 | 0.5  | 0.5  | 0.67 | 0.5  |
| 1qwo | 10 | 0.43 | 0.38 | 0.28 | 0.57 | 0.5  | 0.44 |
| 3cla | 10 | 0.38 | 0.38 | 0.24 | 0.5  | 0.5  | 0.39 |
| 2zke | 10 | 0.38 | 0.33 | 0.21 | 0.75 | 0.86 | 0.76 |
| 2zan | 10 | 0.38 | 0.43 | 0.28 | 0.38 | 0.43 | 0.28 |
| 2qbu | 10 | 0.38 | 0.38 | 0.24 | 0.38 | 0.38 | 0.24 |
| 2pqf | 10 | 0.38 | 0.38 | 0.24 | 0.5  | 0.5  | 0.39 |
| 2p86 | 10 | 0.38 | 0.43 | 0.28 | 0.62 | 0.62 | 0.54 |
| 2p0r | 10 | 0.38 | 0.43 | 0.28 | 0.5  | 0.57 | 0.44 |
| 2orw | 10 | 0.38 | 0.43 | 0.28 | 0.38 | 0.43 | 0.28 |
| 2hew | 10 | 0.38 | 0.38 | 0.24 | 0.5  | 0.5  | 0.39 |
| 2gml | 10 | 0.38 | 0.38 | 0.24 | 0.62 | 0.62 | 0.54 |
| 2enq | 10 | 0.38 | 0.38 | 0.24 | 0.5  | 0.5  | 0.39 |
| 2co7 | 10 | 0.38 | 0.38 | 0.24 | 0.38 | 0.38 | 0.24 |
| 2azw | 10 | 0.38 | 0.38 | 0.24 | 0.38 | 0.38 | 0.24 |
| 2arc | 10 | 0.38 | 0.38 | 0.24 | 0.62 | 0.62 | 0.54 |
| 1zuw | 10 | 0.38 | 0.38 | 0.24 | 0.5  | 0.5  | 0.39 |
| 1zkk | 10 | 0.38 | 0.5  | 0.33 | 0.38 | 0.5  | 0.33 |
| 1x5h | 10 | 0.38 | 0.43 | 0.28 | 0.5  | 0.57 | 0.44 |
| 1wyz | 10 | 0.38 | 0.43 | 0.28 | 0.38 | 0.43 | 0.28 |
| 1nhe | 10 | 0.38 | 0.38 | 0.24 | 0.38 | 0.38 | 0.24 |
| 1muw | 10 | 0.38 | 0.38 | 0.25 | 0.5  | 0.57 | 0.45 |
| 1ijg | 10 | 0.38 | 0.43 | 0.29 | 0.5  | 0.57 | 0.45 |
| 2qzq | 10 | 0.29 | 0.25 | 0.12 | 0.43 | 0.38 | 0.28 |
| 2izw | 10 | 0.29 | 0.25 | 0.12 | 0.38 | 0.38 | 0.24 |

|       |    |      |      |       |      |      |       |
|-------|----|------|------|-------|------|------|-------|
| 1rxt  | 10 | 0.29 | 0.29 | 0.16  | 0.29 | 0.29 | 0.16  |
| 1odf  | 10 | 0.29 | 0.29 | 0.16  | 0.43 | 0.43 | 0.33  |
| 3eqe  | 10 | 0.25 | 0.29 | 0.12  | 0.43 | 0.43 | 0.33  |
| 3cfu  | 10 | 0.25 | 0.29 | 0.13  | 0.38 | 0.43 | 0.29  |
| 2ozz  | 10 | 0.25 | 0.29 | 0.12  | 0.62 | 0.62 | 0.54  |
| 2j2z  | 10 | 0.25 | 0.33 | 0.16  | 0.5  | 0.67 | 0.5   |
| 2heu  | 10 | 0.25 | 0.29 | 0.12  | 0.38 | 0.43 | 0.28  |
| 2afj  | 10 | 0.25 | 0.29 | 0.12  | 0.38 | 0.43 | 0.28  |
| 1zrr  | 10 | 0.25 | 0.29 | 0.12  | 0.38 | 0.43 | 0.28  |
| 1utb  | 10 | 0.25 | 0.29 | 0.12  | 0.38 | 0.43 | 0.28  |
| 1tzip | 10 | 0.25 | 0.33 | 0.16  | 0.38 | 0.5  | 0.34  |
| 1o67  | 10 | 0.25 | 0.25 | 0.088 | 0.25 | 0.25 | 0.092 |
| 2zf4  | 11 | 0.89 | 0.8  | 0.81  | 0.89 | 0.8  | 0.81  |
| 2aco  | 11 | 0.89 | 0.8  | 0.81  | 1.0  | 0.9  | 0.94  |
| 1lsh  | 11 | 0.89 | 0.8  | 0.81  | 0.89 | 0.8  | 0.81  |
| 2vdf  | 11 | 0.88 | 0.64 | 0.7   | 0.88 | 0.64 | 0.7   |
| 2dxu  | 11 | 0.78 | 0.78 | 0.74  | 0.89 | 0.89 | 0.87  |
| 1xj5  | 11 | 0.78 | 0.78 | 0.73  | 0.89 | 0.89 | 0.87  |
| 1dfm  | 11 | 0.78 | 0.78 | 0.73  | 0.78 | 0.78 | 0.73  |
| 3dje  | 11 | 0.75 | 0.67 | 0.66  | 0.89 | 0.89 | 0.87  |
| 1niv  | 11 | 0.75 | 0.75 | 0.71  | 0.75 | 0.75 | 0.71  |
| 1gg3  | 11 | 0.75 | 0.75 | 0.71  | 0.88 | 0.88 | 0.85  |
| 1h32  | 11 | 0.71 | 0.83 | 0.74  | 0.83 | 0.83 | 0.81  |
| 2p0l  | 11 | 0.67 | 0.67 | 0.6   | 0.67 | 0.67 | 0.6   |
| 1ynm  | 11 | 0.67 | 0.67 | 0.6   | 0.78 | 0.78 | 0.73  |
| 1usc  | 11 | 0.67 | 0.75 | 0.65  | 0.67 | 0.75 | 0.65  |



|      |    |      |      |      |      |      |      |
|------|----|------|------|------|------|------|------|
| 1t5y | 11 | 0.67 | 0.67 | 0.6  | 0.78 | 0.78 | 0.73 |
| 1eys | 11 | 0.67 | 0.75 | 0.65 | 0.67 | 0.75 | 0.65 |
| 1ee9 | 11 | 0.67 | 0.67 | 0.6  | 0.67 | 0.67 | 0.6  |
| 1aur | 11 | 0.67 | 0.75 | 0.65 | 0.78 | 0.88 | 0.79 |
| 2rk3 | 11 | 0.62 | 0.62 | 0.56 | 0.62 | 0.62 | 0.56 |
| 3epp | 11 | 0.56 | 0.56 | 0.47 | 0.78 | 0.78 | 0.74 |
| 2znr | 11 | 0.56 | 0.56 | 0.47 | 0.78 | 0.78 | 0.74 |
| 2qsd | 11 | 0.56 | 0.62 | 0.51 | 0.56 | 0.62 | 0.51 |
| 2o3o | 11 | 0.56 | 0.56 | 0.47 | 0.67 | 0.67 | 0.6  |
| 2jg8 | 11 | 0.56 | 0.56 | 0.47 | 0.67 | 0.67 | 0.6  |
| 2jfr | 11 | 0.56 | 0.56 | 0.47 | 0.56 | 0.56 | 0.47 |
| 2imq | 11 | 0.56 | 0.56 | 0.47 | 0.67 | 0.67 | 0.6  |
| 1kmv | 11 | 0.56 | 0.56 | 0.47 | 0.67 | 0.67 | 0.6  |
| 2fuc | 11 | 0.56 | 0.56 | 0.47 | 0.62 | 0.56 | 0.52 |
| 2f9b | 11 | 0.56 | 0.71 | 0.57 | 0.56 | 0.71 | 0.57 |
| 2aj7 | 11 | 0.56 | 0.56 | 0.47 | 0.56 | 0.56 | 0.47 |
| 1ysl | 11 | 0.56 | 0.62 | 0.51 | 0.56 | 0.62 | 0.51 |
| 1xhh | 11 | 0.56 | 0.71 | 0.57 | 0.78 | 0.86 | 0.78 |
| 1wl8 | 11 | 0.56 | 0.56 | 0.47 | 0.78 | 0.78 | 0.73 |
| 1uzk | 11 | 0.56 | 0.83 | 0.63 | 0.62 | 0.83 | 0.68 |
| 1tp8 | 11 | 0.56 | 0.62 | 0.51 | 0.56 | 0.62 | 0.51 |
| 1t6y | 11 | 0.56 | 0.5  | 0.43 | 0.67 | 0.6  | 0.56 |
| 1t0v | 11 | 0.56 | 0.71 | 0.57 | 0.56 | 0.71 | 0.57 |
| 1sx8 | 11 | 0.56 | 0.62 | 0.51 | 0.56 | 0.62 | 0.51 |
| 1l6r | 11 | 0.56 | 0.56 | 0.47 | 0.67 | 0.67 | 0.6  |
| 1h1c | 11 | 0.56 | 0.56 | 0.47 | 0.56 | 0.56 | 0.47 |

|      |    |      |      |      |      |      |      |
|------|----|------|------|------|------|------|------|
| 1g55 | 11 | 0.56 | 0.56 | 0.47 | 0.56 | 0.56 | 0.47 |
| 1dct | 11 | 0.56 | 0.62 | 0.52 | 0.56 | 0.62 | 0.52 |
| 2uvq | 11 | 0.5  | 0.5  | 0.41 | 0.5  | 0.5  | 0.41 |
| 1noz | 11 | 0.5  | 0.5  | 0.42 | 0.5  | 0.5  | 0.42 |
| 3b93 | 11 | 0.44 | 0.44 | 0.34 | 0.44 | 0.44 | 0.34 |
| 2vrb | 11 | 0.44 | 0.5  | 0.38 | 0.56 | 0.62 | 0.51 |
| 2iee | 11 | 0.44 | 0.5  | 0.38 | 0.5  | 0.5  | 0.41 |
| 2bvb | 11 | 0.44 | 0.44 | 0.34 | 0.67 | 0.67 | 0.6  |
| 1y7m | 11 | 0.44 | 0.5  | 0.38 | 0.44 | 0.5  | 0.38 |
| 1xkj | 11 | 0.44 | 0.4  | 0.31 | 0.5  | 0.4  | 0.35 |
| 1w66 | 11 | 0.44 | 0.44 | 0.34 | 0.56 | 0.56 | 0.47 |
| 1qzt | 11 | 0.44 | 0.44 | 0.34 | 0.44 | 0.44 | 0.34 |
| 1qr0 | 11 | 0.44 | 0.57 | 0.42 | 0.5  | 0.57 | 0.46 |
| 1kqg | 11 | 0.44 | 0.57 | 0.42 | 0.56 | 0.71 | 0.57 |
| 3bcz | 11 | 0.38 | 0.33 | 0.24 | 0.38 | 0.33 | 0.24 |
| 1j3g | 11 | 0.38 | 0.43 | 0.31 | 0.38 | 0.43 | 0.31 |
| 1fsg | 11 | 0.38 | 0.33 | 0.24 | 0.38 | 0.33 | 0.24 |
| 1eb0 | 11 | 0.38 | 0.38 | 0.27 | 0.38 | 0.38 | 0.27 |
| 3ebr | 11 | 0.33 | 0.38 | 0.24 | 0.33 | 0.38 | 0.24 |
| 3dal | 11 | 0.33 | 0.38 | 0.24 | 0.33 | 0.38 | 0.24 |
| 3cne | 11 | 0.33 | 0.43 | 0.28 | 0.38 | 0.43 | 0.31 |
| 2ywi | 11 | 0.33 | 0.38 | 0.24 | 0.44 | 0.5  | 0.38 |
| 2uzf | 11 | 0.33 | 0.33 | 0.2  | 0.38 | 0.33 | 0.24 |
| 2o39 | 11 | 0.33 | 0.43 | 0.27 | 0.56 | 0.71 | 0.57 |
| 2i3c | 11 | 0.33 | 0.33 | 0.2  | 0.44 | 0.44 | 0.34 |
| 2g6t | 11 | 0.33 | 0.38 | 0.24 | 0.56 | 0.56 | 0.47 |

|      |    |      |      |       |      |      |       |
|------|----|------|------|-------|------|------|-------|
| 1znp | 11 | 0.33 | 0.33 | 0.2   | 0.33 | 0.33 | 0.2   |
| 1zn6 | 11 | 0.33 | 0.38 | 0.24  | 0.38 | 0.38 | 0.27  |
| 1yco | 11 | 0.33 | 0.33 | 0.2   | 0.33 | 0.33 | 0.2   |
| 1t4w | 11 | 0.33 | 0.33 | 0.2   | 0.44 | 0.44 | 0.34  |
| 1qu5 | 11 | 0.33 | 0.43 | 0.28  | 0.44 | 0.57 | 0.42  |
| 1m1n | 11 | 0.33 | 0.38 | 0.24  | 0.33 | 0.38 | 0.24  |
| 1k2n | 11 | 0.33 | 0.38 | 0.24  | 0.33 | 0.38 | 0.24  |
| 1h6q | 11 | 0.33 | 0.43 | 0.28  | 0.5  | 0.57 | 0.46  |
| 1gwm | 11 | 0.33 | 0.33 | 0.2   | 0.5  | 0.57 | 0.46  |
| 1w0n | 11 | 0.25 | 0.22 | 0.096 | 0.25 | 0.22 | 0.096 |
| 2o8q | 11 | 0.22 | 0.25 | 0.096 | 0.33 | 0.38 | 0.24  |
| 2mev | 11 | 0.22 | 0.25 | 0.096 | 0.33 | 0.38 | 0.24  |
| 1zoq | 11 | 0.22 | 0.22 | 0.076 | 0.33 | 0.33 | 0.21  |
| 1h6x | 11 | 0.22 | 0.22 | 0.07  | 0.56 | 0.56 | 0.47  |
| 2jep | 12 | 1.0  | 0.9  | 0.94  | 1.0  | 0.9  | 0.94  |
| 1eal | 12 | 0.9  | 0.9  | 0.88  | 0.9  | 0.9  | 0.88  |
| 3dha | 12 | 0.8  | 0.8  | 0.76  | 0.8  | 0.8  | 0.76  |
| 3cbt | 12 | 0.8  | 0.8  | 0.76  | 0.8  | 0.8  | 0.76  |
| 2r3u | 12 | 0.8  | 0.67 | 0.68  | 0.9  | 0.75 | 0.79  |
| 1nt2 | 12 | 0.8  | 0.8  | 0.76  | 0.89 | 0.8  | 0.82  |
| 3bb7 | 12 | 0.7  | 0.7  | 0.65  | 0.78 | 0.7  | 0.69  |
| 2vh1 | 12 | 0.7  | 0.7  | 0.65  | 0.7  | 0.7  | 0.65  |
| 2agk | 12 | 0.7  | 0.64 | 0.61  | 0.8  | 0.73 | 0.72  |
| 1iru | 12 | 0.7  | 0.78 | 0.69  | 0.8  | 0.89 | 0.82  |
| 2yzs | 12 | 0.67 | 0.75 | 0.66  | 0.67 | 0.75 | 0.66  |
| 2drz | 12 | 0.67 | 0.86 | 0.72  | 0.67 | 0.86 | 0.72  |

|      |    |      |      |      |      |      |      |
|------|----|------|------|------|------|------|------|
| 1wbc | 12 | 0.67 | 0.67 | 0.61 | 0.67 | 0.67 | 0.61 |
| 1knm | 12 | 0.67 | 0.86 | 0.72 | 0.67 | 0.86 | 0.72 |
| 1hcd | 12 | 0.67 | 0.86 | 0.72 | 0.67 | 0.86 | 0.72 |
| 1gvm | 12 | 0.67 | 1.0  | 0.8  | 0.67 | 1.0  | 0.8  |
| 1ft4 | 12 | 0.67 | 1.0  | 0.8  | 0.67 | 1.0  | 0.8  |
| 3bop | 12 | 0.6  | 0.55 | 0.49 | 0.6  | 0.55 | 0.49 |
| 2qf4 | 12 | 0.6  | 0.5  | 0.46 | 0.8  | 0.67 | 0.68 |
| 2ob3 | 12 | 0.6  | 0.75 | 0.62 | 0.6  | 0.75 | 0.62 |
| 2j5v | 12 | 0.6  | 0.6  | 0.53 | 0.7  | 0.7  | 0.65 |
| 2e1b | 12 | 0.6  | 0.67 | 0.57 | 0.7  | 0.78 | 0.69 |
| 2d5m | 12 | 0.6  | 0.67 | 0.57 | 0.6  | 0.67 | 0.57 |
| 1z8r | 12 | 0.6  | 0.75 | 0.62 | 0.6  | 0.75 | 0.62 |
| 1pv2 | 12 | 0.6  | 0.67 | 0.57 | 0.6  | 0.67 | 0.57 |
| 1juv | 12 | 0.6  | 0.6  | 0.53 | 0.6  | 0.6  | 0.53 |
| 1jss | 12 | 0.6  | 0.6  | 0.53 | 0.7  | 0.7  | 0.65 |
| 2v4m | 12 | 0.56 | 0.56 | 0.49 | 0.56 | 0.56 | 0.49 |
| 2ckq | 12 | 0.56 | 0.62 | 0.53 | 0.56 | 0.62 | 0.53 |
| 1vzi | 12 | 0.56 | 0.62 | 0.53 | 0.67 | 0.75 | 0.66 |
| 1r8n | 12 | 0.56 | 0.62 | 0.53 | 0.67 | 0.75 | 0.66 |
| 2nn8 | 12 | 0.5  | 0.5  | 0.41 | 0.6  | 0.6  | 0.53 |
| 2hy3 | 12 | 0.5  | 0.56 | 0.45 | 0.56 | 0.56 | 0.49 |
| 2fhh | 12 | 0.5  | 0.56 | 0.45 | 0.5  | 0.56 | 0.45 |
| 2c37 | 12 | 0.5  | 0.56 | 0.45 | 0.5  | 0.56 | 0.45 |
| 1z0w | 12 | 0.5  | 0.56 | 0.45 | 0.6  | 0.67 | 0.57 |
| 1xdq | 12 | 0.5  | 0.5  | 0.41 | 0.5  | 0.5  | 0.41 |
| 1ulc | 12 | 0.5  | 0.5  | 0.41 | 0.5  | 0.5  | 0.41 |

|      |    |      |      |      |      |      |      |
|------|----|------|------|------|------|------|------|
| 1qkq | 12 | 0.5  | 0.5  | 0.41 | 0.6  | 0.6  | 0.53 |
| 1is3 | 12 | 0.5  | 0.5  | 0.41 | 0.6  | 0.6  | 0.53 |
| 1em2 | 12 | 0.5  | 0.5  | 0.41 | 0.5  | 0.5  | 0.41 |
| 1b26 | 12 | 0.5  | 0.5  | 0.41 | 0.6  | 0.6  | 0.53 |
| 1r9g | 12 | 0.44 | 0.5  | 0.39 | 0.5  | 0.62 | 0.49 |
| 1l3k | 12 | 0.44 | 0.5  | 0.39 | 0.44 | 0.5  | 0.39 |
| 3c26 | 12 | 0.4  | 0.4  | 0.3  | 0.4  | 0.4  | 0.29 |
| 3b7k | 12 | 0.4  | 0.4  | 0.29 | 0.5  | 0.5  | 0.41 |
| 2j12 | 12 | 0.4  | 0.44 | 0.32 | 0.4  | 0.44 | 0.32 |
| 2fvy | 12 | 0.4  | 0.44 | 0.32 | 0.4  | 0.44 | 0.32 |
| 2a85 | 12 | 0.4  | 0.5  | 0.36 | 0.4  | 0.5  | 0.36 |
| 1pff | 12 | 0.4  | 0.4  | 0.3  | 0.4  | 0.4  | 0.3  |
| 1o3s | 12 | 0.4  | 0.44 | 0.33 | 0.5  | 0.56 | 0.45 |
| 1h03 | 12 | 0.4  | 0.5  | 0.36 | 0.4  | 0.5  | 0.36 |
| 1cr5 | 12 | 0.4  | 0.4  | 0.29 | 0.4  | 0.4  | 0.29 |
| 1bo1 | 12 | 0.4  | 0.4  | 0.3  | 0.6  | 0.6  | 0.53 |
| 2aeg | 12 | 0.33 | 0.3  | 0.2  | 0.44 | 0.4  | 0.32 |
| 8abp | 12 | 0.3  | 0.3  | 0.18 | 0.33 | 0.3  | 0.21 |
| 3clk | 12 | 0.3  | 0.3  | 0.18 | 0.4  | 0.4  | 0.3  |
| 2yuj | 12 | 0.3  | 0.3  | 0.17 | 0.4  | 0.4  | 0.29 |
| 2vha | 12 | 0.3  | 0.3  | 0.17 | 0.3  | 0.3  | 0.17 |
| 1vkj | 12 | 0.3  | 0.38 | 0.23 | 0.44 | 0.5  | 0.39 |
| 1uww | 12 | 0.3  | 0.38 | 0.23 | 0.4  | 0.5  | 0.36 |
| 1q9g | 12 | 0.3  | 0.33 | 0.2  | 0.4  | 0.44 | 0.33 |
| 1nmo | 12 | 0.3  | 0.3  | 0.18 | 0.4  | 0.4  | 0.3  |
| 1fcv | 12 | 0.3  | 0.43 | 0.27 | 0.33 | 0.43 | 0.29 |

|      |    |      |      |       |      |      |      |
|------|----|------|------|-------|------|------|------|
| 2pa7 | 12 | 0.22 | 0.22 | 0.099 | 0.33 | 0.33 | 0.23 |
| 2qlt | 12 | 0.2  | 0.22 | 0.083 | 0.3  | 0.33 | 0.21 |
| 3znb | 13 | 0.91 | 0.91 | 0.89  | 0.91 | 0.91 | 0.89 |
| 2z4h | 13 | 0.91 | 0.91 | 0.89  | 1.0  | 1.0  | 1.0  |
| 1iwn | 13 | 0.82 | 0.82 | 0.79  | 0.91 | 0.91 | 0.89 |
| 1d7b | 13 | 0.82 | 0.82 | 0.79  | 0.82 | 0.82 | 0.79 |
| 1yqs | 13 | 0.8  | 0.8  | 0.77  | 0.8  | 0.8  | 0.77 |
| 2asu | 13 | 0.73 | 0.62 | 0.61  | 0.82 | 0.69 | 0.71 |
| 1lc7 | 13 | 0.73 | 0.8  | 0.73  | 0.8  | 0.8  | 0.77 |
| 1fuj | 13 | 0.73 | 0.62 | 0.61  | 0.82 | 0.69 | 0.71 |
| 1xto | 13 | 0.7  | 0.64 | 0.62  | 0.8  | 0.73 | 0.73 |
| 2vhh | 13 | 0.64 | 0.7  | 0.62  | 0.73 | 0.8  | 0.73 |
| 2bsz | 13 | 0.64 | 0.64 | 0.58  | 0.64 | 0.64 | 0.58 |
| 2amp | 13 | 0.64 | 0.64 | 0.58  | 0.73 | 0.73 | 0.68 |
| 1tlt | 13 | 0.64 | 0.64 | 0.58  | 0.64 | 0.64 | 0.58 |
| 1im0 | 13 | 0.64 | 0.54 | 0.51  | 0.7  | 0.54 | 0.55 |
| 3c5p | 13 | 0.6  | 0.6  | 0.54  | 0.7  | 0.64 | 0.62 |
| 2vok | 13 | 0.6  | 0.55 | 0.51  | 0.7  | 0.64 | 0.62 |
| 2o5n | 13 | 0.6  | 0.6  | 0.54  | 0.7  | 0.7  | 0.66 |
| 1zwj | 13 | 0.6  | 0.55 | 0.51  | 0.6  | 0.55 | 0.51 |
| 1j0s | 13 | 0.6  | 0.67 | 0.58  | 0.6  | 0.67 | 0.58 |
| 1dt9 | 13 | 0.6  | 0.6  | 0.54  | 0.6  | 0.6  | 0.54 |
| 2uu7 | 13 | 0.55 | 0.55 | 0.47  | 0.64 | 0.64 | 0.58 |
| 2rbk | 13 | 0.55 | 0.6  | 0.51  | 0.55 | 0.6  | 0.51 |
| 2qck | 13 | 0.55 | 0.6  | 0.51  | 0.55 | 0.6  | 0.51 |
| 2pil | 13 | 0.55 | 0.55 | 0.47  | 0.55 | 0.55 | 0.47 |

|      |    |      |      |      |      |      |      |
|------|----|------|------|------|------|------|------|
| 2ezv | 13 | 0.55 | 0.67 | 0.55 | 0.55 | 0.67 | 0.55 |
| 2a7r | 13 | 0.55 | 0.55 | 0.47 | 0.55 | 0.55 | 0.47 |
| 1ug6 | 13 | 0.55 | 0.55 | 0.47 | 0.55 | 0.55 | 0.47 |
| 1t8i | 13 | 0.55 | 0.67 | 0.55 | 0.55 | 0.67 | 0.55 |
| 1nxm | 13 | 0.55 | 0.67 | 0.55 | 0.55 | 0.67 | 0.55 |
| 1nrx | 13 | 0.55 | 0.67 | 0.55 | 0.6  | 0.67 | 0.58 |
| 1ehi | 13 | 0.55 | 0.6  | 0.51 | 0.55 | 0.6  | 0.51 |
| 1e5u | 13 | 0.55 | 0.67 | 0.55 | 0.55 | 0.67 | 0.55 |
| 1uwc | 13 | 0.5  | 0.5  | 0.43 | 0.6  | 0.6  | 0.54 |
| 1d7p | 13 | 0.5  | 0.5  | 0.43 | 0.5  | 0.5  | 0.43 |
| 2ux8 | 13 | 0.45 | 0.45 | 0.36 | 0.45 | 0.45 | 0.36 |
| 2ok7 | 13 | 0.45 | 0.5  | 0.4  | 0.55 | 0.6  | 0.51 |
| 2j0u | 13 | 0.45 | 0.45 | 0.36 | 0.45 | 0.45 | 0.36 |
| 2e6g | 13 | 0.45 | 0.5  | 0.4  | 0.5  | 0.5  | 0.43 |
| 2aam | 13 | 0.45 | 0.56 | 0.43 | 0.45 | 0.56 | 0.43 |
| 1ty2 | 13 | 0.45 | 0.5  | 0.4  | 0.45 | 0.5  | 0.4  |
| 1lhv | 13 | 0.45 | 0.45 | 0.36 | 0.55 | 0.55 | 0.47 |
| 1hys | 13 | 0.45 | 0.56 | 0.43 | 0.5  | 0.56 | 0.46 |
| 1es3 | 13 | 0.45 | 0.62 | 0.47 | 0.45 | 0.62 | 0.47 |
| 7i1b | 13 | 0.4  | 0.44 | 0.34 | 0.45 | 0.56 | 0.43 |
| 1x82 | 13 | 0.4  | 0.44 | 0.34 | 0.45 | 0.56 | 0.43 |
| 1ro2 | 13 | 0.4  | 0.4  | 0.31 | 0.5  | 0.5  | 0.43 |
| 1ef7 | 13 | 0.4  | 0.4  | 0.31 | 0.4  | 0.4  | 0.31 |
| 1b04 | 13 | 0.4  | 0.44 | 0.34 | 0.45 | 0.56 | 0.43 |
| 1mr9 | 13 | 0.38 | 0.33 | 0.27 | 0.38 | 0.33 | 0.27 |
| 3seb | 13 | 0.36 | 0.44 | 0.31 | 0.36 | 0.44 | 0.32 |

|      |    |      |      |      |      |      |      |
|------|----|------|------|------|------|------|------|
| 2ic1 | 13 | 0.36 | 0.4  | 0.29 | 0.4  | 0.4  | 0.31 |
| 2c20 | 13 | 0.36 | 0.44 | 0.32 | 0.36 | 0.44 | 0.32 |
| 2a8i | 13 | 0.36 | 0.36 | 0.26 | 0.45 | 0.45 | 0.37 |
| 1uz0 | 13 | 0.36 | 0.44 | 0.31 | 0.36 | 0.44 | 0.31 |
| 1g88 | 13 | 0.36 | 0.36 | 0.26 | 0.55 | 0.55 | 0.47 |
| 2r2j | 13 | 0.3  | 0.33 | 0.22 | 0.3  | 0.33 | 0.22 |
| 2d3m | 13 | 0.3  | 0.3  | 0.2  | 0.4  | 0.4  | 0.31 |
| 2c0z | 13 | 0.3  | 0.3  | 0.2  | 0.3  | 0.3  | 0.2  |
| 1xe8 | 13 | 0.3  | 0.3  | 0.2  | 0.4  | 0.4  | 0.31 |
| 1n7g | 13 | 0.3  | 0.33 | 0.22 | 0.4  | 0.44 | 0.34 |
| 3ckh | 13 | 0.27 | 0.27 | 0.15 | 0.36 | 0.36 | 0.26 |
| 2o51 | 13 | 0.27 | 0.3  | 0.18 | 0.3  | 0.3  | 0.2  |
| 2cy7 | 13 | 0.27 | 0.3  | 0.18 | 0.36 | 0.4  | 0.29 |
| 1wck | 13 | 0.27 | 0.3  | 0.18 | 0.36 | 0.4  | 0.29 |
| 1odm | 13 | 0.27 | 0.27 | 0.16 | 0.36 | 0.36 | 0.26 |
| 2jxy | 14 | 0.91 | 1.0  | 0.95 | 0.91 | 1.0  | 0.95 |
| 1ww1 | 14 | 0.73 | 0.67 | 0.65 | 0.73 | 0.67 | 0.65 |
| 1poi | 14 | 0.73 | 0.73 | 0.69 | 0.73 | 0.73 | 0.69 |
| 1imd | 14 | 0.73 | 0.73 | 0.69 | 0.73 | 0.73 | 0.69 |
| 3b5u | 14 | 0.7  | 0.64 | 0.62 | 0.7  | 0.64 | 0.62 |
| 2hev | 14 | 0.7  | 1.0  | 0.82 | 0.7  | 1.0  | 0.82 |
| 1i78 | 14 | 0.7  | 0.47 | 0.51 | 0.82 | 0.6  | 0.65 |
| 2okt | 14 | 0.67 | 0.73 | 0.65 | 0.67 | 0.73 | 0.65 |
| 2ho5 | 14 | 0.67 | 0.67 | 0.62 | 0.67 | 0.67 | 0.62 |
| 2e2x | 14 | 0.67 | 0.73 | 0.65 | 0.75 | 0.82 | 0.75 |
| 1s31 | 14 | 0.67 | 0.62 | 0.58 | 0.83 | 0.77 | 0.77 |



|      |    |      |      |      |      |      |      |
|------|----|------|------|------|------|------|------|
| 1pq7 | 14 | 0.67 | 0.62 | 0.58 | 0.83 | 0.77 | 0.77 |
| 1o7j | 14 | 0.67 | 0.73 | 0.65 | 0.73 | 0.73 | 0.69 |
| 1kyf | 14 | 0.67 | 0.73 | 0.65 | 0.67 | 0.73 | 0.65 |
| 2yug | 14 | 0.64 | 0.78 | 0.67 | 0.64 | 0.78 | 0.67 |
| 1t2d | 14 | 0.64 | 0.7  | 0.62 | 0.64 | 0.7  | 0.62 |
| 1okg | 14 | 0.6  | 0.6  | 0.55 | 0.6  | 0.6  | 0.55 |
| 4mdh | 14 | 0.58 | 0.7  | 0.59 | 0.64 | 0.7  | 0.62 |
| 3efh | 14 | 0.58 | 0.64 | 0.55 | 0.64 | 0.64 | 0.59 |
| 2f1v | 14 | 0.58 | 0.54 | 0.49 | 0.67 | 0.62 | 0.58 |
| 2bt8 | 14 | 0.58 | 0.58 | 0.52 | 0.58 | 0.58 | 0.52 |
| 1y8q | 14 | 0.58 | 0.58 | 0.52 | 0.58 | 0.58 | 0.52 |
| 1vyr | 14 | 0.58 | 0.64 | 0.55 | 0.64 | 0.64 | 0.59 |
| 1qa7 | 14 | 0.58 | 0.58 | 0.52 | 0.58 | 0.58 | 0.52 |
| 3bdz | 14 | 0.55 | 0.67 | 0.55 | 0.55 | 0.67 | 0.55 |
| 2abs | 14 | 0.55 | 0.5  | 0.45 | 0.55 | 0.5  | 0.45 |
| 1w23 | 14 | 0.55 | 0.6  | 0.52 | 0.55 | 0.6  | 0.52 |
| 1vmo | 14 | 0.55 | 0.55 | 0.48 | 0.55 | 0.55 | 0.48 |
| 1fze | 14 | 0.55 | 0.55 | 0.48 | 0.6  | 0.55 | 0.52 |
| 3eaf | 14 | 0.5  | 0.5  | 0.42 | 0.5  | 0.5  | 0.43 |
| 3d02 | 14 | 0.5  | 0.55 | 0.46 | 0.55 | 0.55 | 0.49 |
| 2q6l | 14 | 0.5  | 0.5  | 0.42 | 0.58 | 0.58 | 0.52 |
| 1qop | 14 | 0.5  | 0.55 | 0.45 | 0.5  | 0.55 | 0.45 |
| 1qfc | 14 | 0.5  | 0.5  | 0.42 | 0.55 | 0.5  | 0.45 |
| 1oh4 | 14 | 0.5  | 0.5  | 0.42 | 0.58 | 0.58 | 0.52 |
| 1mzj | 14 | 0.5  | 0.6  | 0.49 | 0.67 | 0.8  | 0.69 |
| 1ka1 | 14 | 0.5  | 0.55 | 0.45 | 0.58 | 0.64 | 0.55 |

|      |    |      |      |      |      |      |      |
|------|----|------|------|------|------|------|------|
| 1f7v | 14 | 0.5  | 0.5  | 0.42 | 0.58 | 0.58 | 0.52 |
| 1iah | 14 | 0.5  | 0.55 | 0.45 | 0.5  | 0.55 | 0.45 |
| 1z70 | 14 | 0.45 | 0.56 | 0.44 | 0.5  | 0.56 | 0.47 |
| 1w97 | 14 | 0.45 | 0.5  | 0.41 | 0.45 | 0.5  | 0.41 |
| 1tjy | 14 | 0.45 | 0.45 | 0.38 | 0.45 | 0.45 | 0.38 |
| 1rut | 14 | 0.45 | 0.56 | 0.44 | 0.45 | 0.56 | 0.44 |
| 1pw5 | 14 | 0.45 | 0.56 | 0.44 | 0.5  | 0.56 | 0.47 |
| 2f5t | 14 | 0.42 | 0.38 | 0.31 | 0.42 | 0.38 | 0.31 |
| 2bp7 | 14 | 0.42 | 0.45 | 0.35 | 0.5  | 0.55 | 0.45 |
| 1zl0 | 14 | 0.42 | 0.42 | 0.33 | 0.42 | 0.42 | 0.33 |
| 1z2n | 14 | 0.42 | 0.45 | 0.35 | 0.42 | 0.45 | 0.35 |
| 1m4v | 14 | 0.42 | 0.45 | 0.35 | 0.5  | 0.55 | 0.45 |
| 1fjm | 14 | 0.42 | 0.45 | 0.35 | 0.45 | 0.45 | 0.38 |
| 1fg9 | 14 | 0.42 | 0.5  | 0.38 | 0.42 | 0.5  | 0.38 |
| 2gsh | 14 | 0.36 | 0.36 | 0.28 | 0.36 | 0.36 | 0.28 |
| 2r84 | 14 | 0.33 | 0.4  | 0.28 | 0.42 | 0.5  | 0.38 |
| 2nxv | 14 | 0.33 | 0.36 | 0.25 | 0.36 | 0.36 | 0.28 |
| 1t94 | 14 | 0.33 | 0.4  | 0.28 | 0.42 | 0.5  | 0.38 |
| 1hwh | 14 | 0.33 | 0.4  | 0.28 | 0.33 | 0.4  | 0.28 |
| 1h4a | 14 | 0.33 | 0.4  | 0.28 | 0.33 | 0.4  | 0.28 |
| 1g43 | 14 | 0.33 | 0.4  | 0.28 | 0.42 | 0.5  | 0.38 |
| 2q89 | 14 | 0.3  | 0.33 | 0.24 | 0.4  | 0.44 | 0.35 |
| 1pkh | 14 | 0.25 | 0.3  | 0.18 | 0.42 | 0.5  | 0.38 |
| 1lkx | 14 | 0.25 | 0.3  | 0.17 | 0.36 | 0.4  | 0.3  |
| 1i24 | 14 | 0.25 | 0.3  | 0.18 | 0.25 | 0.3  | 0.17 |
| 1pqz | 15 | 0.77 | 0.83 | 0.77 | 0.85 | 0.92 | 0.86 |

|      |    |      |      |      |      |      |      |
|------|----|------|------|------|------|------|------|
| 1llf | 15 | 0.75 | 0.75 | 0.72 | 0.75 | 0.75 | 0.72 |
| 3bsh | 15 | 0.69 | 0.69 | 0.65 | 0.75 | 0.69 | 0.68 |
| 1g6l | 15 | 0.67 | 0.8  | 0.7  | 0.67 | 0.8  | 0.7  |
| 2vvg | 15 | 0.62 | 0.67 | 0.59 | 0.62 | 0.67 | 0.59 |
| 2fdm | 15 | 0.62 | 0.57 | 0.53 | 0.62 | 0.57 | 0.53 |
| 2ddx | 15 | 0.6  | 0.46 | 0.47 | 0.64 | 0.54 | 0.53 |
| 3d2u | 15 | 0.58 | 0.58 | 0.53 | 0.67 | 0.67 | 0.62 |
| 1u2d | 15 | 0.58 | 0.58 | 0.53 | 0.67 | 0.67 | 0.62 |
| 1fl0 | 15 | 0.58 | 0.7  | 0.6  | 0.73 | 0.8  | 0.74 |
| 1cy0 | 15 | 0.58 | 0.58 | 0.53 | 0.58 | 0.58 | 0.53 |
| 3dlq | 15 | 0.54 | 0.64 | 0.53 | 0.54 | 0.64 | 0.53 |
| 3db2 | 15 | 0.54 | 0.54 | 0.47 | 0.54 | 0.54 | 0.47 |
| 2erj | 15 | 0.54 | 0.64 | 0.53 | 0.69 | 0.82 | 0.72 |
| 2eo5 | 15 | 0.54 | 0.58 | 0.5  | 0.58 | 0.58 | 0.53 |
| 2e48 | 15 | 0.54 | 0.54 | 0.47 | 0.54 | 0.54 | 0.47 |
| 2ci1 | 15 | 0.54 | 0.7  | 0.57 | 0.54 | 0.7  | 0.57 |
| 1zde | 15 | 0.54 | 0.7  | 0.57 | 0.54 | 0.7  | 0.57 |
| 1vdw | 15 | 0.54 | 0.58 | 0.5  | 0.62 | 0.67 | 0.59 |
| 1pb7 | 15 | 0.54 | 0.58 | 0.5  | 0.62 | 0.67 | 0.59 |
| 1nb8 | 15 | 0.54 | 0.58 | 0.5  | 0.58 | 0.58 | 0.53 |
| liar | 15 | 0.54 | 0.64 | 0.53 | 0.58 | 0.64 | 0.56 |
| 1ern | 15 | 0.54 | 0.64 | 0.53 | 0.62 | 0.73 | 0.63 |
| 2rir | 15 | 0.5  | 0.5  | 0.44 | 0.5  | 0.5  | 0.44 |
| 2an6 | 15 | 0.5  | 0.55 | 0.46 | 0.5  | 0.55 | 0.46 |
| 1r5y | 15 | 0.5  | 0.55 | 0.47 | 0.5  | 0.55 | 0.47 |
| 3cea | 15 | 0.46 | 0.5  | 0.41 | 0.46 | 0.5  | 0.41 |

|      |    |      |      |      |      |      |      |
|------|----|------|------|------|------|------|------|
| 2r16 | 15 | 0.46 | 0.46 | 0.39 | 0.5  | 0.46 | 0.41 |
| 2hqy | 15 | 0.46 | 0.46 | 0.39 | 0.46 | 0.46 | 0.39 |
| 2ba0 | 15 | 0.46 | 0.5  | 0.41 | 0.46 | 0.5  | 0.41 |
| 1un1 | 15 | 0.46 | 0.46 | 0.39 | 0.46 | 0.46 | 0.39 |
| 1gnh | 15 | 0.46 | 0.46 | 0.39 | 0.46 | 0.46 | 0.39 |
| 1at0 | 15 | 0.46 | 0.67 | 0.5  | 0.46 | 0.67 | 0.5  |
| 1mdz | 15 | 0.45 | 0.5  | 0.42 | 0.5  | 0.5  | 0.45 |
| 2z20 | 15 | 0.42 | 0.5  | 0.39 | 0.5  | 0.6  | 0.5  |
| 2epk | 15 | 0.42 | 0.45 | 0.37 | 0.5  | 0.55 | 0.46 |
| 2cnq | 15 | 0.42 | 0.45 | 0.37 | 0.42 | 0.45 | 0.37 |
| 1g5x | 15 | 0.42 | 0.42 | 0.34 | 0.42 | 0.42 | 0.34 |
| 2iw1 | 15 | 0.38 | 0.42 | 0.32 | 0.38 | 0.42 | 0.32 |
| 2a6z | 15 | 0.38 | 0.38 | 0.3  | 0.46 | 0.46 | 0.39 |
| 1n8b | 15 | 0.38 | 0.45 | 0.34 | 0.38 | 0.45 | 0.34 |
| 2qik | 15 | 0.31 | 0.36 | 0.25 | 0.38 | 0.45 | 0.34 |
| 1nkq | 15 | 0.31 | 0.33 | 0.23 | 0.31 | 0.33 | 0.23 |
| 1des | 15 | 0.31 | 0.33 | 0.23 | 0.38 | 0.42 | 0.32 |
| 2d7s | 15 | 0.23 | 0.3  | 0.17 | 0.23 | 0.3  | 0.17 |
| 3buu | 16 | 0.79 | 0.85 | 0.79 | 0.86 | 0.92 | 0.88 |
| 1jl0 | 16 | 0.75 | 0.64 | 0.66 | 0.75 | 0.64 | 0.66 |
| 1yln | 16 | 0.71 | 0.67 | 0.65 | 0.71 | 0.67 | 0.65 |
| 2ri2 | 16 | 0.69 | 0.69 | 0.65 | 0.69 | 0.69 | 0.65 |
| 3co8 | 16 | 0.64 | 0.75 | 0.66 | 0.69 | 0.75 | 0.69 |
| 1xmx | 16 | 0.64 | 0.69 | 0.63 | 0.69 | 0.69 | 0.66 |
| 2ffy | 16 | 0.57 | 0.67 | 0.57 | 0.64 | 0.75 | 0.66 |
| 1hl9 | 16 | 0.57 | 0.57 | 0.52 | 0.57 | 0.57 | 0.52 |

|      |    |      |      |      |      |      |      |
|------|----|------|------|------|------|------|------|
| 1hf2 | 16 | 0.54 | 0.54 | 0.48 | 0.62 | 0.62 | 0.57 |
| 2e6f | 16 | 0.5  | 0.5  | 0.45 | 0.5  | 0.5  | 0.45 |
| 1pfv | 16 | 0.5  | 0.64 | 0.51 | 0.5  | 0.64 | 0.51 |
| 1su8 | 16 | 0.46 | 0.5  | 0.42 | 0.46 | 0.5  | 0.42 |
| 2uu8 | 16 | 0.43 | 0.43 | 0.35 | 0.5  | 0.5  | 0.43 |
| 2nv9 | 16 | 0.43 | 0.4  | 0.34 | 0.46 | 0.4  | 0.36 |
| 2cws | 16 | 0.43 | 0.43 | 0.35 | 0.5  | 0.5  | 0.43 |
| 1vho | 16 | 0.43 | 0.46 | 0.37 | 0.46 | 0.46 | 0.4  |
| 1uwk | 16 | 0.43 | 0.46 | 0.38 | 0.43 | 0.46 | 0.38 |
| 1orh | 16 | 0.43 | 0.5  | 0.4  | 0.5  | 0.58 | 0.49 |
| 1jey | 16 | 0.43 | 0.46 | 0.38 | 0.43 | 0.46 | 0.38 |
| 1gv9 | 16 | 0.43 | 0.43 | 0.35 | 0.43 | 0.43 | 0.35 |
| 2ggc | 16 | 0.38 | 0.45 | 0.35 | 0.38 | 0.45 | 0.36 |
| 1pmh | 16 | 0.36 | 0.42 | 0.31 | 0.36 | 0.42 | 0.31 |
| 1ds1 | 16 | 0.31 | 0.33 | 0.24 | 0.31 | 0.33 | 0.24 |
| 2bhv | 16 | 0.29 | 0.33 | 0.23 | 0.29 | 0.33 | 0.23 |
| 2odi | 16 | 0.23 | 0.27 | 0.17 | 0.31 | 0.36 | 0.26 |
| 1k5n | 17 | 0.79 | 0.79 | 0.76 | 0.79 | 0.79 | 0.76 |
| 1itv | 17 | 0.79 | 0.85 | 0.8  | 0.79 | 0.85 | 0.8  |
| 2jdx | 17 | 0.71 | 0.91 | 0.79 | 0.71 | 0.91 | 0.79 |
| 1zt4 | 17 | 0.71 | 0.77 | 0.71 | 0.71 | 0.77 | 0.71 |
| 1p3e | 17 | 0.64 | 0.69 | 0.63 | 0.71 | 0.77 | 0.71 |
| 2yx1 | 17 | 0.6  | 0.69 | 0.6  | 0.6  | 0.69 | 0.6  |
| 2osx | 17 | 0.6  | 0.64 | 0.58 | 0.6  | 0.64 | 0.58 |
| 2ewo | 17 | 0.6  | 0.82 | 0.67 | 0.6  | 0.82 | 0.67 |
| 2eiy | 17 | 0.6  | 0.6  | 0.55 | 0.6  | 0.6  | 0.55 |

|      |    |      |      |      |      |      |      |
|------|----|------|------|------|------|------|------|
| 1nof | 17 | 0.6  | 0.56 | 0.53 | 0.6  | 0.56 | 0.53 |
| 2jhf | 17 | 0.57 | 0.57 | 0.52 | 0.57 | 0.57 | 0.52 |
| 2jgt | 17 | 0.54 | 0.54 | 0.49 | 0.62 | 0.62 | 0.58 |
| 2ehz | 17 | 0.53 | 0.53 | 0.48 | 0.6  | 0.6  | 0.55 |
| 1mpy | 17 | 0.53 | 0.53 | 0.48 | 0.53 | 0.53 | 0.48 |
| 2ozk | 17 | 0.5  | 0.64 | 0.52 | 0.5  | 0.64 | 0.52 |
| 1xtz | 17 | 0.5  | 0.54 | 0.47 | 0.64 | 0.69 | 0.63 |
| 2fa3 | 17 | 0.47 | 0.54 | 0.44 | 0.47 | 0.54 | 0.44 |
| 1ila | 17 | 0.47 | 0.54 | 0.44 | 0.47 | 0.54 | 0.44 |
| 2vhf | 17 | 0.43 | 0.46 | 0.38 | 0.5  | 0.54 | 0.47 |
| 1vld | 17 | 0.4  | 0.55 | 0.41 | 0.47 | 0.64 | 0.5  |
| 2dq3 | 17 | 0.38 | 0.42 | 0.34 | 0.46 | 0.5  | 0.43 |
| 1t5e | 17 | 0.33 | 0.36 | 0.27 | 0.33 | 0.36 | 0.27 |
| 2hh9 | 17 | 0.27 | 0.29 | 0.19 | 0.36 | 0.36 | 0.28 |
| 1ymf | 17 | 0.27 | 0.31 | 0.21 | 0.27 | 0.31 | 0.21 |
| 2gej | 18 | 0.73 | 0.79 | 0.73 | 0.73 | 0.79 | 0.73 |
| 1s7j | 18 | 0.62 | 0.62 | 0.58 | 0.62 | 0.62 | 0.58 |
| 2hez | 18 | 0.56 | 0.64 | 0.56 | 0.56 | 0.64 | 0.56 |
| 3e1k | 18 | 0.53 | 0.53 | 0.48 | 0.6  | 0.6  | 0.56 |
| 2hii | 18 | 0.53 | 0.53 | 0.48 | 0.53 | 0.53 | 0.48 |
| 1plr | 18 | 0.53 | 0.53 | 0.48 | 0.53 | 0.53 | 0.48 |
| 2nua | 18 | 0.5  | 0.62 | 0.51 | 0.5  | 0.62 | 0.51 |
| 2abr | 18 | 0.44 | 0.54 | 0.43 | 0.53 | 0.62 | 0.53 |
| 2g7k | 18 | 0.4  | 0.46 | 0.37 | 0.4  | 0.46 | 0.37 |
| 2uwy | 18 | 0.38 | 0.5  | 0.38 | 0.38 | 0.5  | 0.38 |
| 1ra0 | 18 | 0.38 | 0.43 | 0.34 | 0.38 | 0.43 | 0.34 |

|      |    |      |      |      |      |      |      |
|------|----|------|------|------|------|------|------|
| 1q6z | 18 | 0.38 | 0.4  | 0.32 | 0.44 | 0.47 | 0.39 |
| 1n4w | 18 | 0.38 | 0.43 | 0.34 | 0.38 | 0.43 | 0.34 |
| 1ga6 | 18 | 0.38 | 0.5  | 0.38 | 0.44 | 0.58 | 0.46 |
| 1t5r | 19 | 0.56 | 0.6  | 0.54 | 0.6  | 0.6  | 0.56 |
| 2ep7 | 19 | 0.53 | 0.56 | 0.5  | 0.59 | 0.62 | 0.56 |
| 2p0a | 19 | 0.5  | 0.57 | 0.49 | 0.56 | 0.64 | 0.56 |
| 1h79 | 19 | 0.47 | 0.54 | 0.46 | 0.56 | 0.69 | 0.59 |
| 1lqt | 19 | 0.44 | 0.5  | 0.42 | 0.44 | 0.5  | 0.42 |
| 1wvf | 19 | 0.41 | 0.47 | 0.38 | 0.44 | 0.47 | 0.4  |
| 1sez | 19 | 0.38 | 0.43 | 0.34 | 0.38 | 0.43 | 0.34 |
| 2jbn | 19 | 0.33 | 0.36 | 0.28 | 0.33 | 0.36 | 0.28 |
| 2nqm | 19 | 0.31 | 0.36 | 0.27 | 0.31 | 0.36 | 0.27 |
| 1d5t | 19 | 0.29 | 0.36 | 0.26 | 0.29 | 0.36 | 0.26 |
| 1uv4 | 20 | 0.76 | 0.87 | 0.8  | 0.82 | 0.93 | 0.87 |
| 1tl2 | 20 | 0.75 | 0.8  | 0.75 | 0.75 | 0.8  | 0.75 |
| 2hkl | 20 | 0.47 | 0.62 | 0.5  | 0.5  | 0.62 | 0.52 |
| 1xov | 20 | 0.41 | 0.5  | 0.41 | 0.41 | 0.5  | 0.41 |
| 2gso | 20 | 0.25 | 0.29 | 0.2  | 0.25 | 0.29 | 0.2  |
| 2i5v | 21 | 0.88 | 0.83 | 0.84 | 0.94 | 0.89 | 0.91 |
| 2hox | 21 | 0.56 | 0.64 | 0.57 | 0.62 | 0.71 | 0.64 |
| 2d5w | 21 | 0.56 | 0.67 | 0.58 | 0.56 | 0.67 | 0.58 |
| 1e9g | 21 | 0.56 | 0.67 | 0.58 | 0.59 | 0.67 | 0.6  |
| 1jov | 21 | 0.5  | 0.5  | 0.45 | 0.5  | 0.5  | 0.45 |
| 1yew | 21 | 0.42 | 0.5  | 0.41 | 0.42 | 0.5  | 0.41 |
| 2iho | 21 | 0.39 | 0.37 | 0.32 | 0.39 | 0.37 | 0.32 |
| 1wth | 21 | 0.39 | 0.37 | 0.32 | 0.39 | 0.37 | 0.32 |

|      |    |      |      |      |      |      |      |
|------|----|------|------|------|------|------|------|
| 1lpb | 21 | 0.39 | 0.39 | 0.33 | 0.5  | 0.5  | 0.45 |
| 1kjq | 21 | 0.33 | 0.38 | 0.3  | 0.33 | 0.38 | 0.3  |
| 1j5q | 22 | 0.26 | 0.31 | 0.23 | 0.26 | 0.31 | 0.23 |
| 2d5h | 22 | 0.24 | 0.22 | 0.17 | 0.35 | 0.33 | 0.29 |
| 2idb | 23 | 0.58 | 0.65 | 0.58 | 0.58 | 0.65 | 0.58 |
| 3dk9 | 23 | 0.5  | 0.59 | 0.51 | 0.5  | 0.59 | 0.51 |
| 3c9f | 23 | 0.35 | 0.41 | 0.33 | 0.42 | 0.47 | 0.4  |
| 1ulj | 23 | 0.35 | 0.37 | 0.31 | 0.4  | 0.42 | 0.36 |
| 2vrk | 24 | 0.62 | 0.65 | 0.61 | 0.62 | 0.65 | 0.61 |
| 1hx0 | 24 | 0.58 | 0.65 | 0.59 | 0.63 | 0.71 | 0.64 |
| 3dcd | 24 | 0.5  | 0.56 | 0.49 | 0.5  | 0.56 | 0.49 |
| 2d1s | 24 | 0.45 | 0.53 | 0.45 | 0.45 | 0.53 | 0.45 |
| 1gle | 24 | 0.43 | 0.53 | 0.44 | 0.43 | 0.53 | 0.44 |
| 2qjv | 24 | 0.3  | 0.33 | 0.27 | 0.35 | 0.39 | 0.32 |
| 1tfm | 25 | 0.62 | 0.76 | 0.67 | 0.62 | 0.76 | 0.67 |
| 1jlx | 25 | 0.6  | 0.63 | 0.59 | 0.6  | 0.63 | 0.59 |
| 2ex3 | 25 | 0.41 | 0.45 | 0.39 | 0.41 | 0.45 | 0.39 |
| 1ipk | 25 | 0.3  | 0.35 | 0.27 | 0.36 | 0.4  | 0.34 |
| 1z50 | 26 | 0.77 | 0.85 | 0.8  | 0.77 | 0.85 | 0.8  |
| 1hyo | 26 | 0.41 | 0.47 | 0.4  | 0.41 | 0.47 | 0.4  |
| 2e4t | 26 | 0.35 | 0.36 | 0.31 | 0.45 | 0.45 | 0.42 |
| 1xhb | 26 | 0.3  | 0.39 | 0.3  | 0.3  | 0.39 | 0.3  |
| 2qns | 27 | 0.82 | 0.9  | 0.85 | 0.82 | 0.9  | 0.85 |
| 2qe8 | 27 | 0.76 | 0.84 | 0.79 | 0.76 | 0.84 | 0.79 |
| 2hj0 | 27 | 0.55 | 0.57 | 0.53 | 0.55 | 0.57 | 0.53 |
| 1gk9 | 27 | 0.55 | 0.6  | 0.54 | 0.55 | 0.6  | 0.54 |



|      |    |      |      |      |      |      |      |
|------|----|------|------|------|------|------|------|
| 2pxz | 27 | 0.42 | 0.48 | 0.41 | 0.43 | 0.48 | 0.42 |
| 3eg9 | 27 | 0.33 | 0.38 | 0.31 | 0.33 | 0.38 | 0.31 |
| 2z2p | 28 | 0.83 | 0.9  | 0.86 | 0.83 | 0.9  | 0.86 |
| 1yfq | 28 | 0.78 | 0.86 | 0.81 | 0.78 | 0.86 | 0.81 |
| 1c9i | 28 | 0.7  | 0.76 | 0.71 | 0.74 | 0.81 | 0.76 |
| 2jf3 | 28 | 0.29 | 0.2  | 0.2  | 0.29 | 0.2  | 0.2  |
| 2ce9 | 30 | 0.75 | 0.78 | 0.75 | 0.75 | 0.78 | 0.75 |
| 2bhu | 30 | 0.43 | 0.52 | 0.44 | 0.44 | 0.52 | 0.45 |
| 2j3l | 31 | 0.46 | 0.54 | 0.47 | 0.5  | 0.58 | 0.51 |
| 1nex | 32 | 0.73 | 0.79 | 0.75 | 0.77 | 0.83 | 0.79 |
| 1hmw | 33 | 0.54 | 0.58 | 0.53 | 0.54 | 0.58 | 0.53 |
| 1w2z | 33 | 0.5  | 0.58 | 0.51 | 0.5  | 0.58 | 0.51 |
| 1qks | 35 | 0.82 | 0.88 | 0.85 | 0.82 | 0.88 | 0.85 |
| 2vpm | 35 | 0.5  | 0.64 | 0.54 | 0.5  | 0.64 | 0.54 |
| 2exj | 42 | 0.51 | 0.55 | 0.51 | 0.51 | 0.55 | 0.51 |
